# Supplementary material for: Defluorinative phosphorylation of perfluoroalkyl ketones: synthesis of fluoroalkylated and phosphorylated furan derivatives
Source: Royal Society of Chemistry journal article supplement (doi:10.1039/d0qo01631d), 2021-01-01

## Supporting Information

### **Defluorinative Phosphorylation of Perfluoroalkyl Ketones: Synthesis of Fluoroalkylated and Phosphorylated Furan Derivatives**

Qing-Dong Wang,\* Chen Zhang, Li-Wen Sun, Xin-Long Luo, Weidong Rao, Zhi-Liang Shen, and Xue-Qiang Chu\*

#### **Table of Contents**

|                                                                                                  |          |
|--------------------------------------------------------------------------------------------------|----------|
| 1. General information                                                                           | page S2  |
| 2. General procedures for the synthesis of tri(hetero)arylphosphine oxides                       | page S2  |
| 3. The synthesis of tri(hetero)arylphosphines <b>4</b>                                           | page S2  |
| 4. Scale-up synthesis of product <b>3aa</b>                                                      | page S3  |
| 5. Optimization of reaction conditions                                                           | page S4  |
| 6. Characterization data for products                                                            | page S7  |
| 7. References                                                                                    | page S23 |
| 8. The X-ray crystal structure of product <b>3aa</b>                                             | page S23 |
| 9. <sup>1</sup> H, <sup>19</sup> F, <sup>31</sup> P, and <sup>13</sup> C NMR spectra of products | page S24 |

## 1. General information

Unless otherwise stated, all reagents were purchased from commercial suppliers and used without further purification. All reactions were carried out under N<sub>2</sub> atmosphere using undistilled solvent. Melting points were recorded on an Electrothermal digital melting point apparatus. IR spectra were recorded on a FT-IR spectrophotometer using KBr optics. <sup>1</sup>H, <sup>19</sup>F, <sup>31</sup>P, and <sup>13</sup>C NMR spectra were recorded in CDCl<sub>3</sub> on Bruker Avance or Joel 400 MHz spectrometers. The chemical shifts ( $\delta$ ) are reported in ppm and coupling constants ( $J$ ) in Hz. High resolution mass spectra (HRMS) were obtained using a commercial apparatus (ESI or EI Source). Column chromatography was generally performed on silica gel (300-400 mesh) or alkali alumina (200-300 mesh) and reactions were monitored by thin layer chromatography (TLC) using UV light to visualize the course of the reactions.

## 2. General procedures for the synthesis of tri(hetero)arylphosphine oxides

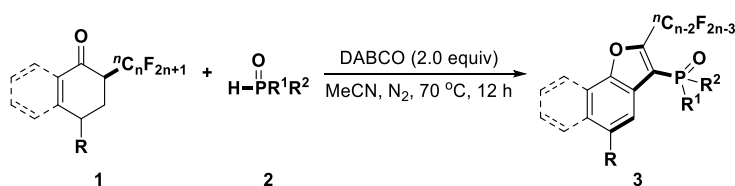

A solution of  $\alpha$ -perfluoroalkyl ketone **1**<sup>[1-2]</sup> (0.3 mmol), *P*-nucleophile **2** (0.36 mmol), and triethylenediamine (DABCO, 67 mg, 0.60 mmol) in MeCN (2.0 mL) was stirred under nitrogen atmosphere at 70 °C for 12 h. The reaction was then quenched by saturated NH<sub>4</sub>Cl solution (20 mL) and extracted with EtOAc (20 mL x 3). The organic layer was washed with saturated brine twice, dried over MgSO<sub>4</sub>, filtered, and concentrated under reduced pressure. The crude product was purified by flash column chromatography (300-400 mesh) using petroleum ether/ethyl acetate or dichloromethane/methanol as eluent to afford the pure products **3**.

## 3. The synthesis of tri(hetero)arylphosphines **4**<sup>[3]</sup>

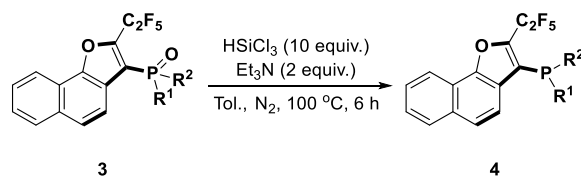

After removal of the solvent of above reaction mixture, the formed crude perfluoroalkylated naphtho[1,2-*b*]furan/benzofuran derivative **3** was directly used in the next step without further purification. Trichlorosilane (406 mg, 3 mmol), Et<sub>3</sub>N (71 mg, 0.6 mmol), and toluene (5 mL) was added to the above reaction mixture and stirred under nitrogen atmosphere at 100 °C for 6 h. Upon completion of the reaction (indicated by TLC), the reaction was then quenched by saturated NH<sub>4</sub>Cl solution (20 mL) and extracted with EtOAc (20 mL x 3). The organic layer was washed with saturated brine twice, dried over MgSO<sub>4</sub>, filtered, and concentrated under reduced pressure. The crude product was purified by flash column chromatography (300-400 mesh) using petroleum ether as eluent to afford the pure products **4**.

#### 4. Scale-up synthesis of product 3aa

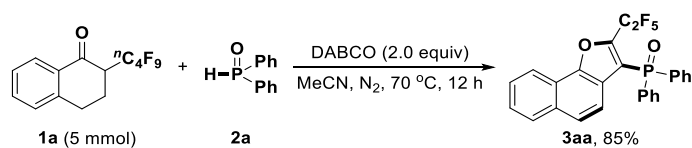

A solution of 2-(perfluorobutyl)-3,4-dihydronaphthalen-1(2*H*)-one (**1a**, 1.82 g, 5 mmol), diphenylphosphine oxide (**2a**, 1.21 g, 6 mmol), and triethylenediamine (DABCO, 1.12 g, 10 mmol) in MeCN (30.0 mL) was stirred under nitrogen atmosphere at 70 °C for 12 h. The reaction was then quenched by saturated NH<sub>4</sub>Cl solution (150 mL) and extracted with EtOAc (100 mL x 3). The organic layer was washed with saturated brine twice, dried over MgSO<sub>4</sub>, filtered, and concentrated under reduced pressure. The crude product was purified by flash column chromatography (300-400 mesh) using petroleum ether/ethyl acetate or dichloromethane/methanol as eluent to afford the pure products **3aa** (2.07 g, 85% yield).

## 5. Optimization of reaction conditions

### 1) Optimization of reaction conditions of 2-(perfluorobutyl)-3,4-dihydronaphthalen-1(2H)-one (**1a**) with diphenylphosphine oxide (**2a**)

**Table S1.** Initial attempts for the desired reaction<sup>[a]</sup>

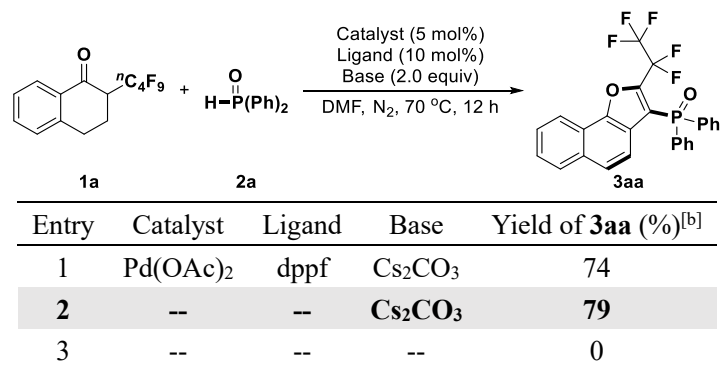

<sup>[a]</sup> Reaction conditions: 2-(perfluorobutyl)-3,4-dihydronaphthalen-1(2H)-one (**1a**, 0.3 mmol), diphenylphosphine oxide (**2a**, 0.36 mmol), catalyst (0.015 mmol), ligand (0.03 mmol), and base (0.6 mmol) in DMF (2.0 mL) at 70 °C under N<sub>2</sub> for 12 h. <sup>[b]</sup> Yields were determined by NMR analysis with 1,4-dimethoxybenzene as an internal standard.

**Table S2.** Optimization of the reaction solvent<sup>[a]</sup>

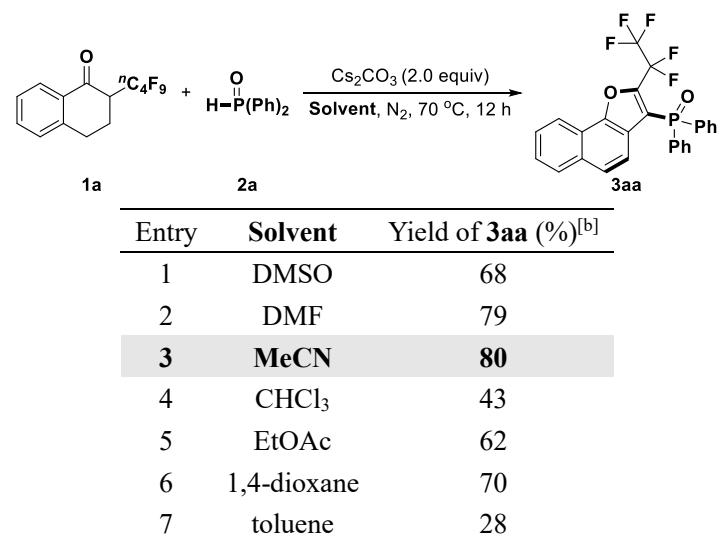

<sup>[a]</sup> Reaction conditions: 2-(perfluorobutyl)-3,4-dihydronaphthalen-1(2H)-one (**1a**, 0.3 mmol), diphenylphosphine oxide (**2a**, 0.36 mmol), and Cs<sub>2</sub>CO<sub>3</sub> (0.6 mmol) in solvent (2.0 mL) at 70 °C under N<sub>2</sub> for 12 h. <sup>[b]</sup> Yields were determined by NMR analysis with 1,4-dimethoxybenzene as an internal standard.



**Table S3.** Optimization of the reaction base<sup>[a]</sup>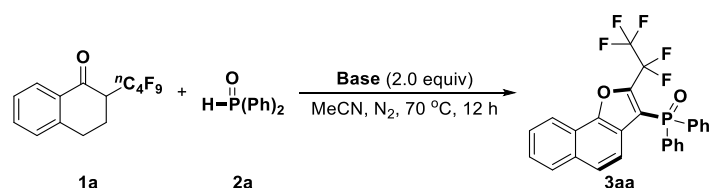

| Entry    | Base                            | Yield of <b>3aa</b> (%) <sup>[b]</sup> |
|----------|---------------------------------|----------------------------------------|
| 1        | CS <sub>2</sub> CO <sub>3</sub> | 80                                     |
| 2        | K <sub>2</sub> CO <sub>3</sub>  | 65                                     |
| 3        | NaOH                            | trace                                  |
| 4        | K <sub>3</sub> PO <sub>4</sub>  | 33                                     |
| <b>5</b> | <b>DABCO</b>                    | <b>87 (86)</b> <sup>[c]</sup>          |
| 6        | DBU                             | 38                                     |

<sup>[a]</sup> Reaction conditions: 2-(perfluorobutyl)-3,4-dihydronaphthalen-1(2*H*)-one (**1a**, 0.3 mmol), diphenylphosphine oxide (**2a**, 0.36 mmol), and base (0.6 mmol) in MeCN (2.0 mL) at 70 °C under N<sub>2</sub> for 12 h. <sup>[b]</sup> Yields were determined by NMR analysis with 1,4-dimethoxybenzene as an internal standard. <sup>[c]</sup> Isolated yield.

**Table S4.** Optimization of the reaction temperature<sup>[a]</sup>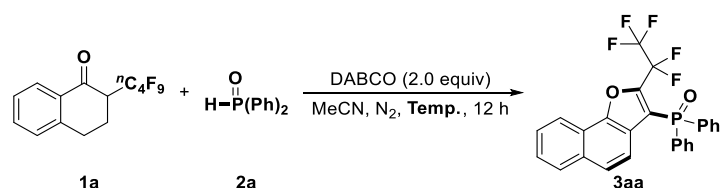

| Entry    | Temperature (°C) | Yield of <b>3aa</b> (%) <sup>[b]</sup> |
|----------|------------------|----------------------------------------|
| 1        | 25               | 68                                     |
| 2        | 50               | 83                                     |
| <b>3</b> | <b>70</b>        | <b>87 (86)</b> <sup>[c]</sup>          |

<sup>[a]</sup> Reaction conditions: 2-(perfluorobutyl)-3,4-dihydronaphthalen-1(2*H*)-one (**1a**, 0.3 mmol), diphenylphosphine oxide (**2a**, 0.36 mmol), and DABCO (0.6 mmol) in MeCN (2.0 mL) at 25-70 °C under N<sub>2</sub> for 12 h. <sup>[b]</sup> Yields were determined by NMR analysis with 1,4-dimethoxybenzene as an internal standard. <sup>[c]</sup> Isolated yield.

## 2) Optimization of reaction conditions for the synthesis of phosphines 4

**Table S5.** Initial attempts for the desired reaction<sup>[a]</sup>

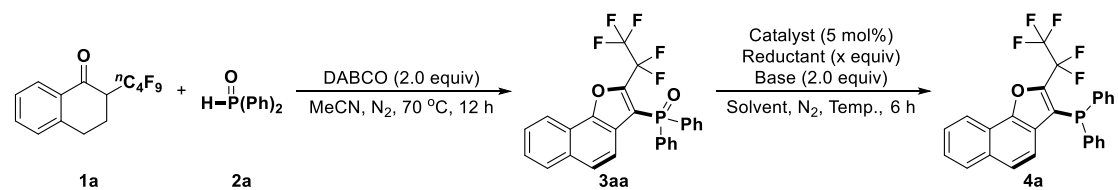

| Entry    | Catalyst             | Reductant (x equiv.)          | Base                   | Solvent        | Temp. (°C) | Yield of <b>4a</b> (%) <sup>[b]</sup> |
|----------|----------------------|-------------------------------|------------------------|----------------|------------|---------------------------------------|
| 1        | --                   | TMDS (5)                      | DABCO                  | MeCN           | 70         | trace                                 |
| 2        | Cu(OTf) <sub>2</sub> | TMDS (5)                      | DABCO                  | MeCN           | 70         | trace                                 |
| 3        | --                   | --                            | --                     | MeCN           | 70         | trace                                 |
| <b>4</b> | --                   | <b>HSiCl<sub>3</sub> (10)</b> | <b>Et<sub>3</sub>N</b> | <b>toluene</b> | <b>100</b> | <b>67</b>                             |
| 5        | --                   | HSiCl <sub>3</sub> (10)       | Et <sub>3</sub> N      | toluene        | 100        | 77 <sup>[c]</sup>                     |

<sup>[a]</sup> Reaction conditions: **step 1**: 2-(perfluorobutyl)-3,4-dihydronaphthalen-1(2H)-one (**1a**, 0.30 mmol), diphenylphosphine oxide (**2a**, 0.36 mmol), and DABCO (0.6 mmol) in MeCN (2.0 mL) at 70 °C under N<sub>2</sub> for 12 h; **step 2**: catalyst (0.015 mmol), reductant (1.5-3.0 mmol), and base (0.6 mmol) were added and stirred under N<sub>2</sub> at 70-100 °C in solvent (2.0 mL) for 6 h; TMDS = 1,1,3,3-tetramethyl disilazane. <sup>[b]</sup> Isolated Yield. <sup>[c]</sup> 0.3 mmol of **3aa** was directly used for reduction.

## 6. Characterization data for products

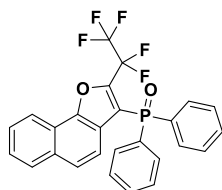

### (2-(Perfluoroethyl)naphtho[1,2-*b*]furan-3-yl)diphenylphosphine oxide (3aa):

Yield = 86% (125 mg). Yellow solid. M.p. 199.7–200.9 °C.

**IR** (KBr):  $\nu = 3056, 1546, 1438, 1333, 1203, 1146, 1124, 1036, 934, 754 \text{ cm}^{-1}$ .

**<sup>1</sup>H NMR** (400 MHz, CDCl<sub>3</sub>):  $\delta = 8.31$  (d,  $J = 8.1$  Hz, 1H),  $7.86$  (d,  $J = 8.0$  Hz, 1H),  $7.84 - 7.75$  (m, 4H),  $7.65 - 7.54$  (m, 5H),  $7.53 - 7.46$  (m, 4H),  $7.23$  (d,  $J = 8.9$  Hz, 1H) ppm.

**<sup>19</sup>F NMR** (376 MHz, CDCl<sub>3</sub>):  $\delta = -82.09 - -82.73$  (m, 3F),  $-107.67 - -108.41$  (m, 2F) ppm.

**<sup>31</sup>P NMR** (162 MHz, CDCl<sub>3</sub>):  $\delta = 20.2$  ppm.

**<sup>13</sup>C NMR** (100 MHz, CDCl<sub>3</sub>):  $\delta = 151.3$  (d,  $J = 11.1$  Hz),  $145.0$  (m),  $132.6, 132.5$  (d,  $J = 2.8$  Hz),  $132.3, 131.6, 131.5, 128.6$  (d,  $J = 12.9$  Hz),  $128.1, 127.2$  (d,  $J = 6.9$  Hz),  $125.5, 123.9$  (d,  $J = 7.8$  Hz),  $120.4, 120.3, 119.9, 118.1$  (m) ppm; carbons corresponding to the C<sub>2</sub>F<sub>5</sub> group cannot be identified due to C-F coupling.

**HRMS** (m/z): calcd for C<sub>26</sub>H<sub>17</sub>F<sub>5</sub>O<sub>2</sub>P [M+H]<sup>+</sup> 487.0881, found: 487.0889.

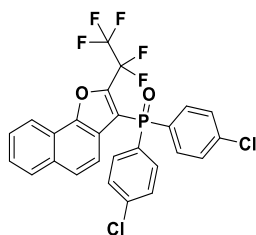

### Bis(4-chlorophenyl)(2-(perfluoroethyl)naphtho[1,2-*b*]furan-3-yl)phosphine oxide (3ab):

Yield = 99% (165 mg). Orange solid. M.p. 72.1–73.7 °C.

**IR** (KBr):  $\nu = 3060, 1583, 1553, 1483, 1389, 1330, 1210, 1087, 1014, 937, 761 \text{ cm}^{-1}$ .

**<sup>1</sup>H NMR** (400 MHz, CDCl<sub>3</sub>):  $\delta = 8.33$  (d,  $J = 8.1$  Hz, 1H),  $7.91$  (d,  $J = 7.9$  Hz, 1H),  $7.74 - 7.67$  (m, 4H),  $7.66 - 7.57$  (m, 3H),  $7.53 - 7.46$  (m, 4H),  $7.35$  (d,  $J = 8.9$  Hz, 1H) ppm.

**<sup>19</sup>F NMR** (376 MHz, CDCl<sub>3</sub>):  $\delta = -82.29$  (t,  $J = 3.4$  Hz, 3F),  $-107.47 - -107.83$  (m, 2F) ppm.

**<sup>31</sup>P NMR** (162 MHz, CDCl<sub>3</sub>):  $\delta = 19.6$  ppm.

**<sup>13</sup>C NMR** (100 MHz, CDCl<sub>3</sub>):  $\delta = 151.5$  (m),  $145.0$  (m),  $139.5$  (d,  $J = 3.6$  Hz),  $133.0$  (d,  $J = 11.6$  Hz),  $132.5, 130.3$  (m),  $129.2, 129.1, 128.2, 127.4$  (d,  $J = 9.2$  Hz),  $125.9, 123.7$  (m),  $120.4, 120.4, 119.7, 117.2$  (d,  $J = 107.2$  Hz) ppm; carbons corresponding to the C<sub>2</sub>F<sub>5</sub> group cannot be identified due to C-F coupling.

**HRMS** (m/z): calcd for C<sub>26</sub>H<sub>15</sub>Cl<sub>2</sub>F<sub>5</sub>O<sub>2</sub>P [M+H]<sup>+</sup> 555.0101, found: 555.0109.

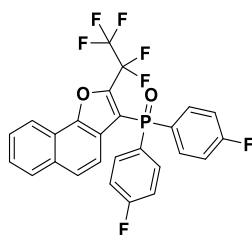

**Bis(4-fluorophenyl)(2-(perfluoroethyl)naphtho[1,2-b]furan-3-yl)phosphine oxide (3ac):**

Yield = 94% (147 mg). Yellow solid. M.p. 72.1–73.7 °C.

**IR** (KBr):  $\nu = 3066, 1592, 1500, 1333, 1240, 1204, 1123, 1067, 935, 803 \text{ cm}^{-1}$ .

**<sup>1</sup>H NMR** (400 MHz, CDCl<sub>3</sub>):  $\delta = 8.33 \text{ (d, } J = 8.0 \text{ Hz, 1H)}, 7.91 \text{ (d, } J = 8.0 \text{ Hz, 1H)}, 7.85 - 7.74 \text{ (m, 4H)}, 7.70 - 7.55 \text{ (m, 3H)}, 7.39 \text{ (d, } J = 8.9 \text{ Hz, 1H)}, 7.22 \text{ (t, } J = 7.9 \text{ Hz, 4H)}$  ppm.

**<sup>19</sup>F NMR** (376 MHz, CDCl<sub>3</sub>):  $\delta = -82.08 - -82.64 \text{ (m, 3F)}, -104.30 - -105.35 \text{ (m, 2F)}, -107.29 - -108.30 \text{ (m, 2F)}$  ppm.

**<sup>31</sup>P NMR** (162 MHz, CDCl<sub>3</sub>):  $\delta = 19.4$  ppm.

**<sup>13</sup>C NMR** (100 MHz, CDCl<sub>3</sub>):  $\delta = 165.4 \text{ (m)}, 151.5 \text{ (m)}, 144.8 \text{ (m)}, 134.2 \text{ (m)}, 132.5, 128.2, 128.1 \text{ (m)}, 127.4, 127.3, 125.8, 123.9 \text{ (d, } J = 7.7 \text{ Hz)}, 120.4, 120.4, 119.8, 117.7 \text{ (m)}, 116.2 \text{ (m)}$  ppm; carbons corresponding to the C<sub>2</sub>F<sub>5</sub> group cannot be identified due to C-F coupling.

**HRMS** (m/z): calcd for C<sub>26</sub>H<sub>15</sub>F<sub>7</sub>O<sub>2</sub>P [M+H]<sup>+</sup> 523.0692, found: 523.0701.

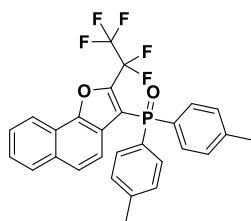

**(2-(Perfluoroethyl)naphtho[1,2-b]furan-3-yl)di-*p*-tolylphosphine oxide (3ad):**

Yield = 80% (123 mg). Yellow oil.

**IR** (KBr):  $\nu = 2923, 1602, 1553, 1513, 1329, 1220, 1118, 936, 808 \text{ cm}^{-1}$ .

**<sup>1</sup>H NMR** (400 MHz, CDCl<sub>3</sub>):  $\delta = 8.35 - 8.29 \text{ (m, 1H)}, 7.87 \text{ (d, } J = 8.0 \text{ Hz, 1H)}, 7.71 - 7.53 \text{ (m, 7H)}, 7.33 - 7.26 \text{ (m, 5H)}, 2.41 \text{ (s, 6H)}$  ppm.

**<sup>19</sup>F NMR** (376 MHz, CDCl<sub>3</sub>):  $\delta = -81.98 - -82.70 \text{ (m, 3F)}, -107.74 - -108.12 \text{ (m, 2F)}$  ppm.

**<sup>31</sup>P NMR** (162 MHz, CDCl<sub>3</sub>):  $\delta = 21.1$  ppm.

**<sup>13</sup>C NMR** (100 MHz, CDCl<sub>3</sub>):  $\delta = 151.2 \text{ (m)}, 144.9 \text{ (m)}, 143.0 \text{ (m)}, 132.4, 131.7, 131.6, 129.4, 129.3, 129.1 \text{ (m)}, 128.1 \text{ (m)}, 127.1 \text{ (m)}, 125.4 \text{ (m)}, 124.0 \text{ (m)}, 120.4, 120.2 \text{ (m)}, 118.6 \text{ (m)}, 21.5$  ppm; carbons corresponding to the C<sub>2</sub>F<sub>5</sub> group cannot be identified due to C-F coupling.

**HRMS** (m/z): calcd for C<sub>28</sub>H<sub>21</sub>F<sub>5</sub>O<sub>2</sub>P [M+H]<sup>+</sup> 515.1194, found: 515.1204.

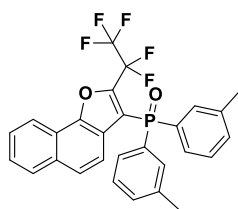

**(2-(Perfluoroethyl)naphtho[1,2-b]furan-3-yl)di-*m*-tolylphosphine oxide (3ae):**

Yield = 92% (142 mg). Yellow oil.

**IR** (KBr):  $\nu = 3088, 1735, 1552, 1513, 1329, 1208, 1116, 1034, 936, 811 \text{ cm}^{-1}$ .

**<sup>1</sup>H NMR** (400 MHz, CDCl<sub>3</sub>):  $\delta = 8.36 - 8.30 \text{ (m, 1H)}, 7.92 - 7.86 \text{ (m, 1H)}, 7.72 - 7.62 \text{ (m, 3H)}, 7.61 - 7.55 \text{ (m, 2H)}, 7.52 - 7.45 \text{ (m, 2H)}, 7.43 - 7.34 \text{ (m, 4H)}, 7.25 \text{ (d, } J = 9.0 \text{ Hz, 1H)}, 2.37 \text{ (s, 6H)}$  ppm.

**<sup>19</sup>F NMR** (376 MHz, CDCl<sub>3</sub>):  $\delta = -82.33 \text{ (t, } J = 4.0 \text{ Hz, 3F)}, -107.77 - -108.21 \text{ (m, 2F)}$  ppm.

**<sup>31</sup>P NMR** (162 MHz, CDCl<sub>3</sub>):  $\delta = 21.51$  ppm.

$^{13}\text{C}$  NMR (100 MHz,  $\text{CDCl}_3$ ):  $\delta$  = 151.3 (m), 145.0 (m), 138.7 (d,  $J$  = 12.6 Hz), 133.3 (d,  $J$  = 2.9 Hz), 132.7, 132.4, 132.1 (d,  $J$  = 10.2 Hz), 131.6 (m), 128.7 (d,  $J$  = 11.1 Hz), 128.4 (d,  $J$  = 13.8 Hz), 128.2, 127.2 (d,  $J$  = 7.5 Hz), 125.4, 124.1 (m), 120.5, 120.3 (d,  $J$  = 21.2 Hz), 118.4 (m), 117.9 (m), 21.3 ppm; carbons corresponding to the  $\text{C}_2\text{F}_5$  group cannot be identified due to C-F coupling.

HRMS (m/z): calcd for  $\text{C}_{28}\text{H}_{21}\text{F}_5\text{O}_2\text{P}$   $[\text{M}+\text{H}]^+$  515.1194, found: 515.1204.

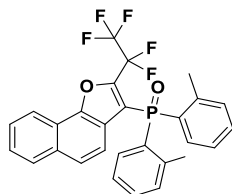

**(2-(Perfluoroethyl)naphtho[1,2-*b*]furan-3-yl)di-*o*-tolylphosphine oxide (3af):**

Yield = 68% (105 mg). Yellow oil.

IR (KBr):  $\nu$  = 3061, 2963, 2927, 2856, 1594, 1453, 1211, 1126, 1034, 936, 808  $\text{cm}^{-1}$ .

$^1\text{H}$  NMR (400 MHz,  $\text{CDCl}_3$ ):  $\delta$  = 8.38 (d,  $J$  = 8.1 Hz, 1H), 7.91 (d,  $J$  = 8.1 Hz, 1H), 7.68 (t,  $J$  = 7.4 Hz, 1H), 7.64 – 7.55 (m, 2H), 7.52 – 7.45 (m, 2H), 7.38 – 7.32 (m, 2H), 7.28 (d,  $J$  = 9.0 Hz, 1H), 7.22 – 7.15 (m, 4H), 2.61 (s, 6H) ppm.

$^{19}\text{F}$  NMR (376 MHz,  $\text{CDCl}_3$ ):  $\delta$  = -82.35 (t,  $J$  = 2.8 Hz, 3F), -107.92 – 107.84 (m, 2F) ppm.

$^{31}\text{P}$  NMR (162 MHz,  $\text{CDCl}_3$ ):  $\delta$  = 27.1 ppm.

$^{13}\text{C}$  NMR (100 MHz,  $\text{CDCl}_3$ ):  $\delta$  = 151.4 (m), 143.8 (d,  $J$  = 8.3 Hz), 132.5, 132.5, 132.3 (m), 132.2, 132.2, 132.1, 130.1 (d,  $J$  = 109.8 Hz), 128.2, 127.3 (d,  $J$  = 6.9 Hz), 125.6, 125.5, 124.3 (d,  $J$  = 7.5 Hz), 120.6, 120.5, 120.0, 118.3 (d,  $J$  = 102.0 Hz), 21.7 (d,  $J$  = 4.4 Hz) ppm; carbons corresponding to the  $\text{C}_2\text{F}_5$  group cannot be identified due to C-F coupling.

HRMS (m/z): calcd for  $\text{C}_{28}\text{H}_{21}\text{F}_5\text{O}_2\text{P}$   $[\text{M}+\text{H}]^+$  515.1194, found: 515.1204.

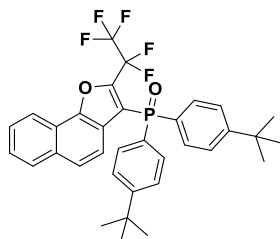

**Bis(4-(*tert*-butyl)phenyl)(2-(perfluoroethyl)naphtho[1,2-*b*]furan-3-yl)phosphine oxide (3ag):**

Yield = 93% (167 mg). Yellow oil.

IR (KBr):  $\nu$  = 2964, 2870, 1719, 1599, 1553, 1394, 1212, 1137, 1034, 937, 829  $\text{cm}^{-1}$ .

$^1\text{H}$  NMR (400 MHz,  $\text{CDCl}_3$ ):  $\delta$  = 8.32 (d,  $J$  = 8.0 Hz, 1H), 7.89 (d,  $J$  = 8.0 Hz, 1H), 7.75 – 7.67 (m, 4H), 7.63 (t,  $J$  = 7.4 Hz, 1H), 7.57 (t,  $J$  = 6.9 Hz, 2H), 7.54 – 7.47 (m, 4H), 7.35 (d,  $J$  = 8.9 Hz, 1H), 1.33 (s, 18H) ppm.

$^{19}\text{F}$  NMR (376 MHz,  $\text{CDCl}_3$ ):  $\delta$  = -81.69 – -82.94 (m, 3F), -107.12 – -108.59 (m, 2F) ppm.

$^{31}\text{P}$  NMR (162 MHz,  $\text{CDCl}_3$ ):  $\delta$  = 21.2 ppm.

$^{13}\text{C}$  NMR (100 MHz,  $\text{CDCl}_3$ ):  $\delta$  = 156.1 (d,  $J$  = 3.1 Hz), 151.3 (m), 132.4, 131.7, 131.5, 129.0 (m), 128.1, 127.1 (d,  $J$  = 7.8 Hz), 125.6, 125.5, 125.3, 124.3 (m), 120.5, 120.4, 120.4, 118.6 (m), 35.0 (d,  $J$  = 1.2 Hz), 31.0 ppm; carbons corresponding to the  $\text{C}_2\text{F}_5$  group cannot be identified due to C-F coupling.

HRMS (m/z): calcd for  $\text{C}_{34}\text{H}_{33}\text{F}_5\text{O}_2\text{P}$   $[\text{M}+\text{H}]^+$  599.2133, found: 599.2136.

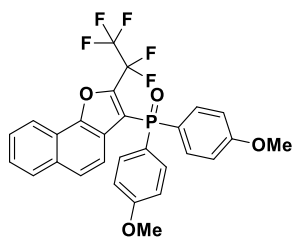

**Bis(4-methoxyphenyl)(2-(perfluoroethyl)naphtho[1,2-*b*]furan-3-yl)phosphine oxide (3ah):**

Yield = 79% (129 mg). Yellow oil.

**IR** (KBr):  $\nu = 3063, 2934, 2840, 1907, 1598, 1504, 1259, 1208, 1120, 1033, 935, 805 \text{ cm}^{-1}$ .

**<sup>1</sup>H NMR** (400 MHz, CDCl<sub>3</sub>):  $\delta = 8.36 - 8.29$  (m, 1H), 7.89 (d,  $J = 8.0$  Hz, 1H), 7.74 – 7.66 (m, 4H), 7.65 – 7.54 (m, 3H), 7.33 (d,  $J = 8.9$  Hz, 1H), 7.03 – 6.97 (m, 4H), 3.84 (s, 6H) ppm.

**<sup>19</sup>F NMR** (376 MHz, CDCl<sub>3</sub>):  $\delta = -82.25 - -82.37$  (m, 3F),  $-107.77 - -107.93$  (m, 2F) ppm.

**<sup>31</sup>P NMR** (162 MHz, CDCl<sub>3</sub>):  $\delta = 34.21$  ppm.

**<sup>13</sup>C NMR** (100 MHz, CDCl<sub>3</sub>):  $\delta = 162.8$  (d,  $J = 2.9$  Hz), 151.2 (m), 144.7 (m), 133.5 (d,  $J = 12.1$  Hz), 132.4, 128.1, 127.1 (d,  $J = 5.2$  Hz), 125.4, 124.1 (m), 123.7 (d,  $J = 118.0$  Hz), 120.4, 120.3, 120.2, 118.9 (m), 114.1 (d,  $J = 14.0$  Hz), 55.3 ppm; carbons corresponding to the C<sub>2</sub>F<sub>5</sub> group cannot be identified due to C-F coupling.

**HRMS** (m/z): calcd for C<sub>28</sub>H<sub>21</sub>F<sub>5</sub>O<sub>4</sub>P [M+H]<sup>+</sup> 547.1092, found: 547.1098.

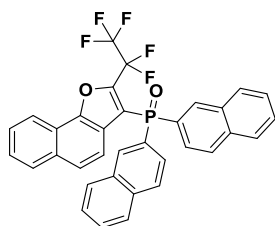

**Di(naphthalen-2-yl)(2-(perfluoroethyl)naphtho[1,2-*b*]furan-3-yl)phosphine oxide (3ai):**

Yield = 78% (137 mg). Pink solid. M.p. 259.1–260.8 °C.

**IR** (KBr):  $\nu = 3744, 3057, 1591, 1551, 1380, 1330, 1216, 1165, 1034, 935, 774 \text{ cm}^{-1}$ .

**<sup>1</sup>H NMR** (400 MHz, CDCl<sub>3</sub>):  $\delta = 8.91$  (d,  $J = 8.2$  Hz, 2H), 8.33 (d,  $J = 8.1$  Hz, 1H), 8.05 (d,  $J = 8.0$  Hz, 2H), 7.91 (d,  $J = 7.9$  Hz, 2H), 7.84 (d,  $J = 8.1$  Hz, 1H), 7.61 (t,  $J = 7.5$  Hz, 1H), 7.57 – 7.29 (m, 11H) ppm.

**<sup>19</sup>F NMR** (376 MHz, CDCl<sub>3</sub>):  $\delta = -82.35$  (t,  $J = 3.0$  Hz, 3F),  $-107.00 - -110.20$  (m, 2F) ppm.

**<sup>31</sup>P NMR** (162 MHz, CDCl<sub>3</sub>):  $\delta = 28.4$  ppm.

**<sup>13</sup>C NMR** (100 MHz, CDCl<sub>3</sub>):  $\delta = 151.4$  (d,  $J = 11.1$  Hz), 145.3 (m), 134.0 (d,  $J = 8.7$  Hz), 133.9 (d,  $J = 1.9$  Hz), 133.8 (d,  $J = 4.6$  Hz), 133.0 (d,  $J = 12.9$  Hz), 132.5, 128.9 (d,  $J = 1.3$  Hz), 128.2, 128.1 (d,  $J = 109.6$  Hz), 127.4, 127.3 (d,  $J = 5.7$  Hz), 127.2 (d,  $J = 9.1$  Hz), 126.7, 125.6, 124.3, 124.2, 124.2, 125.0, 120.4, 120.1, 118.4 (d,  $J = 104.6$  Hz) ppm; carbons corresponding to the C<sub>2</sub>F<sub>5</sub> group cannot be identified due to C-F coupling.

**HRMS** (m/z): calcd for C<sub>34</sub>H<sub>21</sub>F<sub>5</sub>O<sub>2</sub>P [M+H]<sup>+</sup> 587.1194, found: 587.1188.

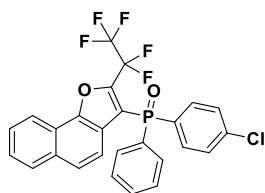

**(4-Chlorophenyl)(2-(perfluoroethyl)naphtho[1,2-*b*]furan-3-yl)(phenyl)phosphine oxide (3aj):**

Yield = 82% (128 mg). Yellow solid. M.p. 146.4–147.4 °C.

**IR** (KBr):  $\nu = 3027, 1578, 1513, 1383, 1328, 1206, 1167, 1086, 1034, 802, 778 \text{ cm}^{-1}$ .

**<sup>1</sup>H NMR** (400 MHz, CDCl<sub>3</sub>):  $\delta = 8.33$  (d,  $J = 8.1$  Hz, 1H), 7.90 (d,  $J = 8.0$  Hz, 1H), 7.82 – 7.69 (m, 4H), 7.68 – 7.57 (m, 4H), 7.56 – 7.45 (m, 4H), 7.30 (d,  $J = 8.9$  Hz, 1H) ppm.

**<sup>19</sup>F NMR** (376 MHz, CDCl<sub>3</sub>):  $\delta = -82.55$  –  $-82.40$  (m, 3F),  $-107.72$  –  $-107.84$  (m, 2F) ppm.

**<sup>31</sup>P NMR** (162 MHz, CDCl<sub>3</sub>):  $\delta = 20.2$  ppm.

**<sup>13</sup>C NMR** (100 MHz, CDCl<sub>3</sub>):  $\delta = 151.4$  (m), 145.0 (m), 139.2 (d,  $J = 3.4$  Hz), 133.1 (d,  $J = 11.5$  Hz), 132.8 (d,  $J = 3.0$  Hz), 132.5, 132.3, 131.6 (d,  $J = 10.7$  Hz), 131.3 (d,  $J = 16.3$  Hz), 130.3, 129.0 (d,  $J = 13.5$  Hz), 128.8 (d,  $J = 13.0$  Hz), 128.2, 127.4 (d,  $J = 8.2$  Hz), 125.7, 123.9 (d,  $J = 7.6$  Hz), 120.5, 120.4, 119.8, 117.7 (m) ppm; carbons corresponding to the C<sub>2</sub>F<sub>5</sub> group cannot be identified due to C-F coupling.

**HRMS** (m/z): calcd for C<sub>26</sub>H<sub>16</sub>ClF<sub>5</sub>O<sub>2</sub>P [M+H]<sup>+</sup> 521.0491, found: 521.0493.

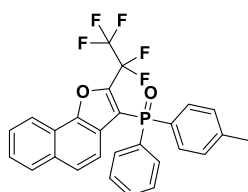

**(2-(Perfluoroethyl)naphtho[1,2-*b*]furan-3-yl)(phenyl)(*p*-tolyl)phosphine oxide (3ak):**

Yield = 73% (110 mg). Light-pink solid. M.p. 148.0–149.0 °C.

**IR** (KBr):  $\nu = 3059, 2924, 1549, 1438, 1328, 1225, 1202, 1119, 1057, 936, 808 \text{ cm}^{-1}$ .

**<sup>1</sup>H NMR** (400 MHz, CDCl<sub>3</sub>):  $\delta = 8.33$  (d,  $J = 8.1$  Hz, 1H), 7.89 (d,  $J = 8.1$  Hz, 1H), 7.82 – 7.74 (m, 2H), 7.71 – 7.55 (m, 6H), 7.53 – 7.45 (m, 2H), 7.31 (dd,  $J = 8.0, 2.9$  Hz, 2H), 7.27 – 7.24 (m, 1H), 2.42 (s, 3H) ppm.

**<sup>19</sup>F NMR** (376 MHz, CDCl<sub>3</sub>):  $\delta = -82.32$  (t,  $J = 2.8$  Hz, 3F),  $-107.87$  –  $-107.96$  (m, 2F) ppm.

**<sup>31</sup>P NMR** (162 MHz, CDCl<sub>3</sub>):  $\delta = 21.09$  ppm.

**<sup>13</sup>C NMR** (100 MHz, CDCl<sub>3</sub>):  $\delta = 151.3$  (m), 145.0 (m), 143.2 (d,  $J = 3.0$  Hz), 132.5 (m), 132.5, 132.4, 131.7 (d,  $J = 4.9$  Hz), 131.6 (d,  $J = 4.5$  Hz), 129.4 (d,  $J = 13.4$  Hz), 128.8 (m), 128.6 (d,  $J = 12.8$  Hz), 128.2, 127.3, 127.2, 124.1 (m), 120.5, 120.4, 120.1, 118.4 (m), 21.6 (d,  $J = 1.4$  Hz) ppm; carbons corresponding to the C<sub>2</sub>F<sub>5</sub> group cannot be identified due to C-F coupling.

**HRMS** (m/z): calcd for C<sub>27</sub>H<sub>19</sub>F<sub>5</sub>O<sub>2</sub>P [M+H]<sup>+</sup> 501.1037, found: 501.1042.

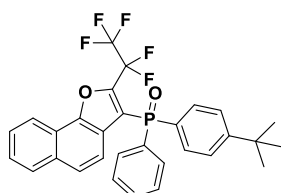

**(4-(*tert*-Butyl)phenyl)(2-(perfluoroethyl)naphtho[1,2-*b*]furan-3-yl)(phenyl)phosphine oxide**

**(3al):**

Yield = 83% (135 mg). Yellow oil.

**IR** (KBr):  $\nu = 2964, 1763, 1552, 1438, 1213, 1133, 1035, 936, 811 \text{ cm}^{-1}$ .

**<sup>1</sup>H NMR** (400 MHz, CDCl<sub>3</sub>):  $\delta = 8.32 \text{ (d, } J = 8.2 \text{ Hz, 1H)}, 7.89 \text{ (d, } J = 8.0 \text{ Hz, 1H)}, 7.82 - 7.69 \text{ (m, 4H)}, 7.66 - 7.62 \text{ (m, 1H)}, 7.61 - 7.55 \text{ (m, 3H)}, 7.54 - 7.46 \text{ (m, 4H)}, 7.29 \text{ (d, } J = 8.9 \text{ Hz, 1H)}, 1.34 \text{ (s, 9H)}$  ppm.

**<sup>19</sup>F NMR** (376 MHz, CDCl<sub>3</sub>):  $\delta = -82.36 \text{ (t, } J = 3.8 \text{ Hz, 3F)}, -107.32 - -108.48 \text{ (m, 2F)}$  ppm.

**<sup>31</sup>P NMR** (162 MHz, CDCl<sub>3</sub>):  $\delta = 21.25$  ppm.

**<sup>13</sup>C NMR** (100 MHz, CDCl<sub>3</sub>):  $\delta = 156.2 \text{ (d, } J = 2.9 \text{ Hz)}, 151.3 \text{ (m)}, 144.9 \text{ (m)}, 131.6 \text{ (m)}, 132.4 \text{ (m)}, 132.4, 131.6 \text{ (m)}, 128.6 \text{ (m)}, 128.5, 128.1, 128.0, 127.2 \text{ (d, } J = 7.5 \text{ Hz)}, 125.8, 125.6, 125.4, 124.1 \text{ (m)}, 120.5, 120.4, 120.2, 118.4 \text{ (m)}, 35.0 \text{ (d, } J = 1.0 \text{ Hz)}, 31.0$  ppm; carbons corresponding to the C<sub>2</sub>F<sub>5</sub> group cannot be identified due to C-F coupling.

**HRMS** (m/z): calcd for C<sub>30</sub>H<sub>25</sub>F<sub>5</sub>O<sub>2</sub>P [M+H]<sup>+</sup> 543.1507, found: 543.1501.

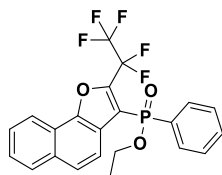**Ethyl (2-(perfluoroethyl)naphtho[1,2-*b*]furan-3-yl)(phenyl)phosphinate (3am):**

Yield = 58% (264 mg, 1 mmol scale). Yellow oil.

**IR** (KBr):  $\nu = 3062, 2985, 1594, 1559, 1439, 1222, 1125, 1035, 936, 814 \text{ cm}^{-1}$ .

**<sup>1</sup>H NMR** (400 MHz, CDCl<sub>3</sub>):  $\delta = 8.32 \text{ (d, } J = 8.0 \text{ Hz, 1H)}, 8.19 \text{ (d, } J = 8.8 \text{ Hz, 1H)}, 7.97 \text{ (d, } J = 7.8 \text{ Hz, 1H)}, 7.92 - 7.84 \text{ (m, 2H)}, 7.80 \text{ (d, } J = 8.9 \text{ Hz, 1H)}, 7.70 - 7.60 \text{ (m, 2H)}, 7.58 - 7.52 \text{ (m, 1H)}, 7.50 - 7.43 \text{ (m, 2H)}, 4.26 \text{ (q, } J = 6.7 \text{ Hz, 2H)}, 1.46 \text{ (t, } J = 7.0 \text{ Hz, 3H)}$  ppm.

**<sup>19</sup>F NMR** (376 MHz, CDCl<sub>3</sub>):  $\delta = -82.66 \text{ (t, } J = 3.5 \text{ Hz, 3F)}, -108.80 - -110.42 \text{ (m, 2F)}$  ppm.

**<sup>31</sup>P NMR** (162 MHz, CDCl<sub>3</sub>):  $\delta = 23.47$  ppm.

**<sup>13</sup>C NMR** (100 MHz, CDCl<sub>3</sub>):  $\delta = 151.3 \text{ (m)}, 144.6 \text{ (m)}, 132.7 \text{ (m)}, 131.5 \text{ (m)}, 131.2 \text{ (d, } J = 10.9 \text{ Hz)}, 128.8 \text{ (m)}, 128.7, 128.5, 128.3, 127.2, 125.8, 123.7 \text{ (m)}, 120.6, 120.4, 120.4, 117.0 \text{ (m)}, 61.8 \text{ (d, } J = 5.8 \text{ Hz)}, 16.3 \text{ (d, } J = 6.9 \text{ Hz)}$  ppm; carbons corresponding to the C<sub>2</sub>F<sub>5</sub> group cannot be identified due to C-F coupling.

**HRMS** (m/z): calcd for C<sub>22</sub>H<sub>17</sub>F<sub>5</sub>O<sub>3</sub>P [M+H]<sup>+</sup> 455.0830, found: 455.0834.

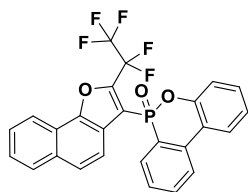**6-(2-(Perfluoroethyl)naphtho[1,2-*b*]furan-3-yl)dibenzo[*c,e*][1,2]oxaphosphinine 6-oxide (3an):**

Yield = 19% (95 mg, 1 mmol scale). Brown solid. M.p. 85.0–86.0 °C.

**IR** (KBr):  $\nu = 3630, 1560, 1478, 1331, 1209, 1120, 1036, 945, 752 \text{ cm}^{-1}$ .

**<sup>1</sup>H NMR** (400 MHz, CDCl<sub>3</sub>):  $\delta = 8.35 \text{ (d, } J = 8.0 \text{ Hz, 1H)}, 8.29 \text{ (d, } J = 8.8 \text{ Hz, 1H)}, 8.13 - 8.08 \text{ (m, 1H)}, 8.06 \text{ (dd, } J = 8.0, 1.4 \text{ Hz, 1H)}, 8.00 \text{ (d, } J = 7.6 \text{ Hz, 1H)}, 7.84 \text{ (d, } J = 8.8 \text{ Hz, 1H)}, 7.75 - 7.63 \text{ (m, 4H)}, 7.46 - 7.39 \text{ (m, 2H)}, 7.36 - 7.28 \text{ (m, 2H)}$  ppm.



$^{19}\text{F}$  NMR (376 MHz,  $\text{CDCl}_3$ ):  $\delta = -82.13 - -83.28$  (m, 3F),  $-110.35 - -111.90$  (m, 2F) ppm.

$^{31}\text{P}$  NMR (162 MHz,  $\text{CDCl}_3$ ):  $\delta = 14.15$  (d,  $J = 14.8$  Hz) ppm.

$^{13}\text{C}$  NMR (100 MHz,  $\text{CDCl}_3$ ):  $\delta = 151.4$  (m),  $148.8$  (d,  $J = 8.2$  Hz),  $134.9$  (d,  $J = 6.1$  Hz),  $133.5$ ,  $133.5$ ,  $132.8$ ,  $130.7$ ,  $130.6$  (d,  $J = 12.4$  Hz),  $128.4$ ,  $128.4$ ,  $128.3$ ,  $127.4$  (d,  $J = 7.4$  Hz),  $126.2$ ,  $125.8$  (t,  $J = 1.1$  Hz),  $125.0$  (d,  $J = 0.9$  Hz),  $124.8$ ,  $124.4$ ,  $124.3$  (d,  $J = 9.9$  Hz),  $123.5$  (d,  $J = 10.6$  Hz),  $121.2$  (d,  $J = 12.0$  Hz),  $120.5$ ,  $120.5$ ,  $120.5$ ,  $120.4$  ppm; carbons corresponding to the  $\text{C}_2\text{F}_5$  group cannot be identified due to C-F coupling.

HRMS (m/z): calcd for  $\text{C}_{26}\text{H}_{15}\text{F}_5\text{O}_3\text{P}$   $[\text{M}+\text{H}]^+$  501.0673, found: 501.0685.

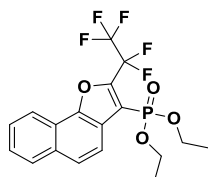

### Diethyl (2-(perfluoroethyl)naphtho[1,2-b]furan-3-yl)phosphonate (3ao):

Yield = 25% (32 mg). Yellow oil.

IR (KBr):  $\nu = 3065, 2985, 2931, 2857, 1729, 1566, 1332, 1261, 1220, 1137, 1036, 976, 817$   $\text{cm}^{-1}$ .

$^1\text{H}$  NMR (400 MHz,  $\text{CDCl}_3$ ):  $\delta = 8.38 - 8.31$  (m, 1H),  $8.22$  (d,  $J = 8.8$  Hz, 1H),  $7.98$  (d,  $J = 7.7$  Hz, 1H),  $7.82$  (d,  $J = 8.9$  Hz, 1H),  $7.70 - 7.60$  (m, 2H),  $4.35 - 4.14$  (m, 4H),  $1.37$  (t,  $J = 7.1$  Hz, 6H) ppm.

$^{19}\text{F}$  NMR (376 MHz,  $\text{CDCl}_3$ ):  $\delta = -82.84$  (t,  $J = 3.4$  Hz, 3F),  $-111.07$  (p,  $J = 3.4$  Hz, 2F) ppm.

$^{31}\text{P}$  NMR (162 MHz,  $\text{CDCl}_3$ ):  $\delta = 8.57$  ppm.

$^{13}\text{C}$  NMR (100 MHz,  $\text{CDCl}_3$ ):  $\delta = 151.2$  (m),  $144.6$  (t,  $J = 20.7$  Hz),  $132.7$ ,  $128.4$ ,  $127.2$ ,  $125.8$ ,  $123.8$  (m),  $120.5$ ,  $120.4$ ,  $120.4$ ,  $113.9$  (m),  $109.2$  (d,  $J = 40.8$  Hz),  $62.8$  (d,  $J = 5.6$  Hz),  $16.2$  (d,  $J = 6.9$  Hz) ppm; carbons corresponding to the  $\text{C}_2\text{F}_5$  group cannot be identified due to C-F coupling.

HRMS (m/z): calcd for  $\text{C}_{18}\text{H}_{17}\text{F}_5\text{O}_4\text{P}$   $[\text{M}+\text{H}]^+$  423.0779, found: 423.0789.

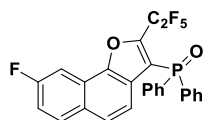

### (8-Fluoro-2-(perfluoroethyl)naphtho[1,2-b]furan-3-yl)diphenylphosphine oxide (3ba):

Yield = 88% (280 mg, 0.63 mmol scale). Light-yellow solid. M. p.  $169.8-170.4$   $^\circ\text{C}$ .

IR (KBr):  $\nu = 3063, 1547, 1518, 1437, 1347, 1207, 1168, 1123, 1029, 956, 835, 727, 701$   $\text{cm}^{-1}$ .

$^1\text{H}$  NMR (400 MHz,  $\text{CDCl}_3$ ):  $\delta = 7.94-7.86$  (m, 2H),  $7.83-7.75$  (m, 4H),  $7.65-7.56$  (m, 3H),  $7.51$  (td,  $J = 7.5, 3.2$  Hz, 4H),  $7.36-7.31$  (m, 1H),  $7.28-7.25$  (m, 1H) ppm.

$^{19}\text{F}$  NMR (376 MHz,  $\text{CDCl}_3$ ):  $\delta = -82.36$  (s, 3F),  $-108.04$  (s, 2F),  $-110.82$  (s, 1F) ppm.

$^{31}\text{P}$  NMR (162 MHz,  $\text{CDCl}_3$ ):  $\delta = 21.07$  ppm.

$^{13}\text{C}$  NMR (100 MHz,  $\text{CDCl}_3$ ):  $\delta = 161.3$  (d,  $J = 247.2$  Hz),  $150.8$  (m),  $145.4$  (m),  $132.6$  (d,  $J = 2.8$  Hz),  $132.0$  (d,  $J = 110.8$  Hz),  $131.6$  (d,  $J = 10.6$  Hz),  $130.8$  (d,  $J = 9.1$  Hz),  $129.3$ ,  $128.6$  (d,  $J = 12.8$  Hz),  $125.2$ ,  $124.8$  (d,  $J = 7.4$  Hz),  $121.2$  (d,  $J = 10.0$  Hz),  $119.3$ ,  $118.3$  (s),  $117.2$  (d,  $J = 24.5$  Hz),  $104.7$  (d,  $J = 23.5$  Hz) ppm; carbons corresponding to the  $\text{C}_2\text{F}_5$  group cannot be identified due to C-F coupling.

HRMS (m/z): calcd for  $\text{C}_{26}\text{H}_{16}\text{F}_6\text{O}_2\text{P}$   $[\text{M}+\text{H}]^+$  505.0787, found: 505.0787.

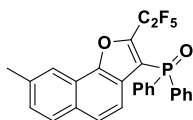

**(8-Methyl-2-(perfluoroethyl)naphtho[1,2-*b*]furan-3-yl)diphenylphosphine oxide (3ca):**

Yield = 88% (176 mg, 0.4 mmol scale). Brown solid. M. p. 152.2-153.4 °C.

**IR** (KBr):  $\nu = 3059, 2923, 2853, 1546, 1436, 1333, 1205, 1122, 1041, 946, 834, 753, 726 \text{ cm}^{-1}$ .

**<sup>1</sup>H NMR** (400 MHz, CDCl<sub>3</sub>):  $\delta = 8.09$  (dd,  $J = 1.9, 1.0 \text{ Hz}$ , 1H), 7.83–7.75 (m, 5H), 7.63–7.57 (m, 2H), 7.54–7.47 (m, 5H), 7.41 (dd,  $J = 8.4, 1.7 \text{ Hz}$ , 1H), 7.11 (d,  $J = 8.9 \text{ Hz}$ , 1H), 2.57 (s, 3H) ppm.

**<sup>19</sup>F NMR** (376 MHz, CDCl<sub>3</sub>):  $\delta = -82.32$  (s, 3F),  $-107.97$  (s, 2F) ppm.

**<sup>31</sup>P NMR** (162 MHz, CDCl<sub>3</sub>):  $\delta = 20.99$  ppm.

**<sup>13</sup>C NMR** (100 MHz, CDCl<sub>3</sub>):  $\delta = 151.1$  (d,  $J = 11.0 \text{ Hz}$ ), 145.0 (m), 137.4, 132.7, 132.5 (d,  $J = 2.9 \text{ Hz}$ ), 131.6 (d,  $J = 10.6 \text{ Hz}$ ), 131.6, 130.6, 129.4, 128.6 (d,  $J = 12.6 \text{ Hz}$ ), 128.0, 125.3, 124.0 (d,  $J = 7.5 \text{ Hz}$ ), 120.6, 119.1 (d,  $J = 55.0 \text{ Hz}$ ), 118.0 (m), 21.8 ppm; carbons corresponding to the C<sub>2</sub>F<sub>5</sub> group cannot be identified due to C-F coupling.

**HRMS** (m/z): calcd for C<sub>27</sub>H<sub>19</sub>F<sub>5</sub>O<sub>2</sub>P [M+H]<sup>+</sup> 501.1037, found: 501.1041.

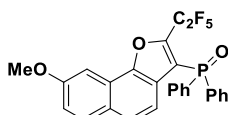

**(8-Methoxy-2-(perfluoroethyl)naphtho[1,2-*b*]furan-3-yl)diphenylphosphine oxide (3da):**

Yield = 84% (65 mg, 0.15 mmol scale). Brown solid. M. p. 153.8-154.6 °C.

**IR** (KBr):  $\nu = 3058, 2962, 1559, 1516, 1439, 1331, 1224, 1209, 1198, 1177, 955, 832, 728 \text{ cm}^{-1}$ .

**<sup>1</sup>H NMR** (400 MHz, CDCl<sub>3</sub>):  $\delta = 7.82$ –7.74 (m, 5H), 7.64–7.56 (m, 3H), 7.54–7.47 (m, 5H), 7.23 (dd,  $J = 8.9, 2.6 \text{ Hz}$ , 1H), 7.01 (d,  $J = 8.8 \text{ Hz}$ , 1H), 3.99 (s, 3H) ppm.

**<sup>19</sup>F NMR** (376 MHz, CDCl<sub>3</sub>):  $\delta = -82.32$  (s, 3F),  $-108.15$  (s, 2F) ppm.

**<sup>31</sup>P NMR** (162 MHz, CDCl<sub>3</sub>):  $\delta = 20.87$  ppm.

**<sup>13</sup>C NMR** (100 MHz, CDCl<sub>3</sub>):  $\delta = 158.8, 150.9$  (d,  $J = 11.2 \text{ Hz}$ ), 145.1 (m), 132.8, 132.5 (d,  $J = 3.0 \text{ Hz}$ ), 131.7 (d,  $J = 10.2 \text{ Hz}$ ), 129.9, 128.7, 128.6, 127.6, 125.2, 124.5 (d,  $J = 7.6 \text{ Hz}$ ), 121.5, 119.5, 117.4, 99.2, 55.5 ppm; carbons corresponding to the C<sub>2</sub>F<sub>5</sub> group cannot be identified due to C-F coupling.

**HRMS** (m/z): calcd for C<sub>27</sub>H<sub>19</sub>F<sub>5</sub>O<sub>3</sub>P [M+H]<sup>+</sup> 517.0986, found: 517.0985.

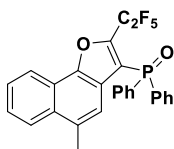

**(5-Methyl-2-(perfluoroethyl)naphtho[1,2-*b*]furan-3-yl)diphenylphosphine oxide (3ea):**

Yield = 56% (42 mg, 0.15 mmol scale). Light-yellow solid. M. p. 238.8-239.1 °C.

**IR** (KBr):  $\nu = 3060, 2943, 1547, 1441, 1332, 1224, 1202, 1124, 1038, 934, 754, 701, 567 \text{ cm}^{-1}$ .

**<sup>1</sup>H NMR** (400 MHz, CDCl<sub>3</sub>):  $\delta = 8.38$ –8.32 (m, 1H), 8.05–8.00 (m, 1H), 7.78 (dd,  $J = 12.8, 7.5 \text{ Hz}$ , 4H), 7.70–7.59 (m, 4H), 7.55–7.48 (m, 4H), 7.10 (s, 1H), 2.54 (s, 3H) ppm.

**<sup>19</sup>F NMR** (376 MHz, CDCl<sub>3</sub>):  $\delta = -82.40$  (s, 3F),  $-107.84$  (s, 2F) ppm.

**<sup>31</sup>P NMR** (162 MHz, CDCl<sub>3</sub>):  $\delta = 21.66$  ppm.

**<sup>13</sup>C NMR** (100 MHz, CDCl<sub>3</sub>):  $\delta = 150.6$  (d,  $J = 10.6 \text{ Hz}$ ), 144.4, 132.8, 132.5 (d,  $J = 2.7 \text{ Hz}$ ), 131.9,

131.8, 131.7, 131.7, 128.6 (d,  $J = 12.6$  Hz), 127.0 (d,  $J = 33.3$  Hz), 124.9, 123.7 (d,  $J = 7.3$  Hz), 120.9, 120.5, 119.8, 117.7 (m), 19.9 ppm; carbons corresponding to the  $C_2F_5$  group cannot be identified due to C-F coupling.

**HRMS** ( $m/z$ ): calcd for  $C_{27}H_{19}F_5O_2P$   $[M+H]^+$  501.1037, found: 501.1036.

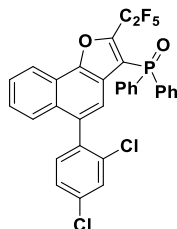

**(5-(2,4-Dichlorophenyl)-2-(perfluoroethyl)naphtho[1,2-*b*]furan-3-yl)diphenylphosphine oxide (3fa):**

Yield = 63% (60 mg, 0.15 mmol scale). Light-yellow solid. M. p. 213.9-214.7 °C.

**IR** (KBr):  $\nu = 2989, 1551, 1437, 1329, 1210, 1121, 1042, 931, 773, 728, 694, 565, 540$   $cm^{-1}$ .

**$^1H$  NMR** (400 MHz,  $CDCl_3$ ):  $\delta = 8.43$  (d,  $J = 8.1$  Hz, 1H), 7.86 (d,  $J = 8.4$  Hz, 1H), 7.79 (dd,  $J = 12.7, 7.2$  Hz, 4H), 7.70 (t,  $J = 7.5$  Hz, 1H), 7.65–7.57 (m, 3H), 7.56–7.47 (m, 5H), 7.33 (d,  $J = 1.6$  Hz, 1H), 7.16 (dd,  $J = 8.1, 1.9$  Hz, 1H), 7.09 (s, 1H) ppm.

**$^{19}F$  NMR** (376 MHz,  $CDCl_3$ ):  $\delta = -82.37$  (s, 3F),  $-108.27$  (s, 2F) ppm.

**$^{31}P$  NMR** (162 MHz,  $CDCl_3$ ):  $\delta = 21.16$  ppm.

**$^{13}C$  NMR** (100 MHz,  $CDCl_3$ ):  $\delta = 151.3$  (d,  $J = 10.1$  Hz), 145.4 (m), 139.8, 135.4, 132.7, 132.4, 131.8, 131.7, 131.7, 131.5, 130.5, 130.1, 129.4, 128.8 (d,  $J = 12.2$  Hz), 127.7, 127.4, 126.3, 123.5 (d,  $J = 6.2$  Hz), 121.1, 120.9, 120.7, 118.4 (m) ppm; carbons corresponding to the  $C_2F_5$  group cannot be identified due to C-F coupling.

**HRMS** ( $m/z$ ): calcd for  $C_{32}H_{19}Cl_2F_5O_2P$   $[M+H]^+$  631.0414, found: 631.0418.

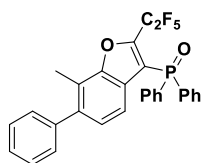

**(7-Methyl-2-(perfluoroethyl)-6-phenylbenzofuran-3-yl)diphenylphosphine oxide (3ga):**

Yield = 60% (32 mg, 0.1 mmol scale). Yellow oil.

**IR** (KBr):  $\nu = 2925, 2854, 1560, 1480, 1438, 1329, 1213, 1168, 1120, 1040, 935, 774, 701$   $cm^{-1}$ .

**$^1H$  NMR** (400 MHz,  $CDCl_3$ ):  $\delta = 7.74$ –7.65 (m, 4H), 7.57–7.50 (m, 2H), 7.44 (tt,  $J = 7.5, 3.3$  Hz, 4H), 7.39–7.27 (m, 3H), 7.26–7.20 (m, 2H), 7.05 (dd,  $J = 8.3, 3.6$  Hz, 1H), 6.91 (dd,  $J = 8.3, 3.5$  Hz, 1H), 2.40 (s, 3H) ppm.

**$^{19}F$  NMR** (376 MHz,  $CDCl_3$ ):  $\delta = -82.36$  (d,  $J = 3.2$  Hz, 3F),  $-108.59$ – $-108.70$  (m, 2F) ppm.

**$^{31}P$  NMR** (162 MHz,  $CDCl_3$ ):  $\delta = 20.79$  ppm.

**$^{13}C$  NMR** (100 MHz,  $CDCl_3$ ):  $\delta = 154.5$  (d,  $J = 11.0$  Hz), 147.5 (m), 141.3, 140.0, 132.6 (d,  $J = 2.7$  Hz), 132.6, 131.7 (d,  $J = 10.5$  Hz), 131.6, 129.4, 128.7 (d,  $J = 12.8$  Hz), 128.2, 127.3 (d,  $J = 26.2$  Hz), 126.2 (d,  $J = 7.9$  Hz), 120.3, 120.0, 117.2 (m), 12.8 ppm; carbons corresponding to the  $C_2F_5$  group cannot be identified due to C-F coupling.

**HRMS** ( $m/z$ ): calcd for  $C_{29}H_{21}F_5O_2P$   $[M+H]^+$  527.1194, found: 527.1199.

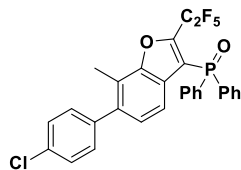

**(6-(4-Chlorophenyl)-7-methyl-2-(perfluoroethyl)benzofuran-3-yl)diphenylphosphine oxide (3ha):**

Yield = 77% (130 mg). Yellow oil.

**IR** (KBr):  $\nu = 3058, 2984, 1560, 1478, 1438, 1329, 1212, 1120, 1089, 1038, 934, 752, 693 \text{ cm}^{-1}$ .

**$^1\text{H NMR}$**  (400 MHz,  $\text{CDCl}_3$ ):  $\delta = 7.68$  (dd,  $J = 12.9, 7.5 \text{ Hz}$ , 4H),  $7.52$  (t,  $J = 7.2 \text{ Hz}$ , 2H),  $7.42$  (td,  $J = 7.6, 3.0 \text{ Hz}$ , 4H),  $7.31$  (d,  $J = 8.3 \text{ Hz}$ , 2H),  $7.15$  (d,  $J = 8.3 \text{ Hz}$ , 2H),  $6.99$  (d,  $J = 8.4 \text{ Hz}$ , 1H),  $6.91$  (d,  $J = 8.4 \text{ Hz}$ , 1H),  $2.37$  (s, 3H) ppm.

**$^{19}\text{F NMR}$**  (376 MHz,  $\text{CDCl}_3$ ):  $\delta = -82.36$  (s, 3F),  $-108.39$ – $109.52$  (m, 2F) ppm.

**$^{31}\text{P NMR}$**  (162 MHz,  $\text{CDCl}_3$ ):  $\delta = 20.80$  ppm.

**$^{13}\text{C NMR}$**  (100 MHz,  $\text{CDCl}_3$ ):  $\delta = 154.4$  (m),  $146.5$  (m),  $139.9, 138.3, 133.5, 132.6, 132.6, 131.6$  (d,  $J = 10.6 \text{ Hz}$ ),  $131.5, 130.6, 128.6$  (d,  $J = 12.9 \text{ Hz}$ ),  $128.4, 126.8, 126.5$  (m),  $120.5, 120.0, 12.7$  ppm; carbons corresponding to the  $\text{C}_2\text{F}_5$  group cannot be identified due to C-F coupling.

**HRMS** ( $m/z$ ): calcd for  $\text{C}_{29}\text{H}_{20}\text{ClF}_5\text{O}_2\text{P}$  [ $\text{M}+\text{H}$ ] $^+$  561.0804, found: 561.0809.

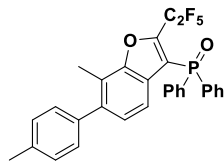

**(7-Methyl-2-(perfluoroethyl)-6-(p-tolyl)benzofuran-3-yl)diphenylphosphine oxide (3ia):**

Yield = 77% (125 mg). Yellow oil.

**IR** (KBr):  $\nu = 3057, 2924, 1560, 1438, 1329, 1212, 1168, 1120, 1039, 935, 811, 727, 694 \text{ cm}^{-1}$ .

**$^1\text{H NMR}$**  (400 MHz,  $\text{CDCl}_3$ ):  $\delta = 7.74$ – $7.64$  (m, 4H),  $7.54$ – $7.48$  (m, 2H),  $7.44$ – $7.37$  (m, 4H),  $7.16$ – $7.09$  (m, 4H),  $7.02$  (dd,  $J = 8.4, 1.3 \text{ Hz}$ , 1H),  $6.85$  (d,  $J = 8.3 \text{ Hz}$ , 1H),  $2.38$  (s, 3H),  $2.31$  (s, 3H) ppm.

**$^{19}\text{F NMR}$**  (376 MHz,  $\text{CDCl}_3$ ):  $\delta = -82.31$ – $82.40$  (m, 3F),  $-108.68$  (d,  $J = 3.1 \text{ Hz}$ , 2F) ppm.

**$^{31}\text{P NMR}$**  (162 MHz,  $\text{CDCl}_3$ ):  $\delta = 20.79$  ppm.

**$^{13}\text{C NMR}$**  (100 MHz,  $\text{CDCl}_3$ ):  $\delta = 154.5$  (d,  $J = 10.6 \text{ Hz}$ ),  $146.3$  (m),  $141.2, 137.1, 137.0, 132.7, 132.6$  (d,  $J = 3.0 \text{ Hz}$ ),  $131.7$  (d,  $J = 10.5 \text{ Hz}$ ),  $129.2, 128.9, 128.7$  (d,  $J = 12.9 \text{ Hz}$ ),  $127.1, 126.0$  (d,  $J = 7.8 \text{ Hz}$ ),  $120.2, 119.9, 117.1$  (m),  $21.1, 12.7$  ppm; carbons corresponding to the  $\text{C}_2\text{F}_5$  group cannot be identified due to C-F coupling.

**HRMS** ( $m/z$ ): calcd for  $\text{C}_{30}\text{H}_{23}\text{F}_5\text{O}_2\text{P}$  [ $\text{M}+\text{H}$ ] $^+$  541.1350, found: 541.1351.

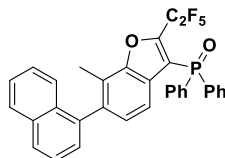

**(7-Methyl-6-(naphthalen-1-yl)-2-(perfluoroethyl)benzofuran-3-yl)diphenylphosphine oxide (3ja):**

Yield = 44% (26 mg, 0.1 mmol scale). Yellow solid. M. p. 121.8–122.2 °C.

**IR** (KBr):  $\nu = 3057, 1560, 1438, 1330, 1214, 1167, 1121, 1036, 932, 780, 725, 694, 552 \text{ cm}^{-1}$ .

**<sup>1</sup>H NMR** (400 MHz, CDCl<sub>3</sub>):  $\delta$  = 7.83 (t,  $J$  = 8.2 Hz, 2H), 7.78–7.68 (m, 4H), 7.55 (t,  $J$  = 7.4 Hz, 2H), 7.49–7.38 (m, 6H), 7.32 (d,  $J$  = 5.9 Hz, 2H), 7.23 (d,  $J$  = 7.0 Hz, 1H), 7.08–6.97 (m, 2H), 2.15 (s, 3H) ppm.

**<sup>19</sup>F NMR** (376 MHz, CDCl<sub>3</sub>):  $\delta$  = -82.30 (s, 3F), -108.54 (s, 2F) ppm.

**<sup>31</sup>P NMR** (162 MHz, CDCl<sub>3</sub>):  $\delta$  = 20.87 ppm.

**<sup>13</sup>C NMR** (100 MHz, CDCl<sub>3</sub>):  $\delta$  = 154.3 (d,  $J$  = 10.5 Hz), 146.0 (m), 139.8, 137.7, 133.5, 132.8 (d,  $J$  = 11.9 Hz), 132.6 (d,  $J$  = 2.5 Hz), 131.8, 131.7, 128.8 (d,  $J$  = 3.5 Hz), 128.7 (d,  $J$  = 3.8 Hz), 128.2 (d,  $J$  = 28.6 Hz), 127.7, 127.1, 126.6, 126.5, 126.1 (d,  $J$  = 33.6 Hz), 125.8, 125.2, 121.6, 120.3, 117.3 (m), 12.6 ppm; carbons corresponding to the C<sub>2</sub>F<sub>5</sub> group cannot be identified due to C-F coupling.

**HRMS** (m/z): calcd for C<sub>33</sub>H<sub>23</sub>F<sub>5</sub>O<sub>2</sub>P [M+H]<sup>+</sup> 577.1350, found: 577.1354.

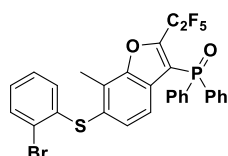

**6-((2-Bromophenyl)thio)-7-methyl-2-(perfluoroethyl)benzofuran-3-yl)diphenylphosphine oxide (3ka):**

Yield = 34% (33 mg, 0.15 mmol scale). Yellow oil.

**IR** (KBr):  $\nu$  = 2963, 1603, 1548, 1438, 1325, 1197, 1119, 1072, 979, 744, 725, 693, 575 cm<sup>-1</sup>.

**<sup>1</sup>H NMR** (400 MHz, CDCl<sub>3</sub>):  $\delta$  = 7.64–7.57 (m, 4H), 7.56–7.49 (m, 3H), 7.44–7.37 (m, 4H), 7.32 (d,  $J$  = 1.6 Hz, 1H), 7.18–7.13 (m, 1H), 7.08–7.02 (m, 3H), 2.30 (s, 3H) ppm.

**<sup>19</sup>F NMR** (376 MHz, CDCl<sub>3</sub>):  $\delta$  = -81.71 (s, 3F), -104.47 (s, 2F) ppm.

**<sup>31</sup>P NMR** (162 MHz, CDCl<sub>3</sub>):  $\delta$  = 22.32 ppm.

**<sup>13</sup>C NMR** (100 MHz, CDCl<sub>3</sub>):  $\delta$  = 155.3 (d,  $J$  = 11.8 Hz), 146.0 (m), 136.5 (d,  $J$  = 13.5 Hz), 134.7, 133.4, 133.1, 132.6 (d,  $J$  = 3.8 Hz), 132.1, 132.0, 130.6, 128.6, 128.5 (d,  $J$  = 13.2 Hz), 128.1, 126.7 (d,  $J$  = 7.4 Hz), 125.1, 118.6, 118.1 (m), 117.6, 112.1, 22.6 ppm; carbons corresponding to the C<sub>2</sub>F<sub>5</sub> group cannot be identified due to C-F coupling.

**HRMS** (m/z): calcd for C<sub>29</sub>H<sub>20</sub>BrF<sub>5</sub>O<sub>2</sub>PS [M+H]<sup>+</sup> 637.0020, found: 637.0018.

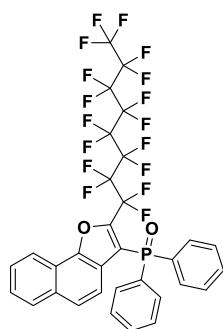

**2-(Perfluorooctyl)naphtho[1,2-*b*]furan-3-yl)diphenylphosphine oxide (3ma):**

Yield = 85% (201 mg). Yellow solid. M.p. 95.2–96.6 °C.

**IR** (KBr):  $\nu$  = 3058, 1745, 1545, 1440, 1205, 1145, 992, 804, 725 cm<sup>-1</sup>.

**<sup>1</sup>H NMR** (400 MHz, CDCl<sub>3</sub>):  $\delta$  = 8.34 (d,  $J$  = 8.1 Hz, 1H), 7.90 (d,  $J$  = 8.0 Hz, 1H), 7.84–7.73 (m, 4H), 7.69–7.56 (m, 5H), 7.54–7.45 (m, 4H), 7.35 (d,  $J$  = 8.9 Hz, 1H) ppm.

**<sup>19</sup>F NMR** (376 MHz, CDCl<sub>3</sub>):  $\delta$  = -80.74 (t,  $J$  = 9.8 Hz, 3F), -105.28 (t,  $J$  = 13.4 Hz, 2F), -119.89–120.43 (m, 2F), -121.44 (s, 2F), -121.65–122.16 (m, 4F), -122.66 (s, 2F), -125.94–126.36 (m,

2F) ppm.

<sup>31</sup>P NMR (162 MHz, CDCl<sub>3</sub>):  $\delta$  = 21.44 (m) ppm.

<sup>13</sup>C NMR (100 MHz, CDCl<sub>3</sub>):  $\delta$  = 151.6 (d,  $J$  = 10.9 Hz), 145.0 (m), 132.8, 132.5, 132.5, 131.7 (d,  $J$  = 10.6 Hz), 128.7, 128.6, 128.2, 127.3 (d,  $J$  = 10.2 Hz), 125.5, 124.2 (d,  $J$  = 7.5 Hz), 120.5, 120.4, 120.3, 118.5 (d,  $J$  = 104.0 Hz) ppm; carbons corresponding to the C<sub>8</sub>F<sub>17</sub> group cannot be identified due to C-F coupling.

HRMS (m/z): calcd for C<sub>32</sub>H<sub>17</sub>F<sub>17</sub>O<sub>2</sub>P [M+H]<sup>+</sup> 787.0689, found: 787.0695.

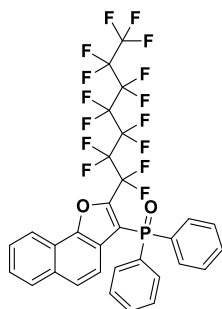

**(2-(Perfluoroheptyl)naphtho[1,2-*b*]furan-3-yl)diphenylphosphine oxide (3na):**

Yield = 70% (155 mg). Yellow solid. M.p. 137.1–138.5 °C.

IR (KBr):  $\nu$  = 3061, 1900, 1590, 1542, 1439, 1238, 1200, 1128, 1011, 874, 804, 701 cm<sup>-1</sup>.

<sup>1</sup>H NMR (400 MHz, CDCl<sub>3</sub>):  $\delta$  = 8.34 (d,  $J$  = 8.1 Hz, 1H), 7.90 (d,  $J$  = 8.1 Hz, 1H), 7.84 – 7.73 (m, 4H), 7.68 – 7.56 (m, 5H), 7.53 – 7.46 (m, 4H), 7.35 (d,  $J$  = 8.9 Hz, 1H) ppm.

<sup>19</sup>F NMR (376 MHz, CDCl<sub>3</sub>):  $\delta$  = -80.73 (q,  $J$  = 10.0 Hz, 3F), -105.26 (t,  $J$  = 13.7 Hz, 2F), -119.90 – -120.34 (m, 2F), -121.47 (s, 2F), -121.92 (s, 2F), -122.65 (s, 2F), -125.89 – -126.21 (m, 2F) ppm.

<sup>31</sup>P NMR (162 MHz, CDCl<sub>3</sub>):  $\delta$  = 21.34 ppm.

<sup>13</sup>C NMR (100 MHz, CDCl<sub>3</sub>):  $\delta$  = 151.6 (d,  $J$  = 11.1 Hz), 144.9 (m), 132.5, 132.5, 132.3 (d,  $J$  = 111.0 Hz), 131.8, 131.7, 128.6 (d,  $J$  = 12.8 Hz), 128.2, 127.3 (d,  $J$  = 10.1 Hz), 125.5, 124.2 (d,  $J$  = 7.6 Hz), 120.5, 120.4, 120.3, 118.5 (d,  $J$  = 104.6 Hz) ppm; carbons corresponding to the C<sub>7</sub>F<sub>15</sub> group cannot be identified due to C-F coupling.

HRMS (m/z): calcd for C<sub>31</sub>H<sub>17</sub>F<sub>15</sub>O<sub>2</sub>P [M+H]<sup>+</sup> 737.0721, found: 737.0729.

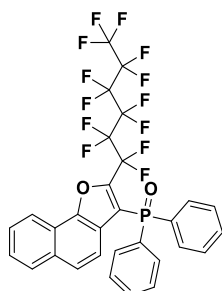

**(2-(Perfluorohexyl)naphtho[1,2-*b*]furan-3-yl)diphenylphosphine oxide (3oa):**

Yield = 85% (175 mg). Yellow solid. M.p. 163.4–164.2 °C.

IR (KBr):  $\nu$  = 3058, 1899, 1542, 1439, 1237, 1200, 1120, 1068, 888, 804 cm<sup>-1</sup>.

<sup>1</sup>H NMR (400 MHz, CDCl<sub>3</sub>):  $\delta$  = 8.34 (d,  $J$  = 8.1 Hz, 1H), 7.89 (d,  $J$  = 8.0 Hz, 1H), 7.84 – 7.74 (m, 4H), 7.68 – 7.55 (m, 5H), 7.54 – 7.45 (m, 4H), 7.33 (d,  $J$  = 8.9 Hz, 1H) ppm.

<sup>19</sup>F NMR (376 MHz, CDCl<sub>3</sub>):  $\delta$  = -80.74 (t,  $J$  = 10.0 Hz, 3F), -105.28 (t,  $J$  = 12.9 Hz, 2F), -119.90

-120.26 (m, 2F), -121.65 (s, 2F), -122.72 (s, 2F), -125.87 – -126.30 (m, 2F) ppm.

<sup>31</sup>P NMR (162 MHz, CDCl<sub>3</sub>): δ = 21.37 ppm.

<sup>13</sup>C NMR (100 MHz, CDCl<sub>3</sub>): δ = 151.6 (m), 144.9 (m), 132.8, 132.5 (d, *J* = 3.2 Hz), 132.5, 131.8, 131.7, 128.6 (d, *J* = 13.0 Hz), 128.2, 127.3 (d, *J* = 10.0 Hz), 125.5, 124.2 (d, *J* = 7.9 Hz), 120.5, 120.4, 120.2, 118.5 (d, *J* = 104.5 Hz) ppm; carbons corresponding to the C<sub>6</sub>F<sub>13</sub> group cannot be identified due to C-F coupling.

HRMS (m/z): calcd for C<sub>30</sub>H<sub>17</sub>F<sub>13</sub>O<sub>2</sub>P [M+H]<sup>+</sup> 687.0753, found: 687.0765.

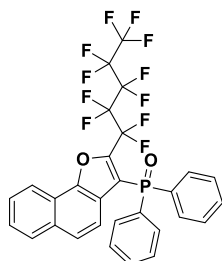

**(2-(Perfluoropentyl)naphtho[1,2-*b*]furan-3-yl)diphenylphosphine oxide (3pa):**

Yield = 66% (42 mg, 0.1 mmol scale). Yellow solid. M.p. 131.4–132.6 °C.

IR (KBr): ν = 3058, 1818, 1550, 1438, 1234, 1203, 1142, 1026, 790, 723 cm<sup>-1</sup>.

<sup>1</sup>H NMR (400 MHz, CDCl<sub>3</sub>): δ = 8.35 (d, *J* = 8.2 Hz, 1H), 7.91 (d, *J* = 8.0 Hz, 1H), 7.82 – 7.73 (m, 4H), 7.69 – 7.64 (m, 1H), 7.64 – 7.56 (m, 4H), 7.54 – 7.45 (m, 4H), 7.33 (d, *J* = 8.9 Hz, 1H) ppm.

<sup>19</sup>F NMR (376 MHz, CDCl<sub>3</sub>): δ = -80.06 – -81.14 (m, 3F), -104.48 – -106.25 (m, 2F), -119.38 – -120.83 (m, 2F), -121.64 – -123.11 (m, 2F), -125.31 – -127.02 (m, 2F) ppm.

<sup>31</sup>P NMR (162 MHz, CDCl<sub>3</sub>): δ = 21.31 ppm.

<sup>13</sup>C NMR (100 MHz, CDCl<sub>3</sub>): δ = 151.6 (m), 145.0 (m), 132.8, 132.5 (d, *J* = 3.0 Hz), 131.8, 131.7, 128.7, 128.6, 128.2, 127.3 (d, *J* = 9.7 Hz), 125.5, 124.2 (d, *J* = 7.4 Hz), 120.5, 120.5, 120.3, 118.5 (m) ppm; carbons corresponding to the C<sub>5</sub>F<sub>11</sub> group cannot be identified due to C-F coupling.

HRMS (m/z): calcd for C<sub>29</sub>H<sub>17</sub>F<sub>11</sub>O<sub>2</sub>P [M+H]<sup>+</sup> 637.0785, found: 637.0793.

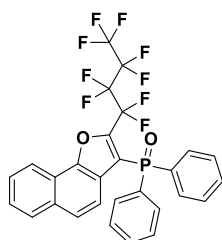

**(2-(Perfluorobutyl)naphtho[1,2-*b*]furan-3-yl)diphenylphosphine oxide (3qa):**

Yield = 59% (104 mg). Yellow solid. M.p. 98.9–99.5 °C.

IR (KBr): ν = 3057, 1592, 1542, 1438, 1244, 1198, 1135, 1072, 826, 700 cm<sup>-1</sup>.

<sup>1</sup>H NMR (400 MHz, CDCl<sub>3</sub>): δ = 8.34 (d, *J* = 8.1 Hz, 1H), 7.90 (d, *J* = 8.0 Hz, 1H), 7.83 – 7.74 (m, 4H), 7.68 – 7.56 (m, 5H), 7.53 – 7.46 (m, 4H), 7.32 (d, *J* = 8.9 Hz, 1H) ppm.

<sup>19</sup>F NMR (376 MHz, CDCl<sub>3</sub>): δ = -80.85 (t, *J* = 10.2 Hz, 3F), -104.12 – -106.41 (m, 2F), -120.00 – -122.17 (m, 2F), -124.90 – -126.98 (m, 2F) ppm.

<sup>31</sup>P NMR (162 MHz, CDCl<sub>3</sub>): δ = 21.34 ppm.

<sup>13</sup>C NMR (100 MHz, CDCl<sub>3</sub>): δ = 151.6 (m), 144.9 (m), 132.8, 132.5 (d, *J* = 3.1 Hz), 132.4, 131.8, 131.7, 128.6 (d, *J* = 13.0 Hz), 128.2, 127.3 (d, *J* = 9.9 Hz), 125.5, 124.2 (m), 120.5, 120.4, 120.2,

118.5 (d,  $J = 104.5$  Hz) ppm; carbons corresponding to the  $C_4F_9$  group cannot be identified due to C-F coupling.

**HRMS** ( $m/z$ ): calcd for  $C_{28}H_{17}F_9O_2P$   $[M+H]^+$  587.0817, found: 587.0822.

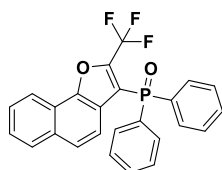

**Diphenyl(2-(trifluoromethyl)naphtho[1,2-*b*]furan-3-yl)phosphine oxide (3ra):**

Yield = 45% (59 mg). White solid. M.p. 87.6–88.9 °C.

**IR** (KBr):  $\nu = 3055, 1557, 1438, 1333, 1209, 1154, 1131, 997, 695, 571$   $cm^{-1}$ .

**$^1H$  NMR** (400 MHz,  $CDCl_3$ ):  $\delta = 8.39 - 8.33$  (m, 1H), 7.90 (d,  $J = 8.0$  Hz, 1H), 7.83 – 7.75 (m, 4H), 7.67 – 7.57 (m, 5H), 7.54 – 7.48 (m, 4H), 7.20 (d,  $J = 8.9$  Hz, 1H) ppm.

**$^{19}F$  NMR** (376 MHz,  $CDCl_3$ ):  $\delta = -58.91$  (d,  $J = 1.3$  Hz, 3F) ppm.

**$^{31}P$  NMR** (162 MHz,  $CDCl_3$ ):  $\delta = 20.28$  ppm.

**$^{13}C$  NMR** (100 MHz,  $CDCl_3$ ):  $\delta = 150.4$  (m), 146.2 (m), 132.6 (d,  $J = 3.0$  Hz), 132.5, 131.9 (m), 131.7 (d,  $J = 10.7$  Hz), 128.8 (d,  $J = 12.30$  Hz), 128.3, 127.2 (d,  $J = 6.3$  Hz), 125.6, 124.0 (d,  $J = 7.6$  Hz), 120.6, 120.4, 119.9, 118.7 (q,  $J = 269.1$  Hz), 115.6 (m) ppm.

**HRMS** ( $m/z$ ): calcd for  $C_{25}H_{17}F_3O_2P$   $[M+H]^+$  437.0913, found: 437.0923.

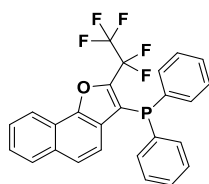

**(2-(Perfluoroethyl)naphtho[1,2-*b*]furan-3-yl)diphenylphosphane (4a):**

Yield = 77% (109 mg, from **3aa**). White solid. M.p. 104.1–105.8 °C.

**IR** (KBr):  $\nu = 3057, 1960, 1816, 1546, 1435, 1334, 1225, 1197, 1127, 930, 744, 697$   $cm^{-1}$ .

**$^1H$  NMR** (400 MHz,  $CDCl_3$ ):  $\delta = 8.34$  (d,  $J = 8.2$  Hz, 1H), 7.81 (d,  $J = 8.1$  Hz, 1H), 7.63 – 7.56 (m, 1H), 7.55 – 7.49 (m, 1H), 7.46 – 7.37 (m, 5H), 7.35 – 7.29 (m, 6H), 6.74 (d,  $J = 8.8$  Hz, 1H) ppm.

**$^{19}F$  NMR** (376 MHz,  $CDCl_3$ ):  $\delta = -83.26 - -83.37$  (m, 3F),  $-119.71 - -120.25$  (m, 2F) ppm.

**$^{31}P$  NMR** (162 MHz,  $CDCl_3$ ):  $\delta = -30.40$  ppm.

**$^{13}C$  NMR** (100 MHz,  $CDCl_3$ ):  $\delta = 152.1$  (m), 146.4 (m), 135.0 (m), 133.9 (d,  $J = 16.8$  Hz), 132.6 (d,  $J = 19.4$  Hz), 132.2, 128.9, 128.7, 128.7, 128.1, 126.9 (d,  $J = 9.2$  Hz), 124.8 (m), 124.5, 121.1, 120.4, 119.9 (d,  $J = 30.9$  Hz) ppm; carbons corresponding to the  $C_2F_5$  group cannot be identified due to C-F coupling.

**HRMS** ( $m/z$ ): calcd for  $C_{26}H_{17}F_5OP$   $[M+H]^+$  471.0932, found: 471.0940.

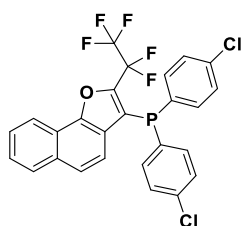



**Bis(4-chlorophenyl)(2-(perfluoroethyl)naphtho[1,2-*b*]furan-3-yl)phosphane (4b):**

Yield = 92% (149 mg, from **3ab**). White solid. M.p. 121.2–122.1 °C.

**IR** (KBr):  $\nu = 3059, 2924, 1903, 1575, 1480, 1315, 1221, 1206, 1128, 1013, 806, 741 \text{ cm}^{-1}$ .

**<sup>1</sup>H NMR** (400 MHz, CDCl<sub>3</sub>):  $\delta = 8.38 - 8.32$  (m, 1H), 7.86 (d,  $J = 8.1$  Hz, 1H), 7.66 – 7.60 (m, 1H), 7.59 – 7.53 (m, 1H), 7.47 (d,  $J = 8.8$  Hz, 1H), 7.36 – 7.29 (m, 8H), 6.76 (d,  $J = 8.8$  Hz, 1H) ppm.

**<sup>19</sup>F NMR** (376 MHz, CDCl<sub>3</sub>):  $\delta = -82.50 - -84.10$  (m, 3F),  $-108.67 - -116.57$  (m, 2F) ppm.

**<sup>31</sup>P NMR** (162 MHz, CDCl<sub>3</sub>):  $\delta = -31.54$  ppm.

**<sup>13</sup>C NMR** (100 MHz, CDCl<sub>3</sub>):  $\delta = 152.2$  (m), 146.5 (m), 135.5 (m), 133.9, 133.7, 133.1 (m), 132.3, 129.1 (d,  $J = 6.7$  Hz), 128.2, 127.2 (d,  $J = 8.7$  Hz), 125.0, 124.2 (m), 121.1, 120.5, 119.8, 118.7 (d,  $J = 30.0$  Hz) ppm; carbons corresponding to the C<sub>2</sub>F<sub>5</sub> group cannot be identified due to C-F coupling.

**HRMS** (m/z): calcd for C<sub>26</sub>H<sub>15</sub>Cl<sub>2</sub>F<sub>5</sub>OP [M+H]<sup>+</sup> 539.0152, found: 539.0161.

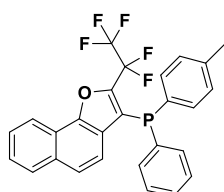**(2-(Perfluoroethyl)naphtho[1,2-*b*]furan-3-yl)(phenyl)(*p*-tolyl)phosphane (4c):**

Yield = 78% (113 mg, from **3ak**). White solid. M.p. 101.4–102.7 °C.

**IR** (KBr):  $\nu = 3017, 2925, 1435, 1314, 1216, 1205, 1130, 931, 808, 696 \text{ cm}^{-1}$ .

**<sup>1</sup>H NMR** (400 MHz, CDCl<sub>3</sub>):  $\delta = 8.36 - 8.29$  (m, 1H), 7.81 (d,  $J = 8.1$  Hz, 1H), 7.62 – 7.57 (m, 1H), 7.55 – 7.49 (m, 1H), 7.43 – 7.37 (m, 3H), 7.36 – 7.29 (m, 5H), 7.17 – 7.11 (m, 2H), 6.77 (d,  $J = 8.8$  Hz, 1H), 2.33 (s, 3H) ppm.

**<sup>19</sup>F NMR** (376 MHz, CDCl<sub>3</sub>):  $\delta = -82.75 - -83.80$  (m, 3F),  $-109.18 - -110.88$  (m, 2F) ppm.

**<sup>31</sup>P NMR** (162 MHz, CDCl<sub>3</sub>):  $\delta = -30.96$  ppm.

**<sup>13</sup>C NMR** (100 MHz, CDCl<sub>3</sub>):  $\delta = 152.1$  (m), 146.1 (m), 139.1, 135.5 (m), 132.9 (d,  $J = 20.1$  Hz), 132.4 (d,  $J = 19.0$  Hz), 132.2, 131.1 (m), 129.6 (d,  $J = 7.1$  Hz), 128.7, 128.6, 128.1, 126.9 (d,  $J = 9.6$  Hz), 124.8 (m), 124.5, 121.1, 120.5, 120.5, 120.3, 120.0, 21.3 ppm; carbons corresponding to the C<sub>2</sub>F<sub>5</sub> group cannot be identified due to C-F coupling.

**HRMS** (m/z): calcd for C<sub>27</sub>H<sub>19</sub>F<sub>5</sub>OP [M+H]<sup>+</sup> 485.1088, found: 485.1095.

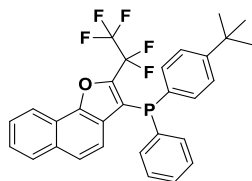**(4-(*tert*-Butyl)phenyl)(2-(perfluoroethyl)naphtho[1,2-*b*]furan-3-yl)(phenyl)phosphane (4d):**

Yield = 72% (114 mg, from **3al**). White solid. M.p. 168.2–169.8 °C.

**IR** (KBr):  $\nu = 3061, 2962, 2868, 1595, 1552, 1436, 1317, 1214, 1133, 1029, 814, 745 \text{ cm}^{-1}$ .

**<sup>1</sup>H NMR** (400 MHz, CDCl<sub>3</sub>):  $\delta = 8.37 - 8.30$  (m, 1H), 7.81 (d,  $J = 8.1$  Hz, 1H), 7.62 – 7.56 (m, 1H), 7.54 – 7.48 (m, 1H), 7.42 – 7.29 (m, 10H), 6.76 (d,  $J = 8.8$  Hz, 1H), 1.29 (s, 9H) ppm.

**<sup>19</sup>F NMR** (376 MHz, CDCl<sub>3</sub>):  $\delta = -82.70 - -83.90$  (m, 3F),  $-108.99 - -111.00$  (m, 2F) ppm.

**<sup>31</sup>P NMR** (162 MHz, CDCl<sub>3</sub>):  $\delta = -31.37$  ppm.

**<sup>13</sup>C NMR** (100 MHz, CDCl<sub>3</sub>):  $\delta$  = 152.2, 152.1 (m), 146.4 (m), 135.6 (m), 132.7 (d,  $J$  = 20.0 Hz), 132.4 (d,  $J$  = 18.9 Hz), 132.2, 131.0 (m), 128.6 (d,  $J$  = 6.3 Hz), 128.6, 128.1, 126.8 (d,  $J$  = 9.3 Hz), 125.8 (d,  $J$  = 7.0 Hz), 124.9 (m), 124.4, 121.1, 120.6, 120.5, 120.4, 120.1, 34.7, 31.2 ppm; carbons corresponding to the C<sub>2</sub>F<sub>5</sub> group cannot be identified due to C-F coupling.

**HRMS** (m/z): calcd for C<sub>30</sub>H<sub>25</sub>F<sub>5</sub>OP [M+H]<sup>+</sup> 527.1558, found: 527.1557.

## 7. References

- [1] (a) P. V. Pham, D. A. Nagib, D. W. C. MacMillan, *Angew. Chem. Int. Ed.* **2011**, *50*, 6119–6122. (b) X. Su, H. Huang, Y. Yuan, Y. Li, *Angew. Chem., Int. Ed.* **2017**, *56*, 1338–1341.
- [2] (a) T. Xie, Y.-W. Zhang, L.-L. Liu, Z.-L. Shen, T.-P. Loh, X.-Q. Chu, *Chem. Commun.* **2018**, *54*, 12722–12725. (b) T. Xie, G.-Q. Wang, Y.-W. Wang, W. Rao, H. Xu, S. Li, Z.-L. Shen, X.-Q. Chu, *iScience* **2020**, *23*, 101259.
- [3] T. Liu, Y. Li, F. Cheng, X. Shen, J. Liu, J. Lin, *Green Chem.* **2019**, *21*, 3536–3541.

## 8. The X-ray crystal structure of product 3aa

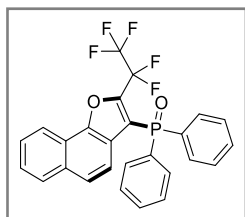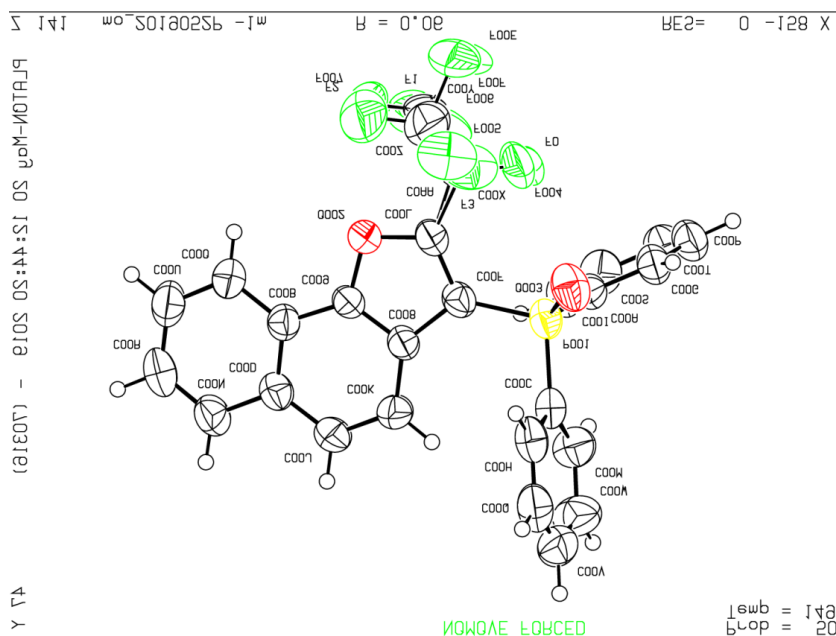

### (2-(Perfluoroethyl)naphtho[1,2-*b*]furan-3-yl)diphenylphosphine oxide

**Crystal Number:** CCDC 1917241

**Cell:** a=10.260(5) b=10.582(5) c=11.990(6)

**Chemical Formula:** C<sub>26</sub>H<sub>16</sub>F<sub>5</sub>O<sub>2</sub>P

alpha=75.682(13)

beta=76.268(12)

**Formula weight:** 486.3778

gamma=62.415(12)

**Space Group:** P -1

## 9. The $^1\text{H}$ , $^{19}\text{F}$ , $^{31}\text{P}$ , and $^{13}\text{C}$ NMR spectra of products

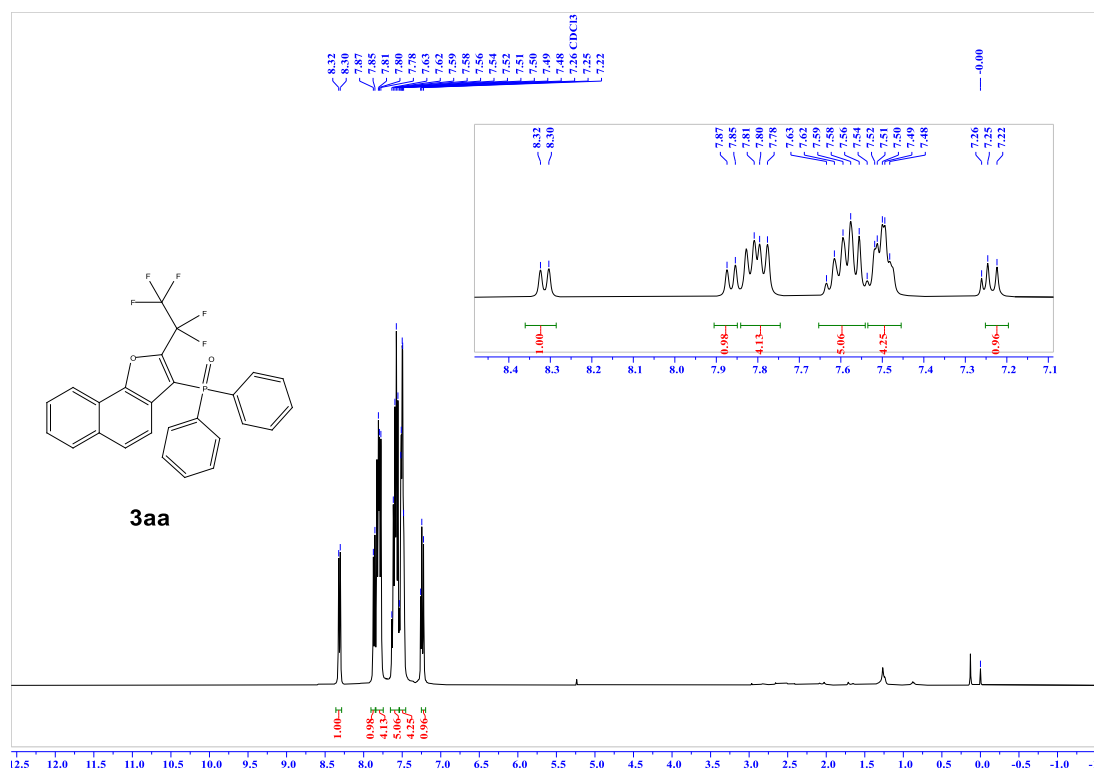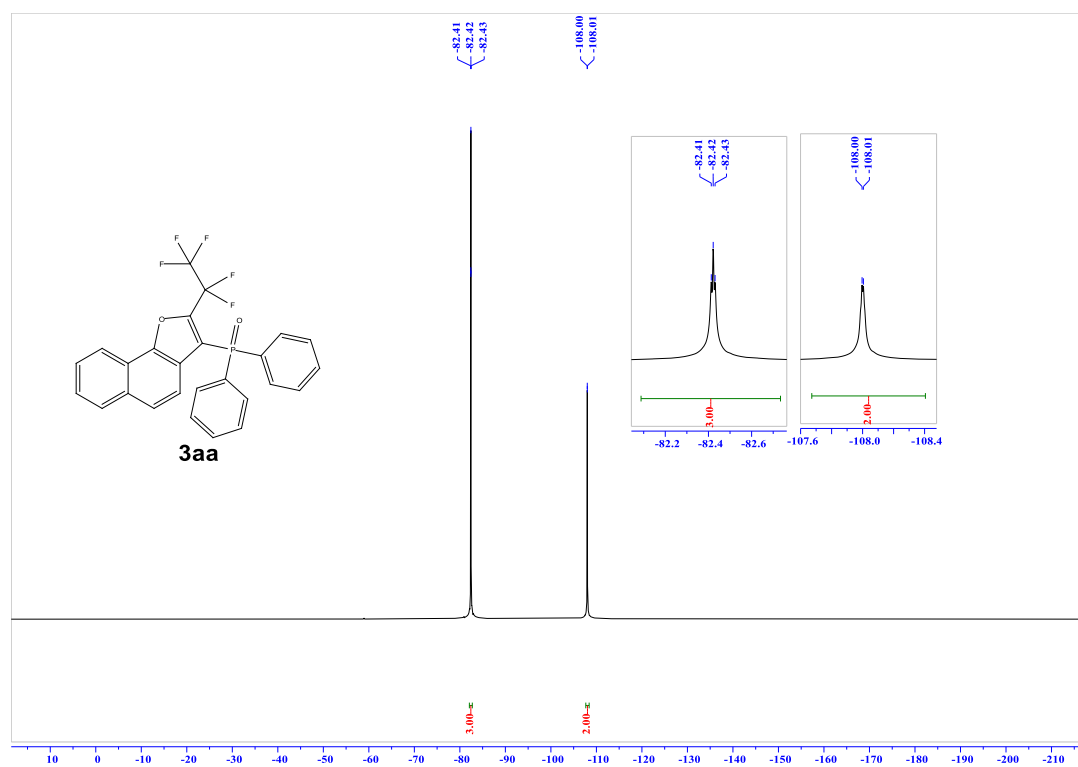

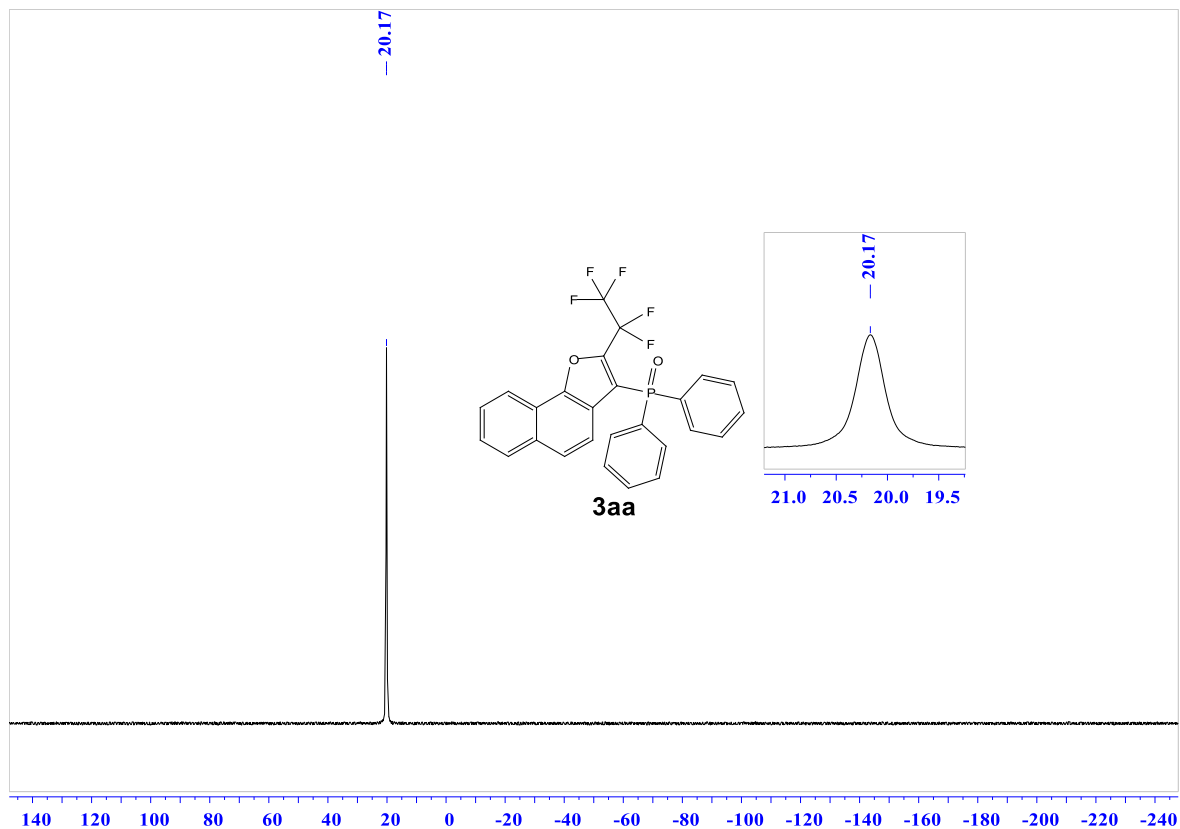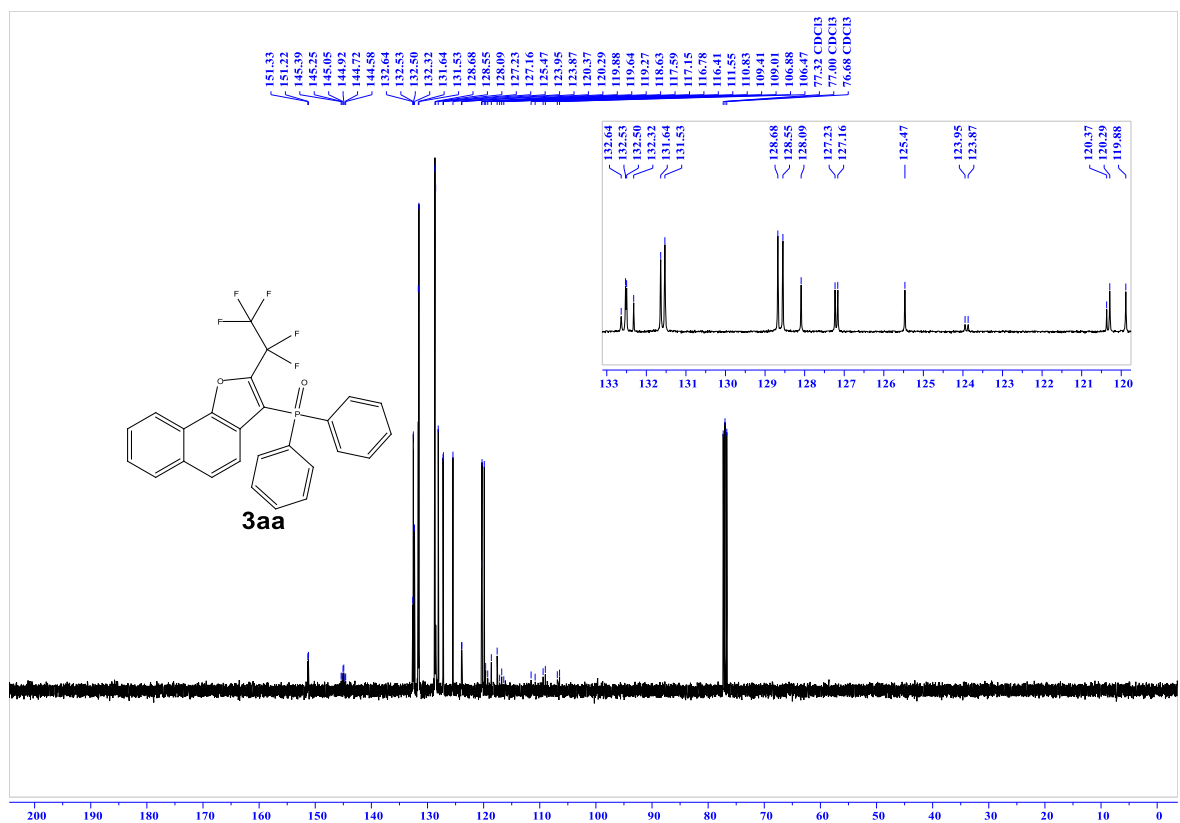

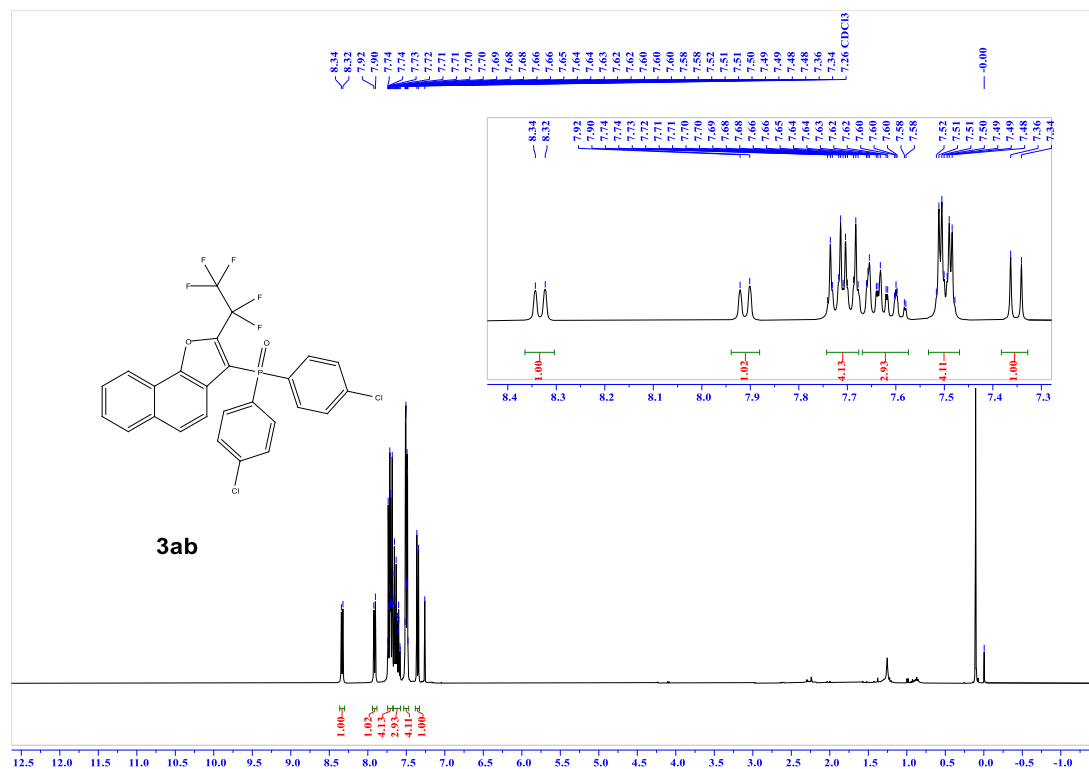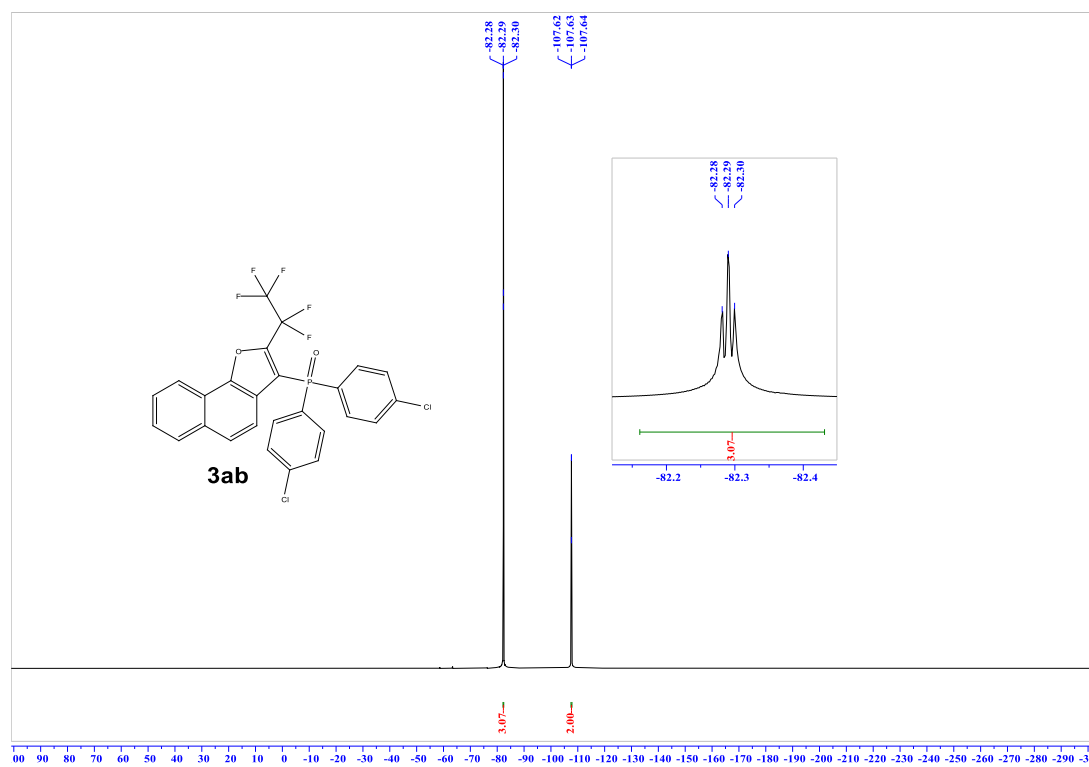

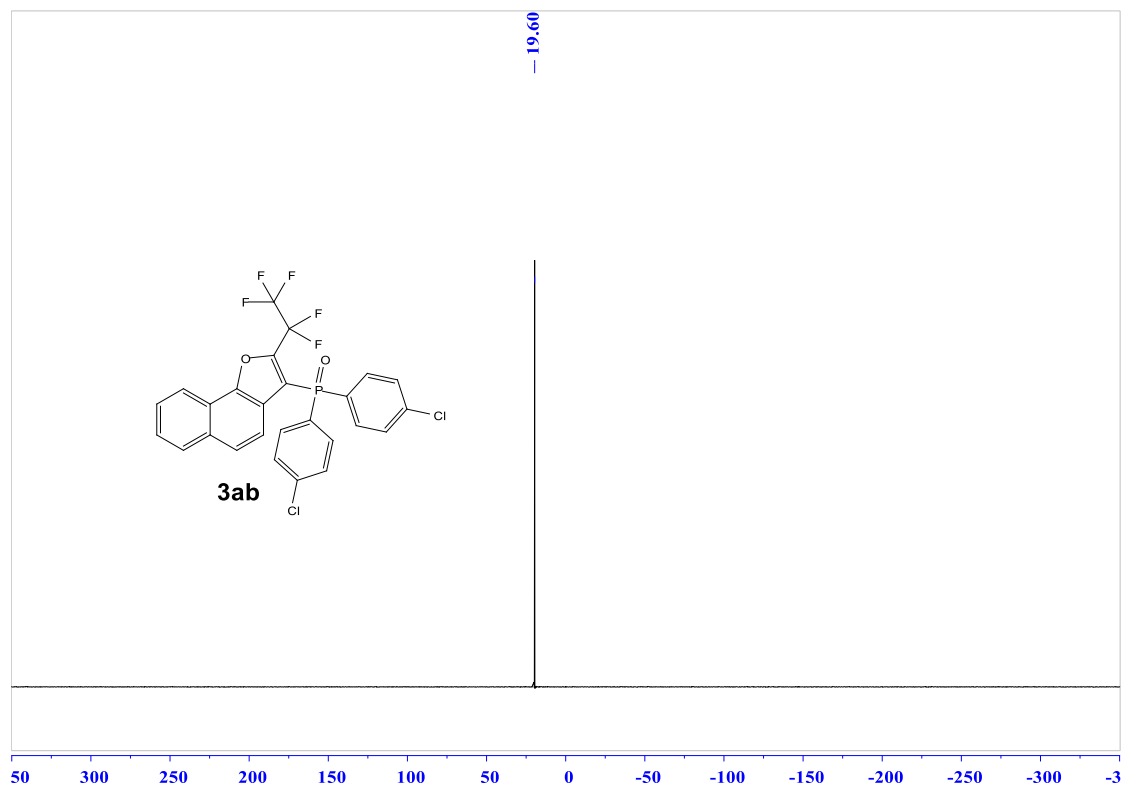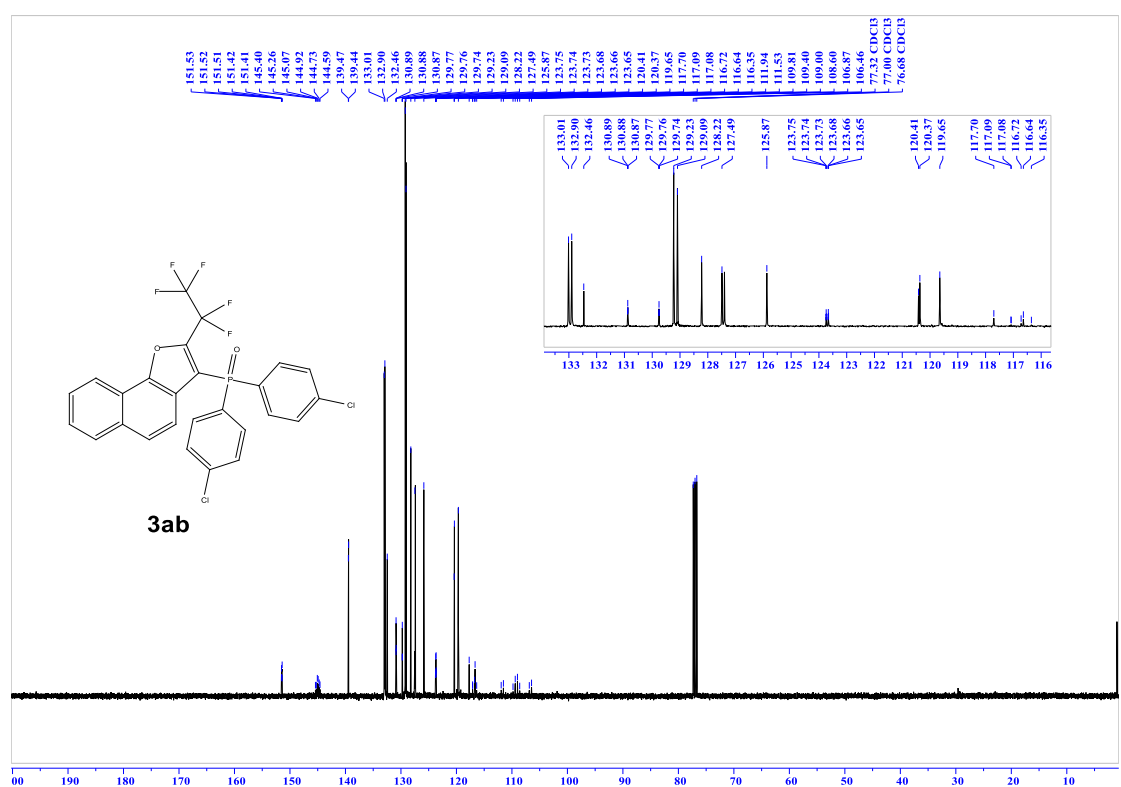

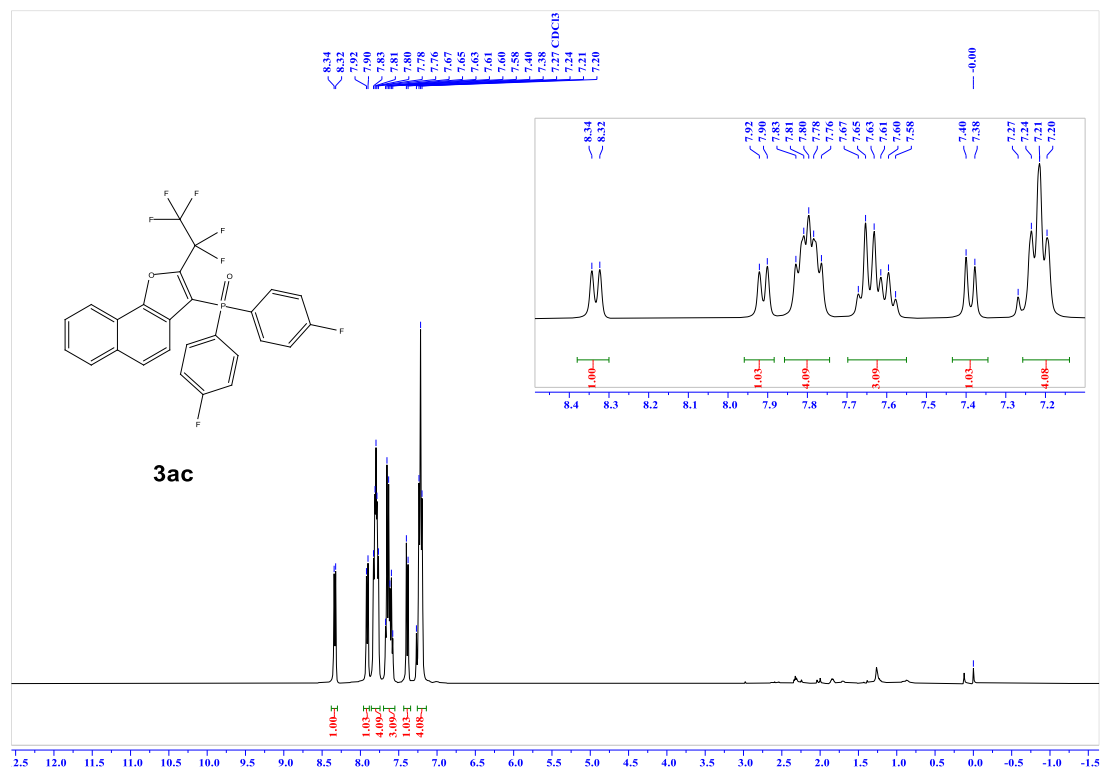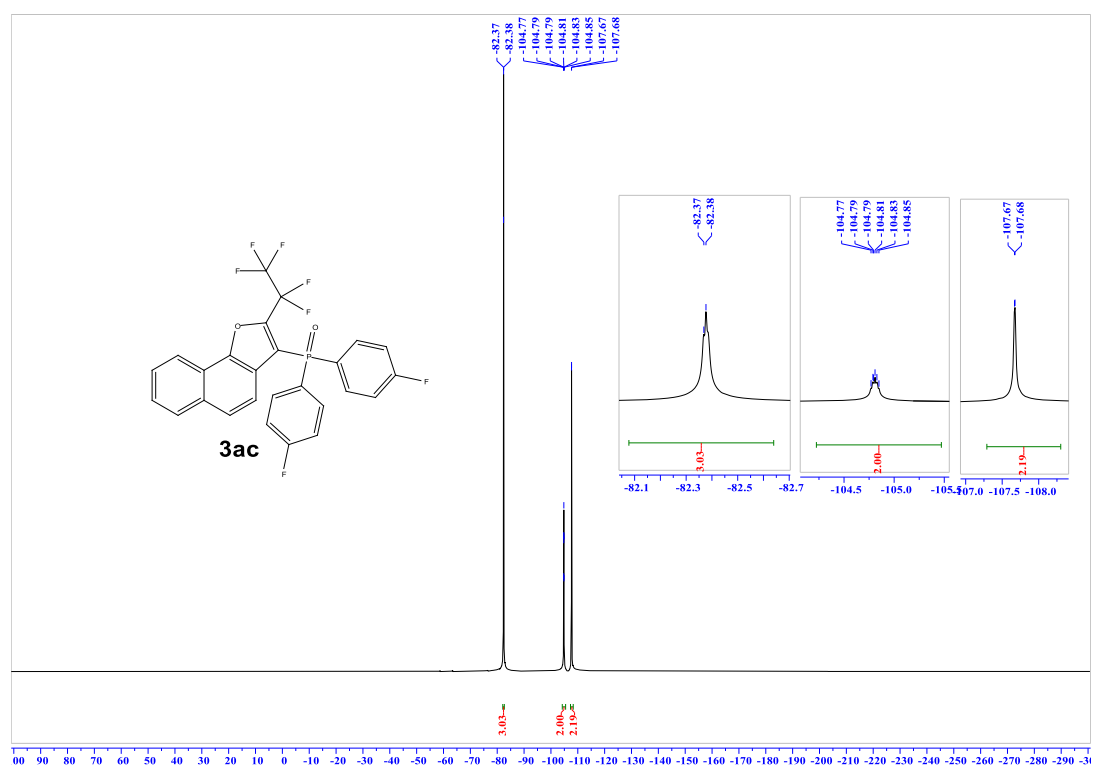



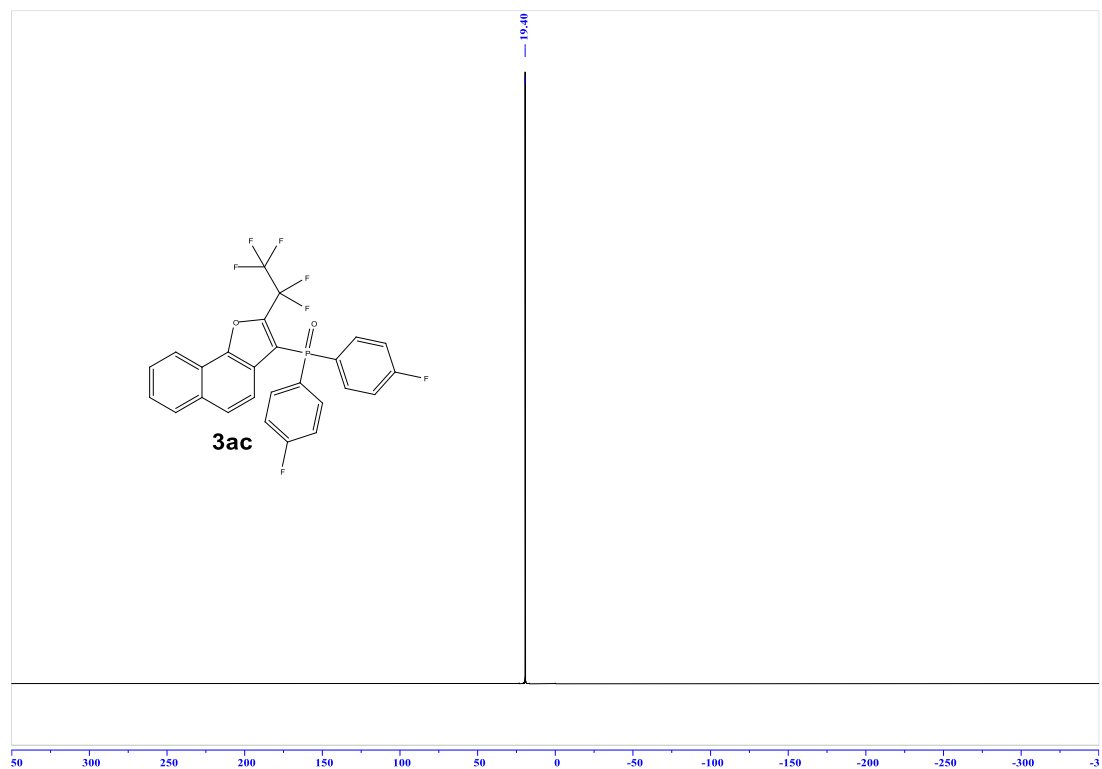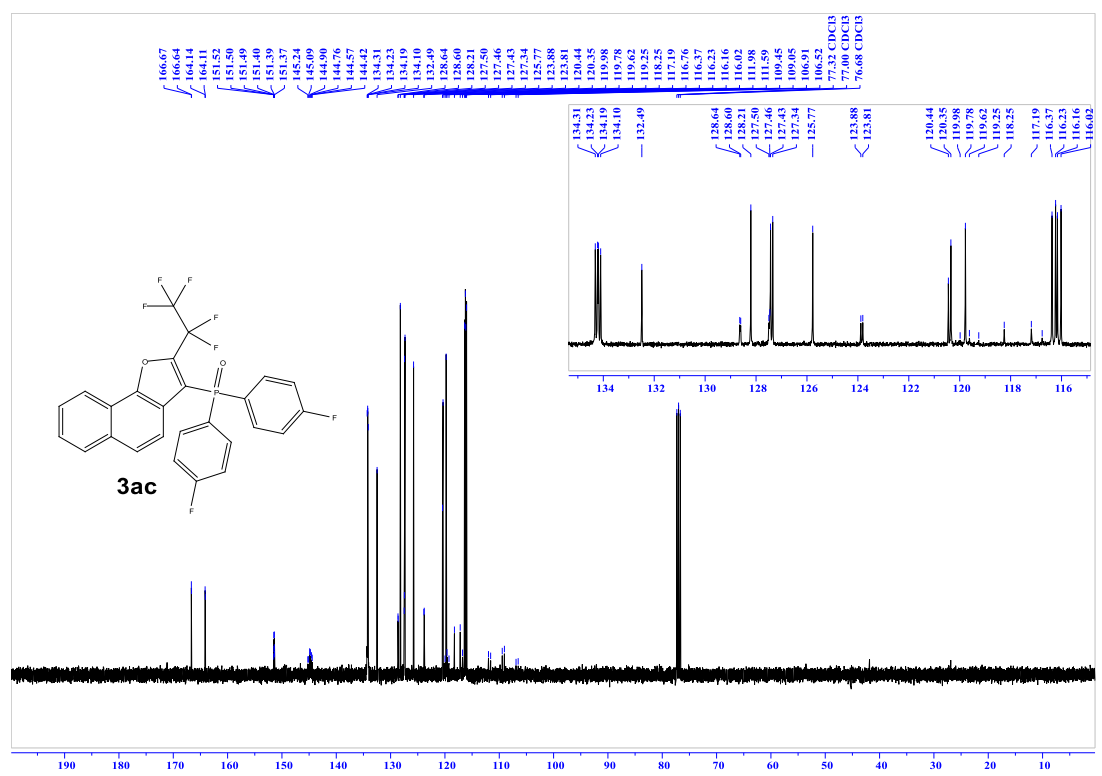

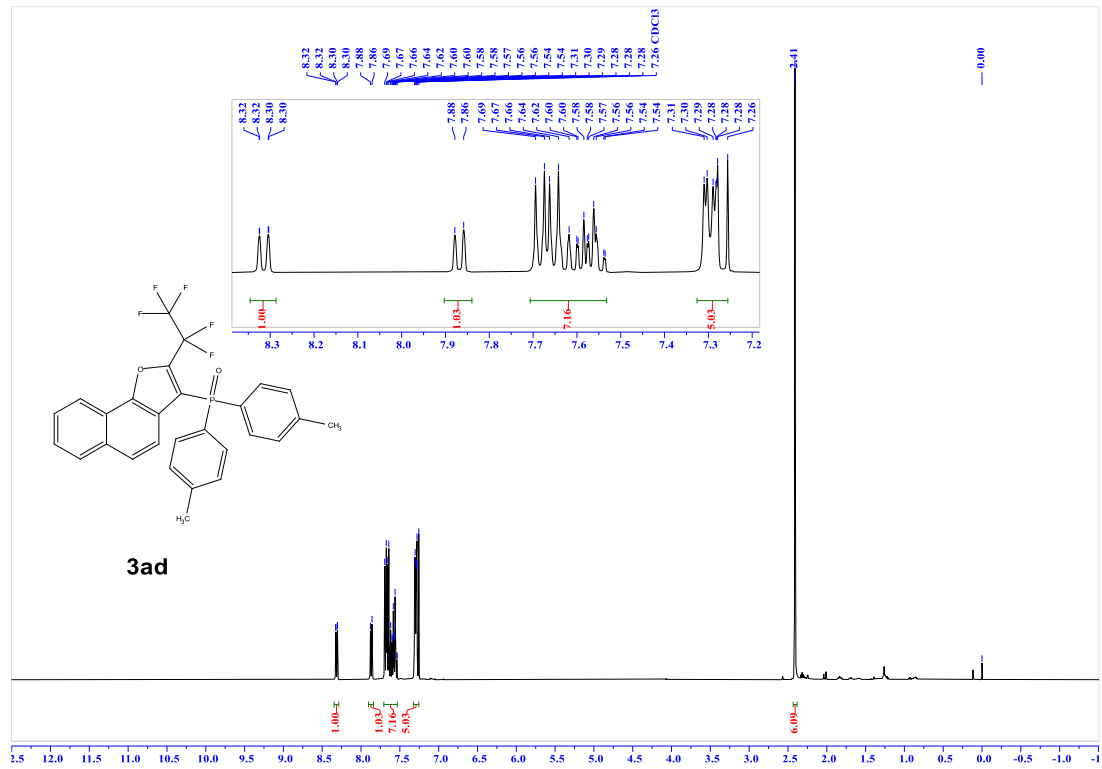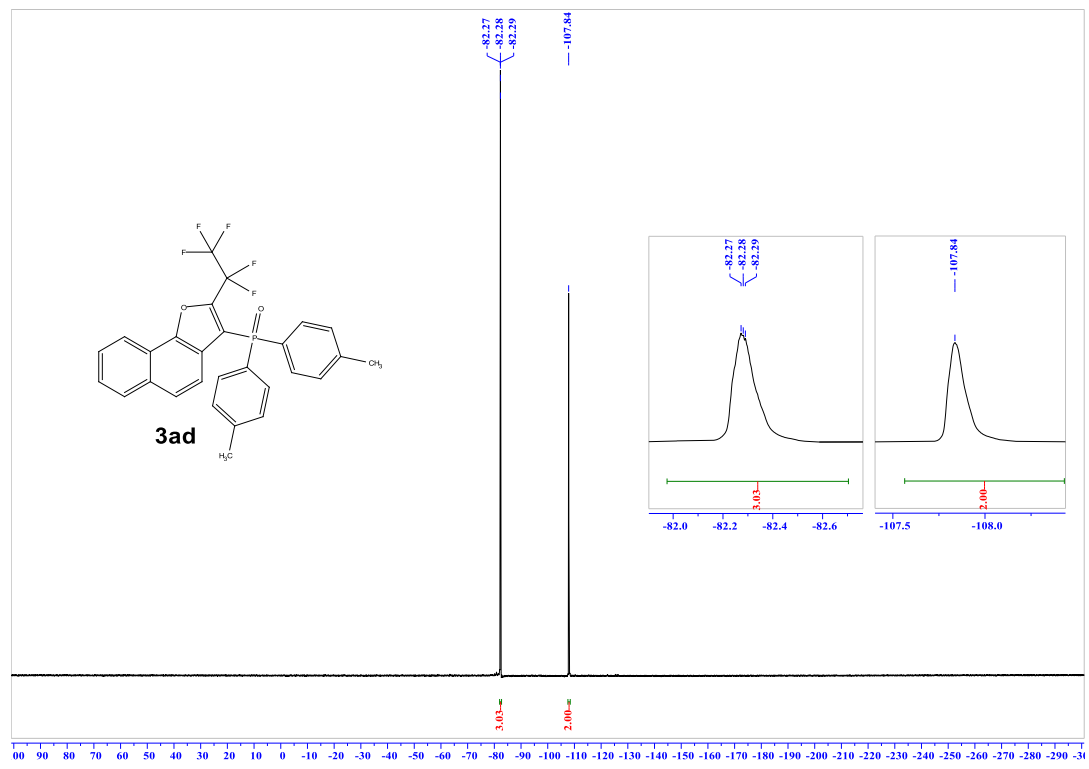

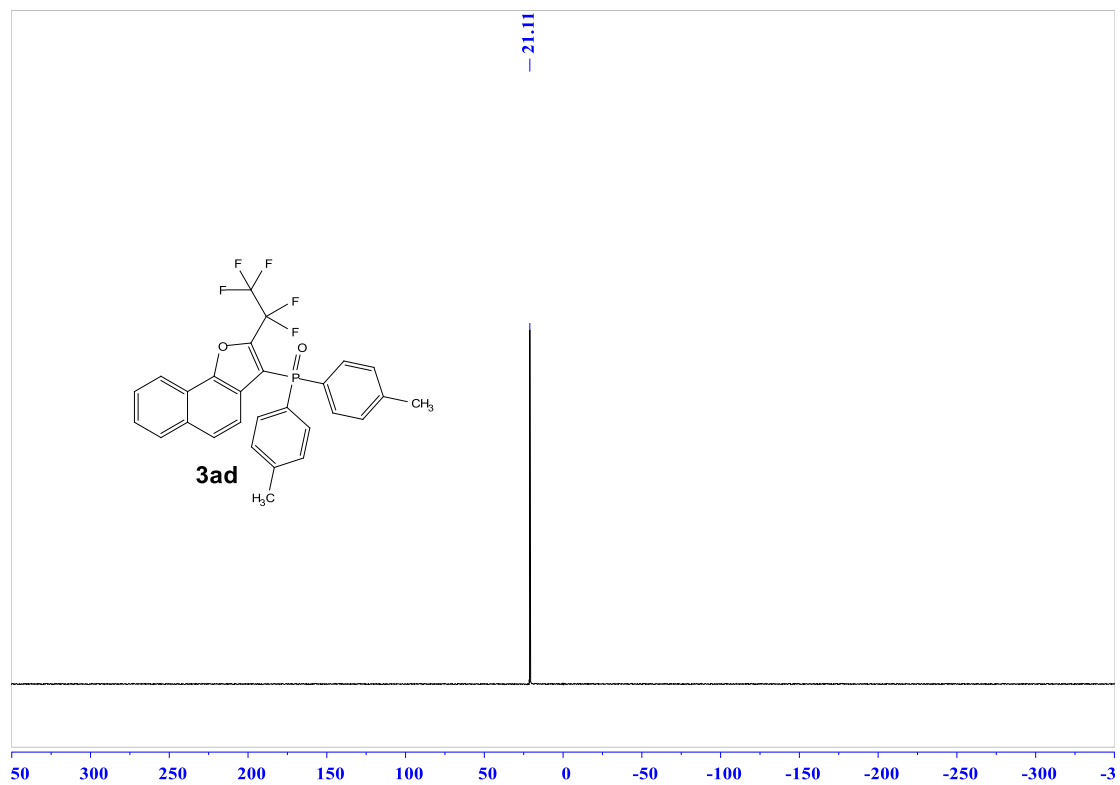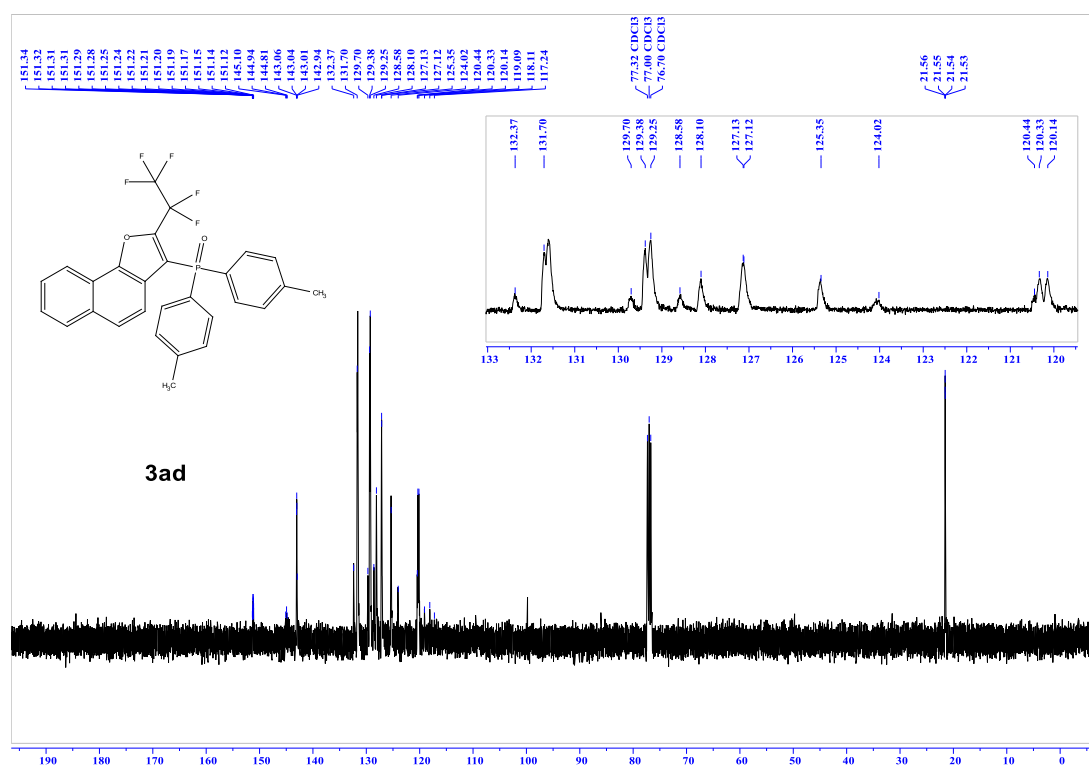

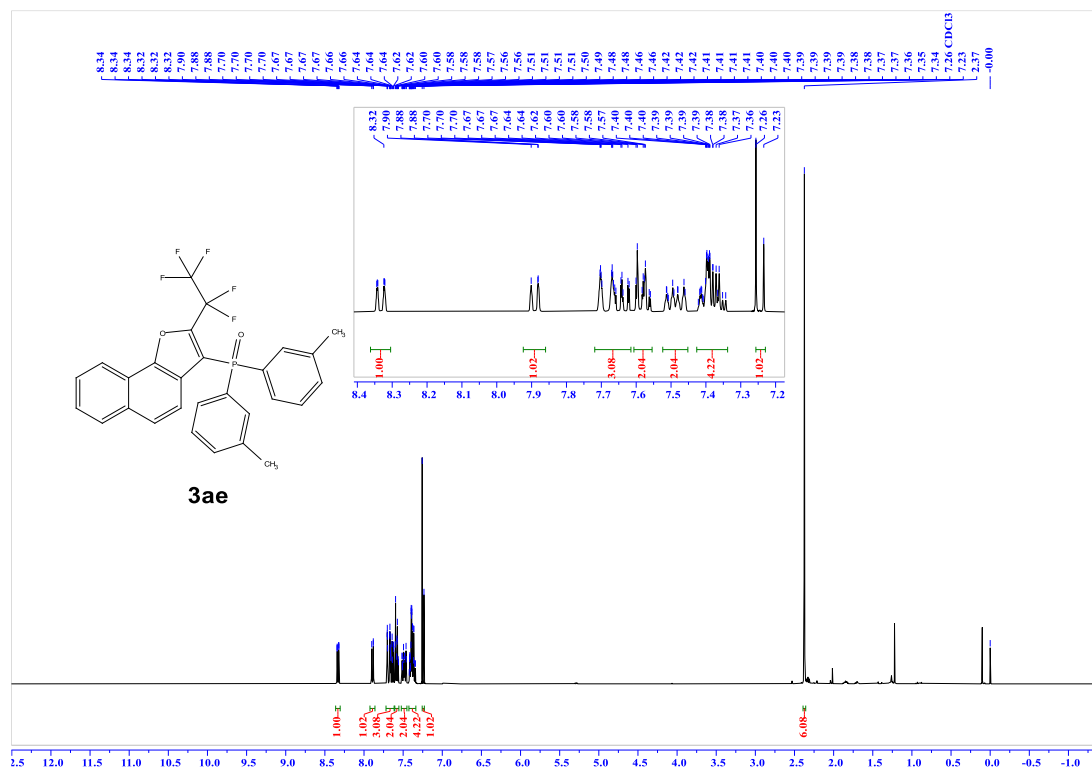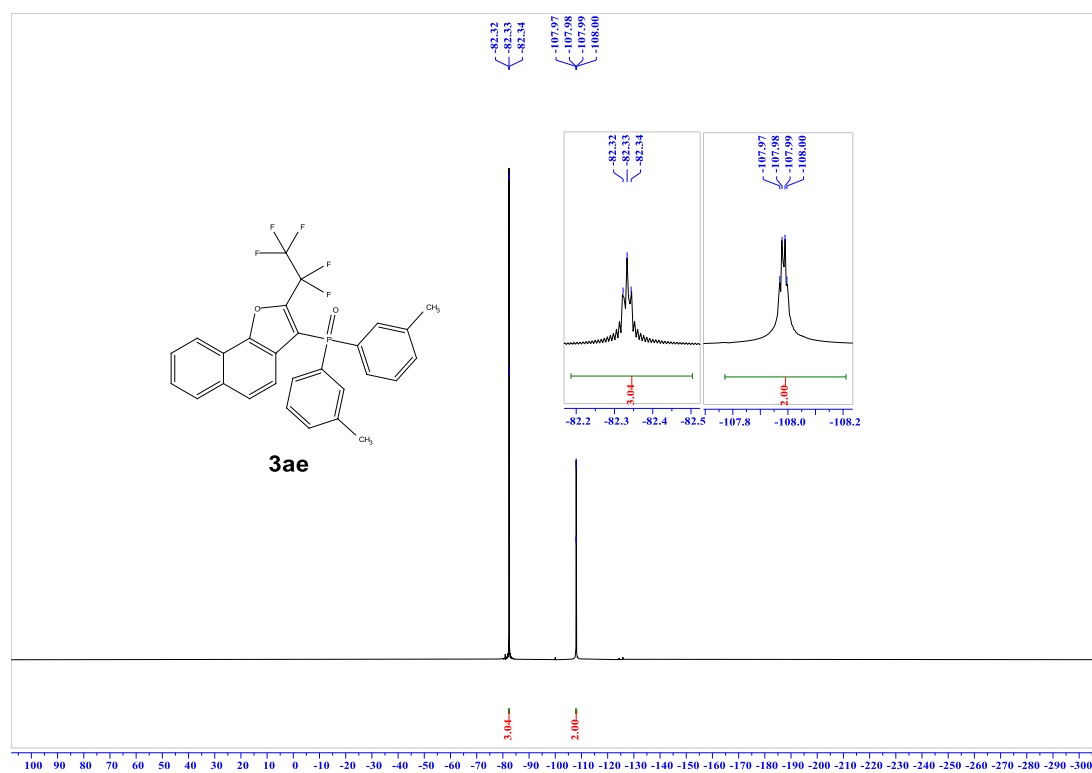

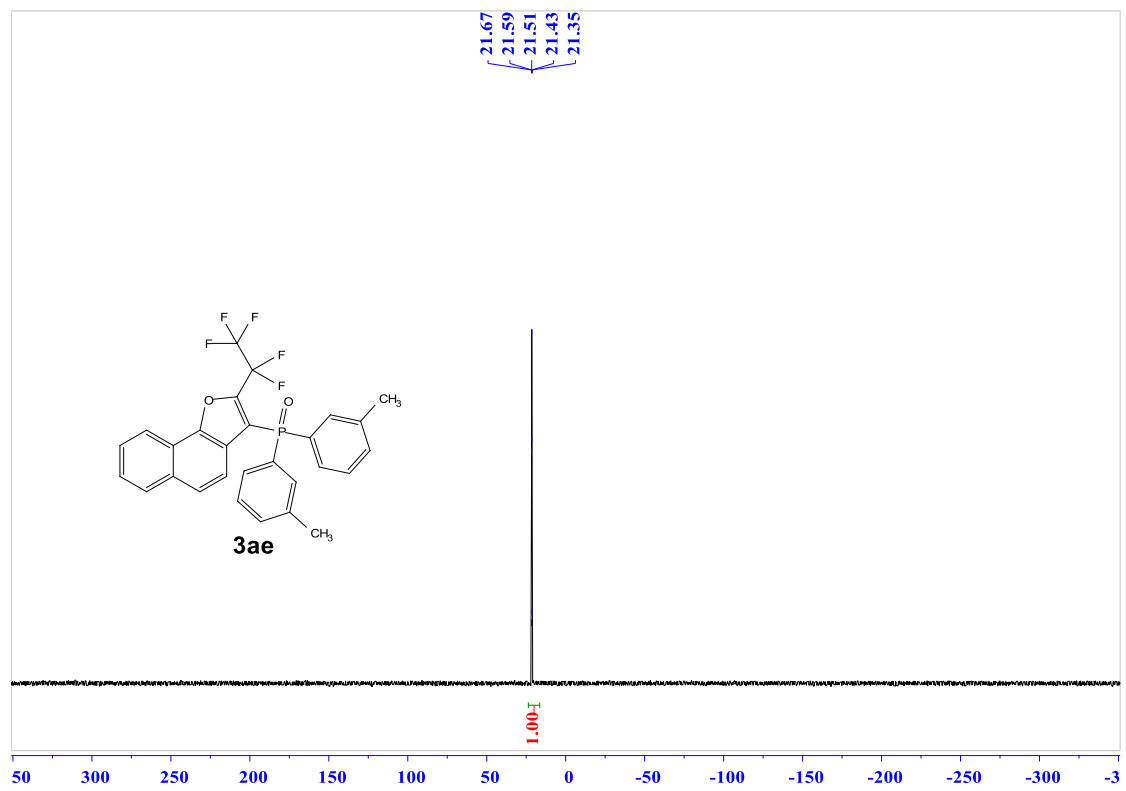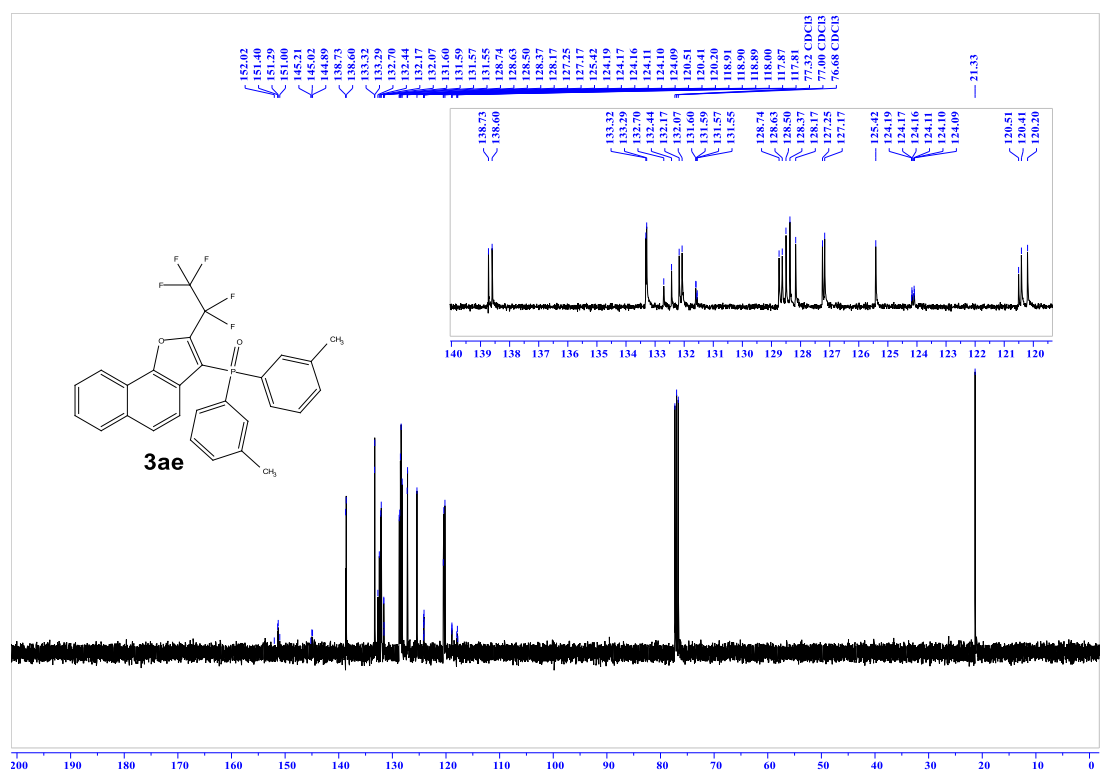

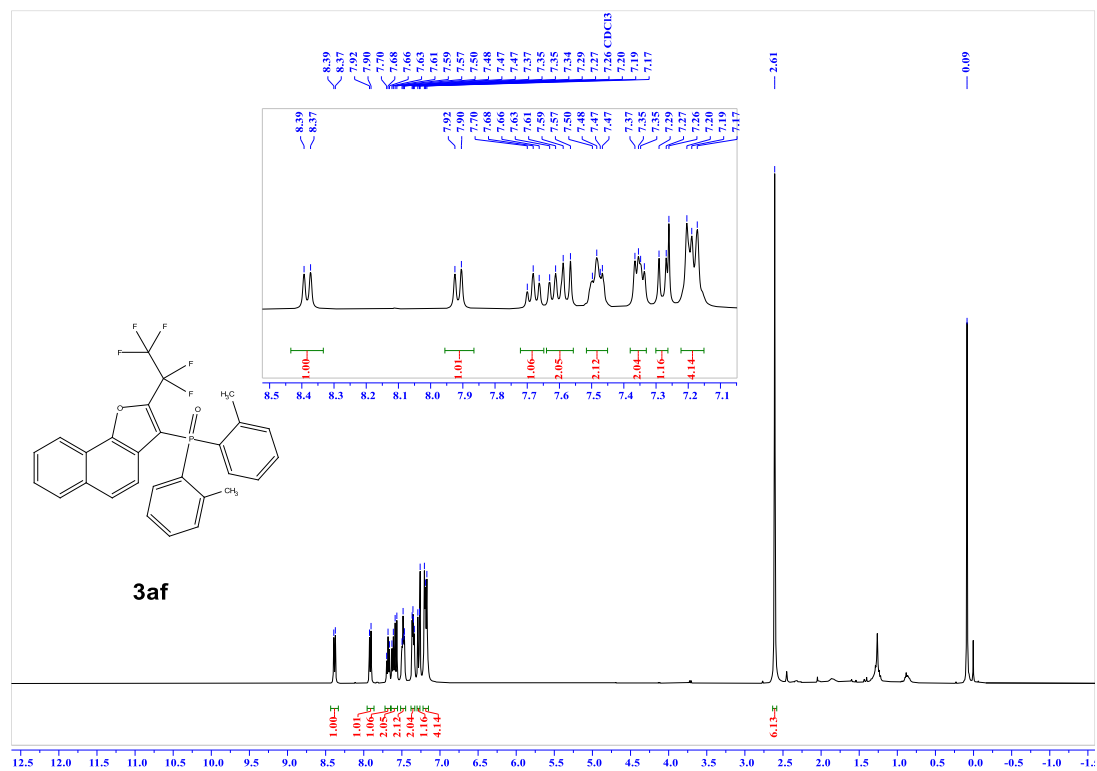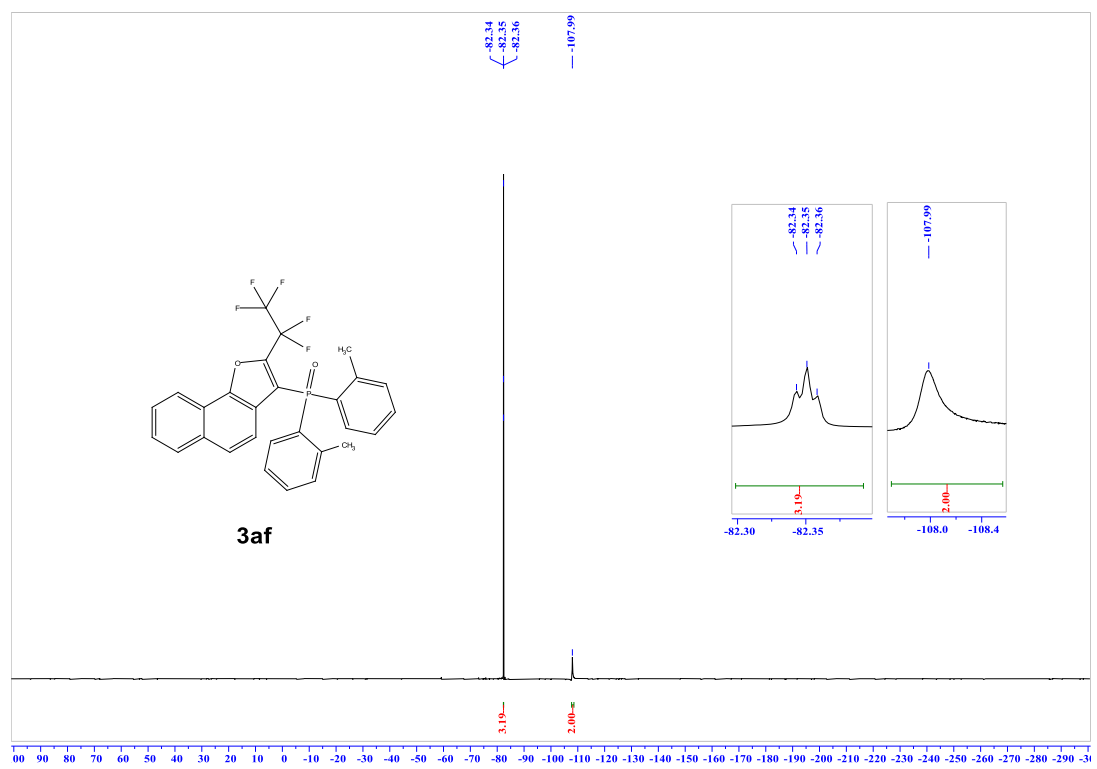

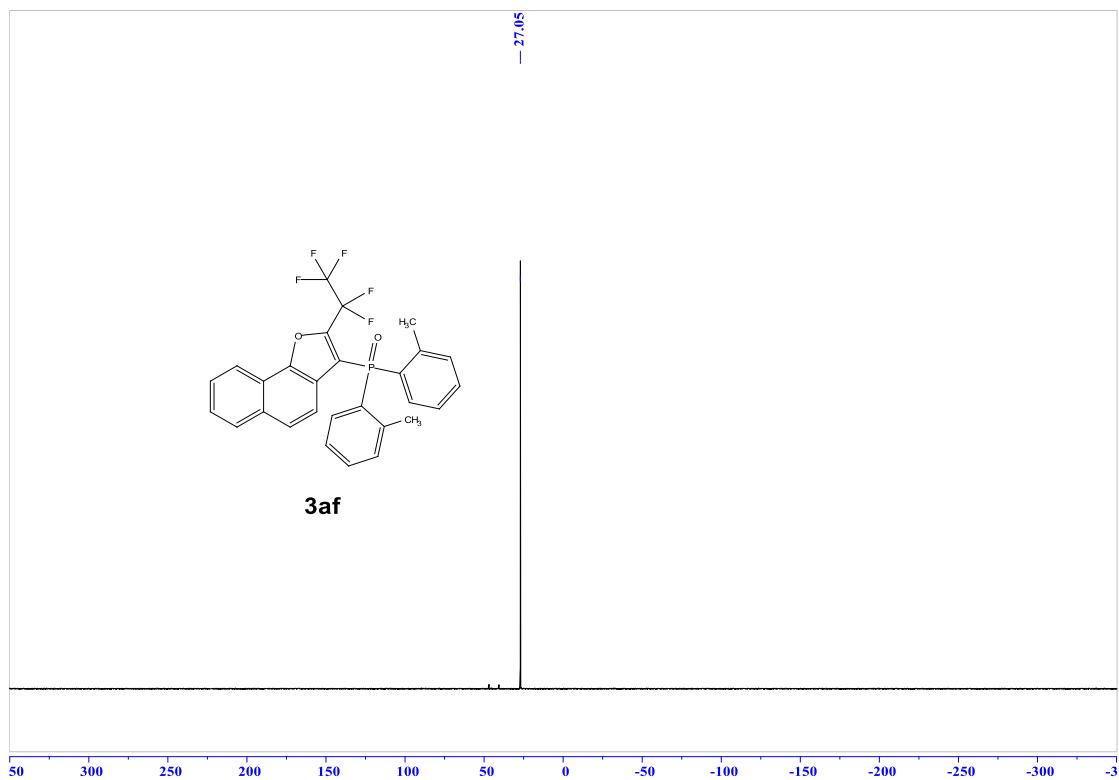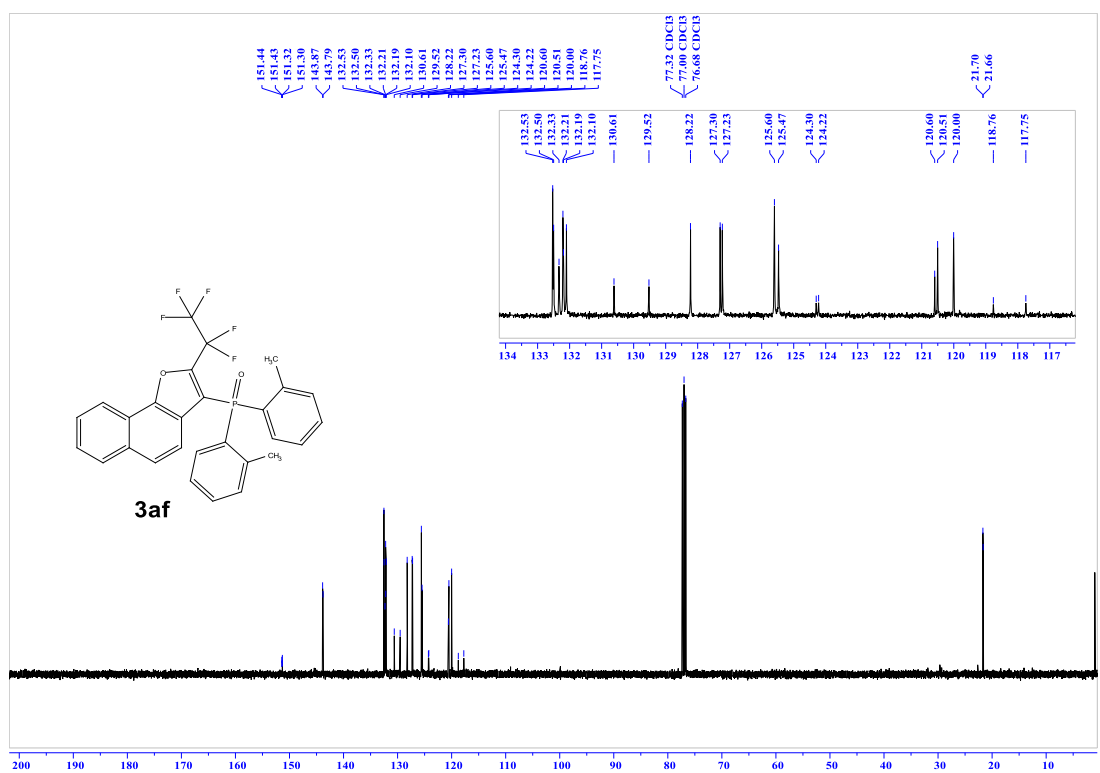

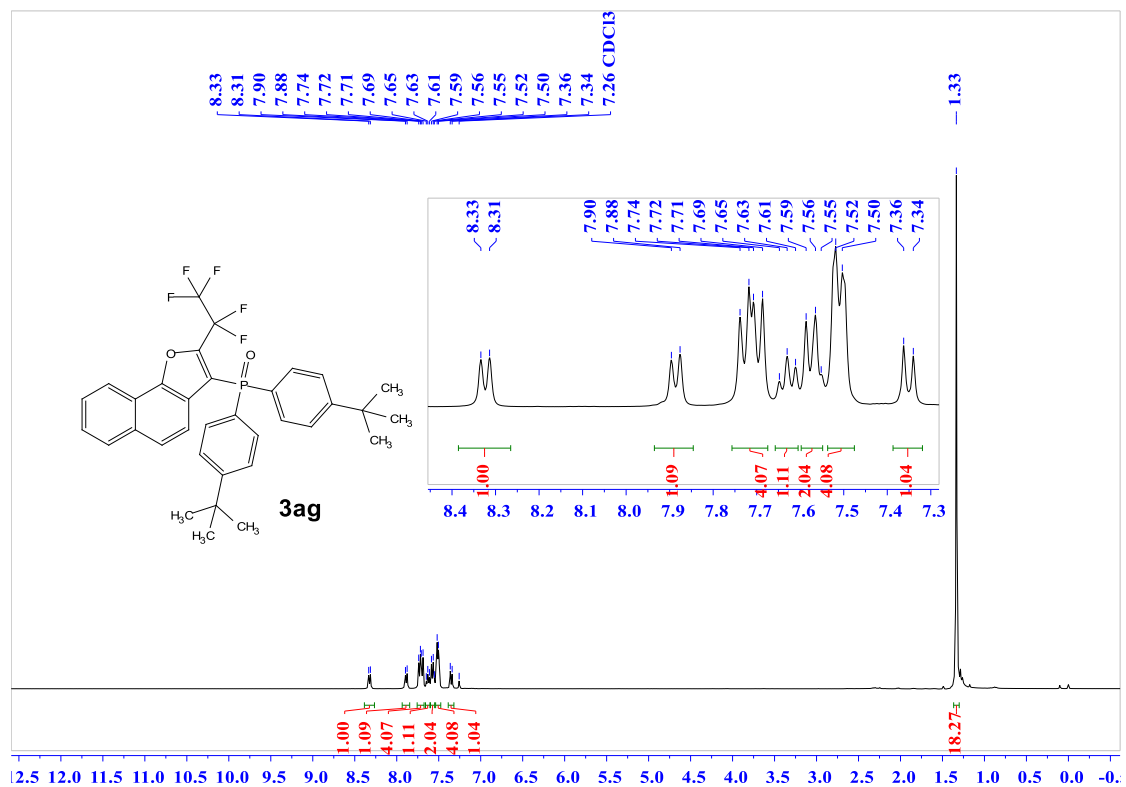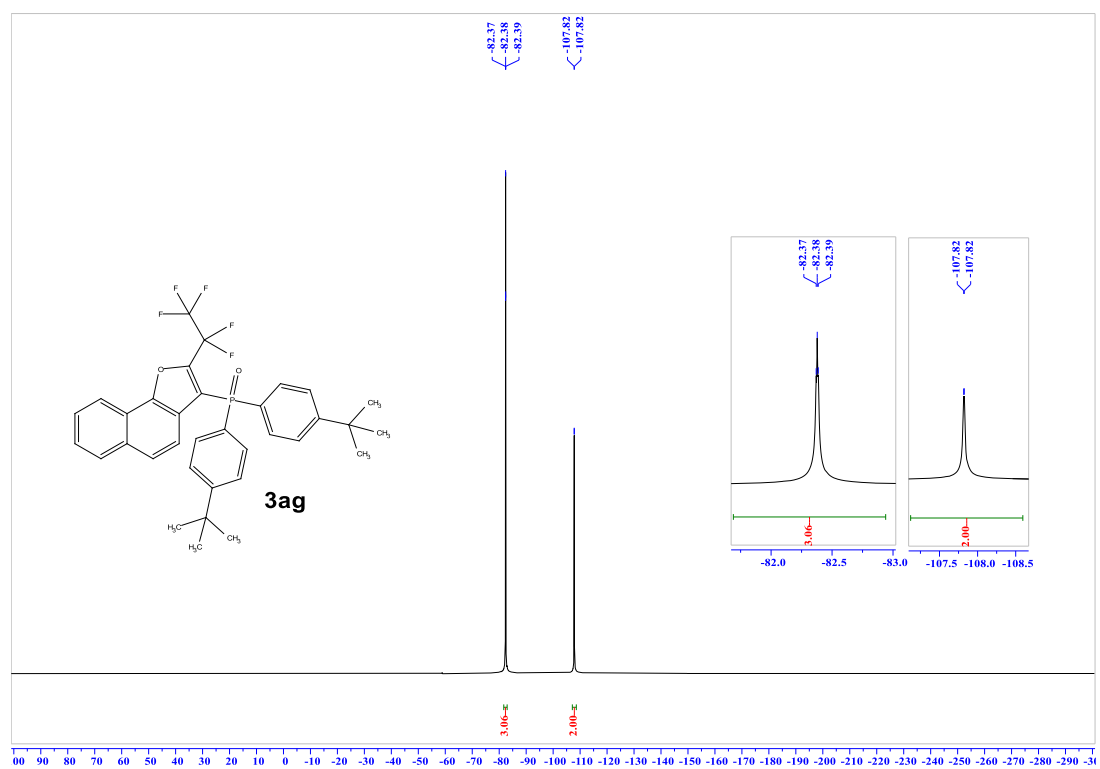



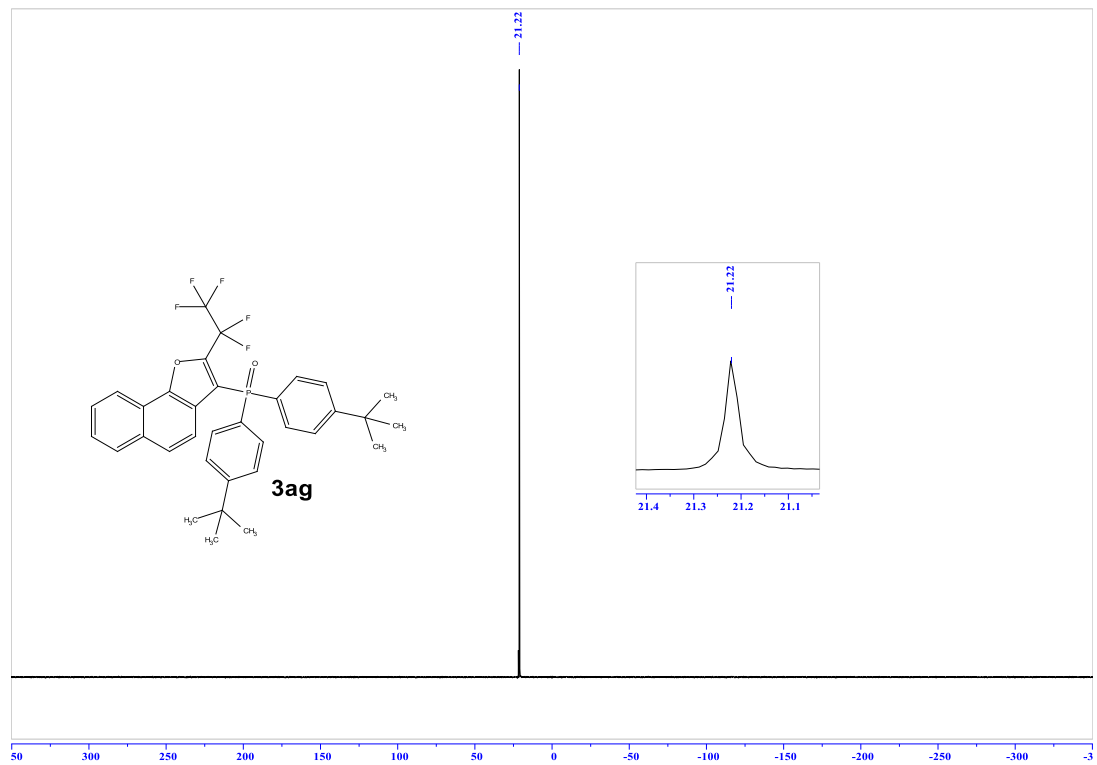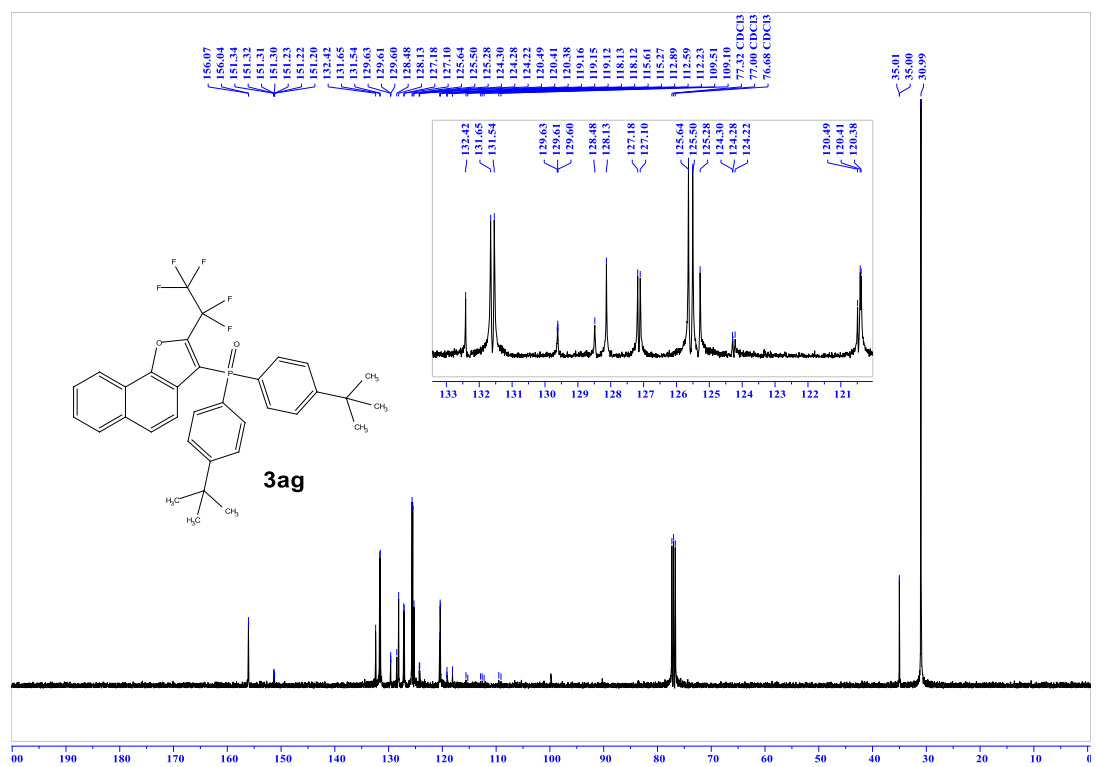

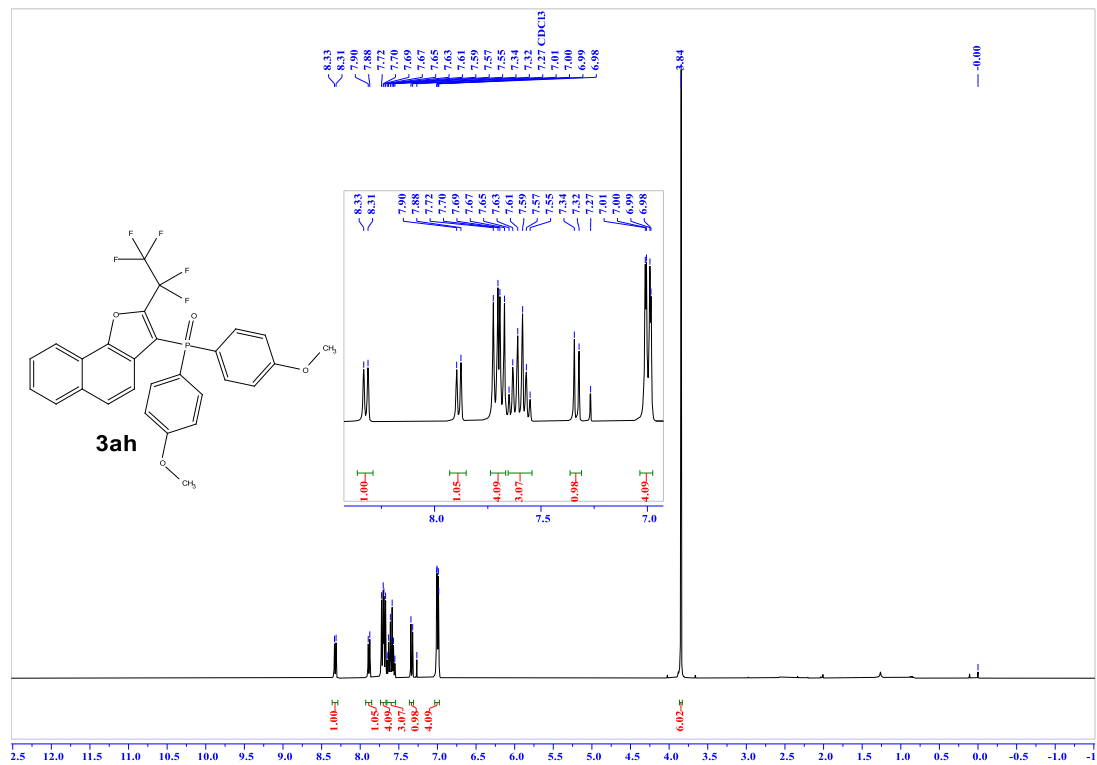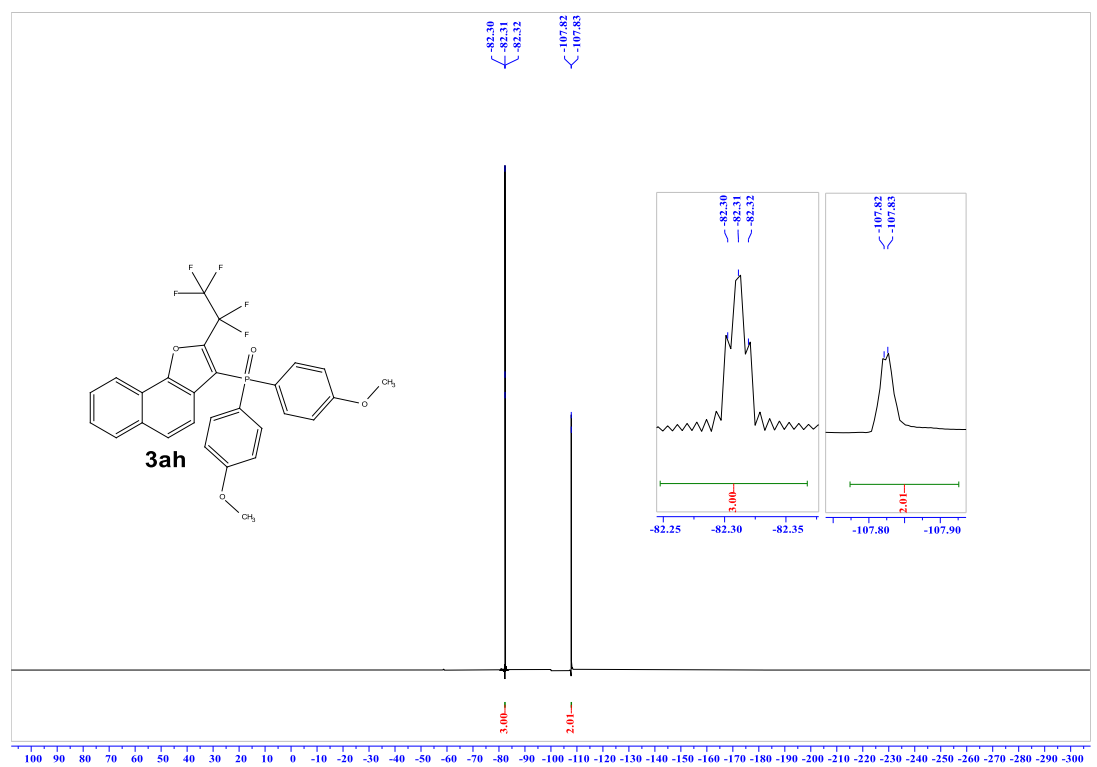

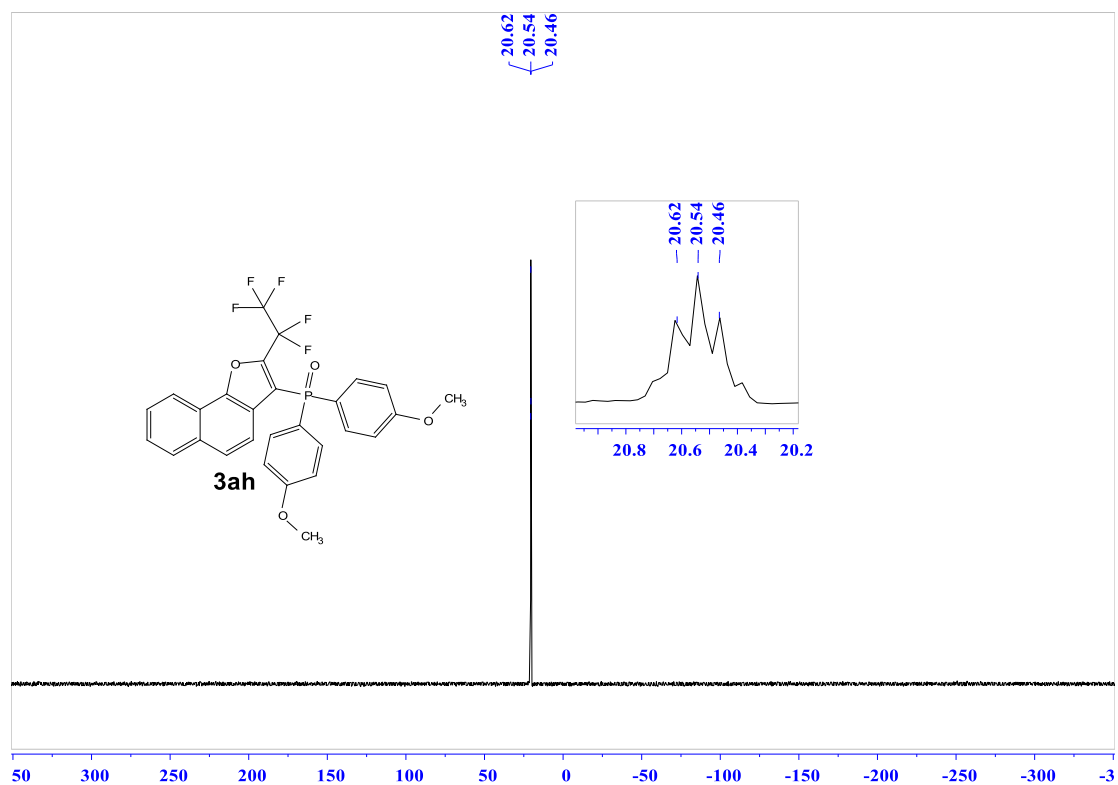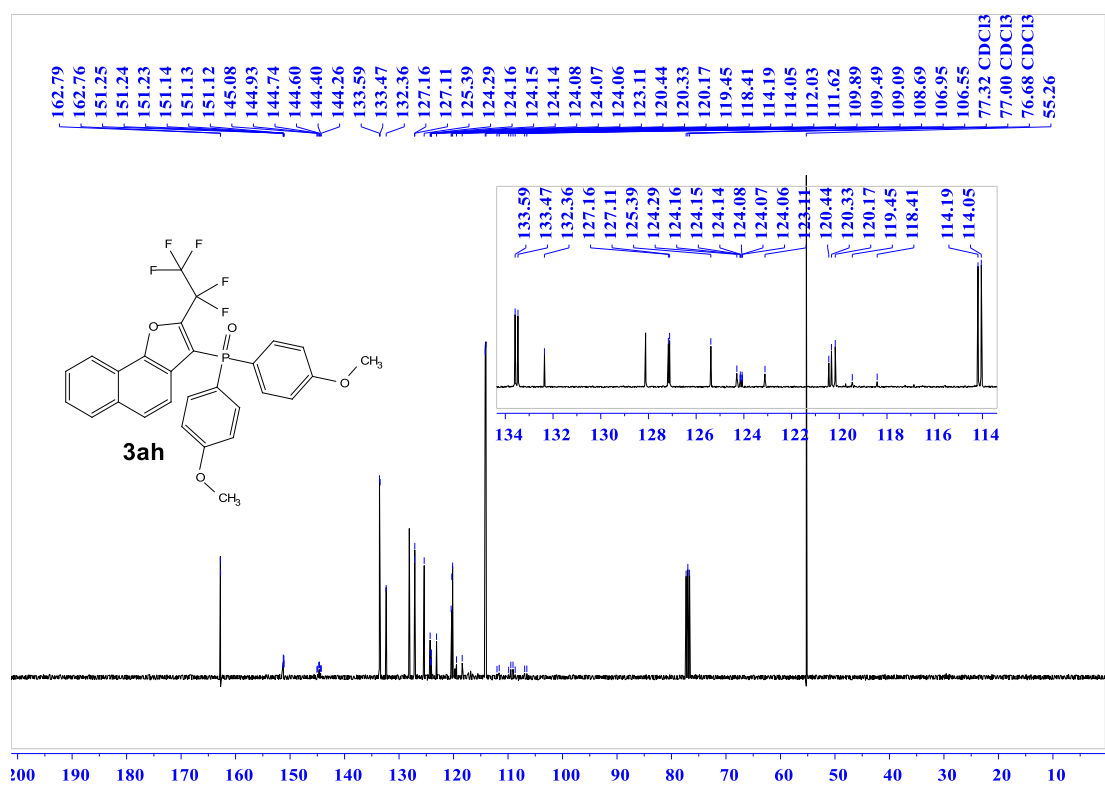

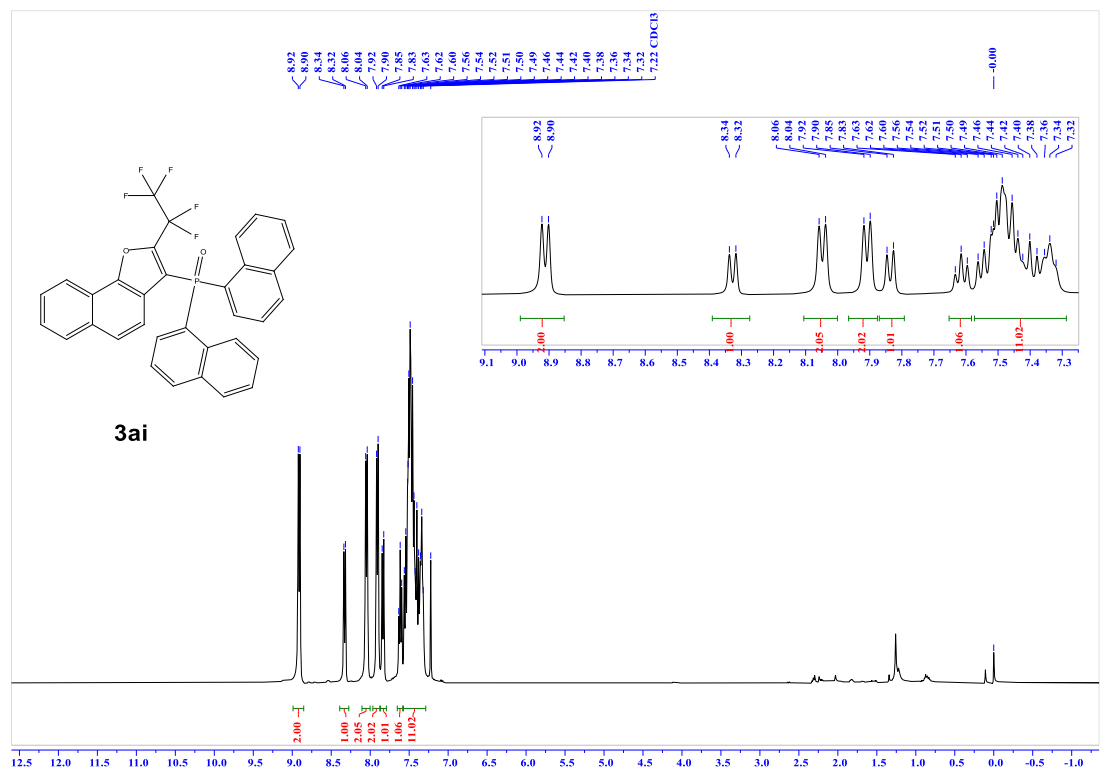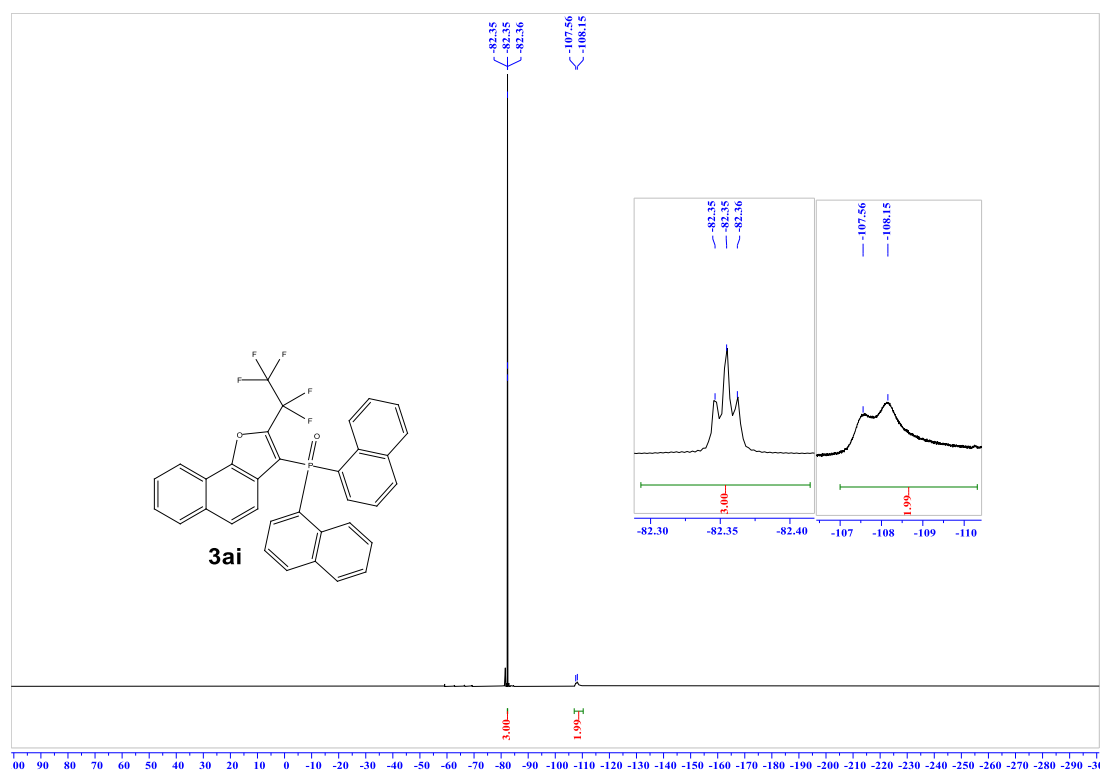



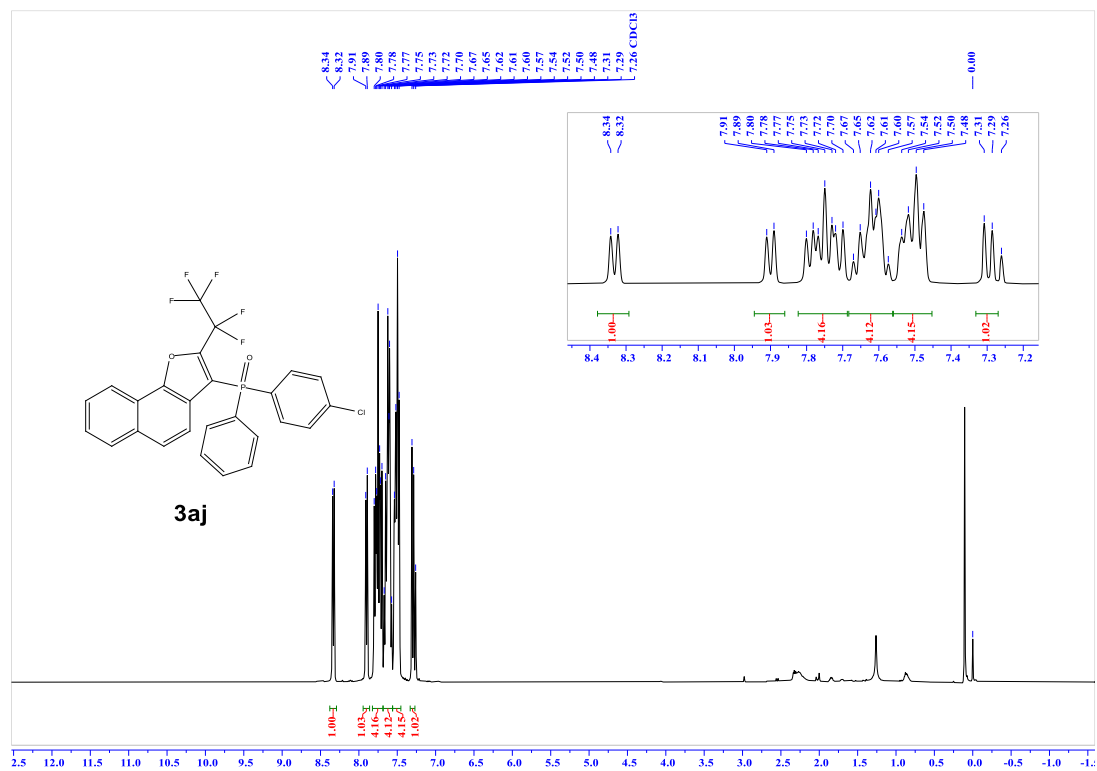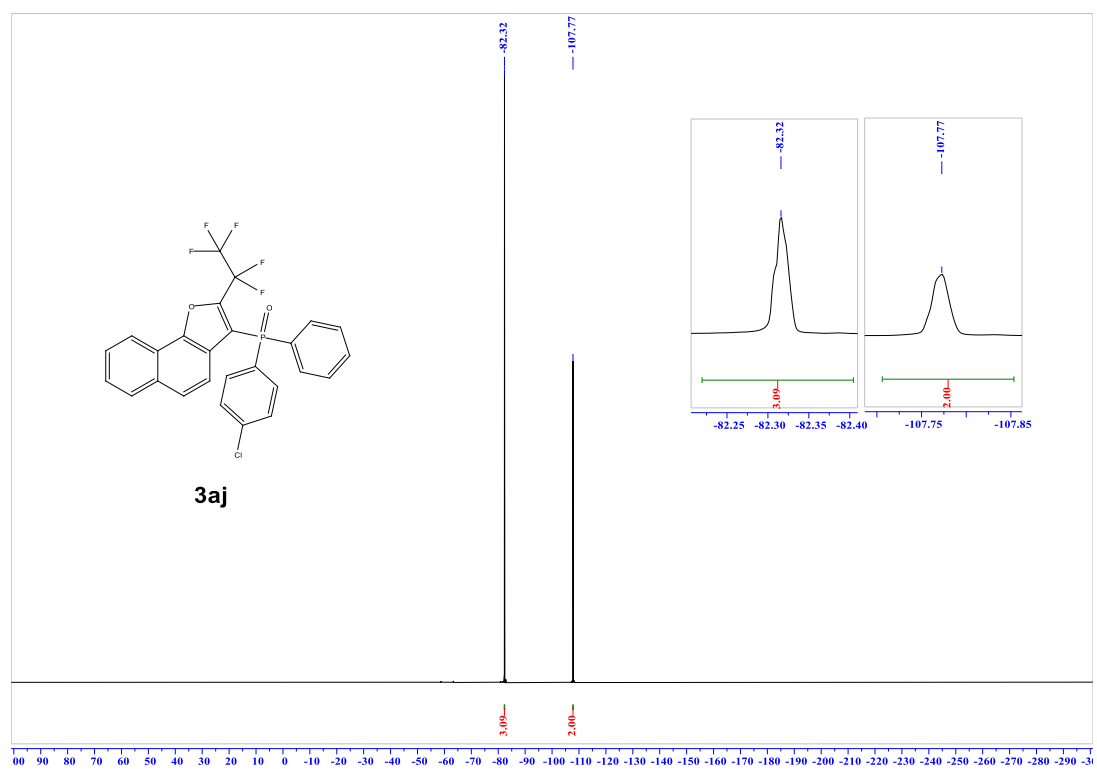

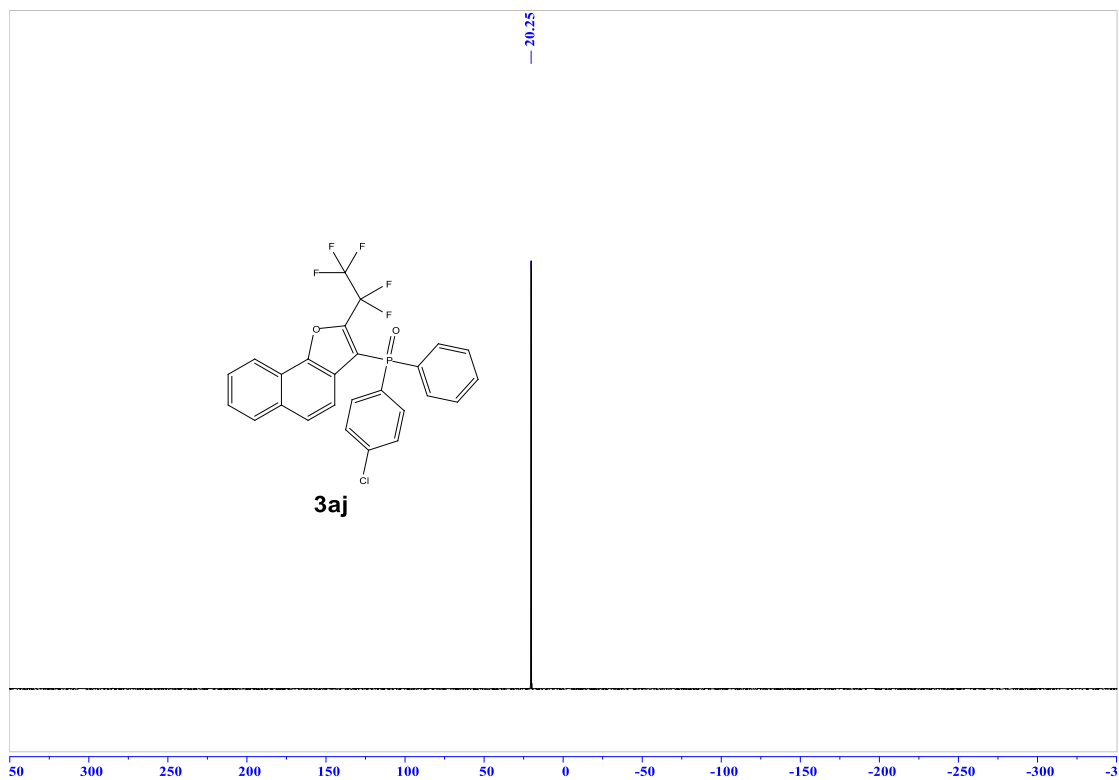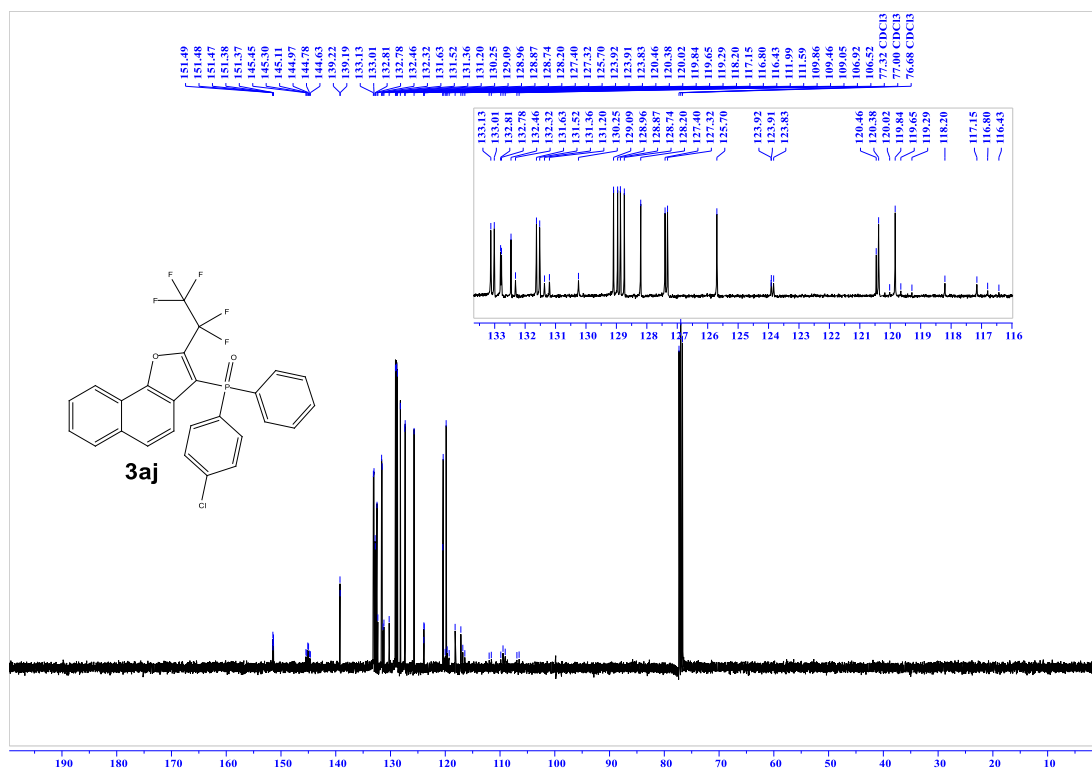

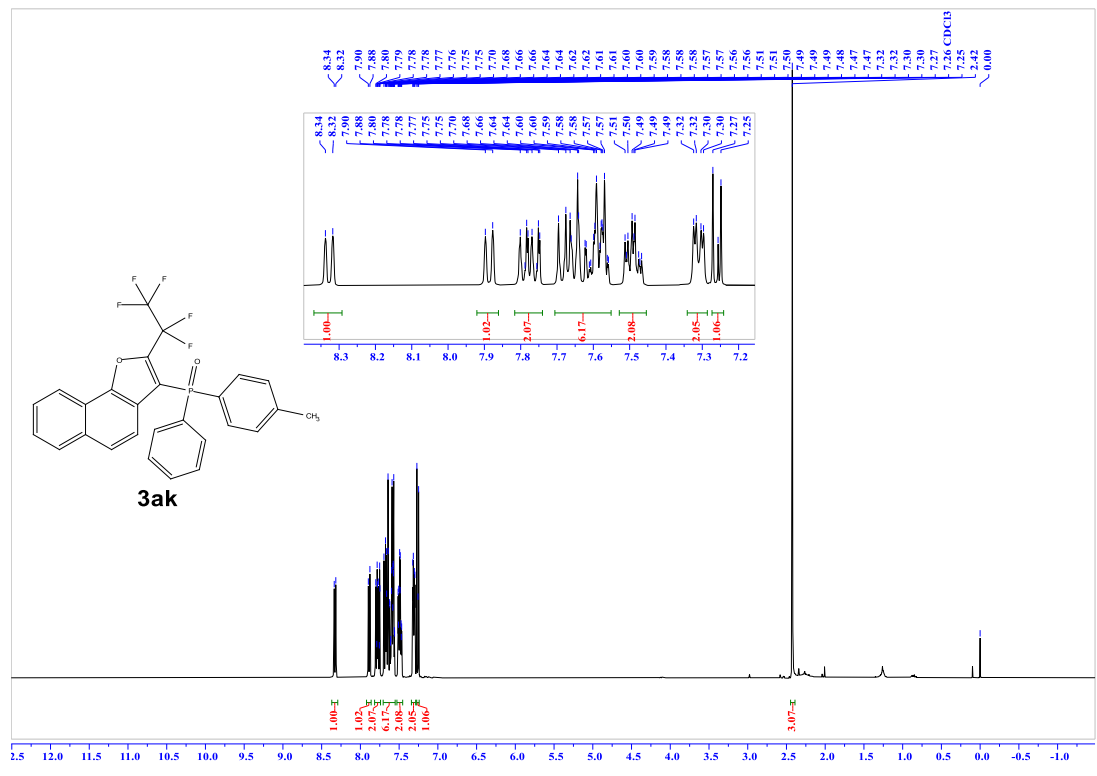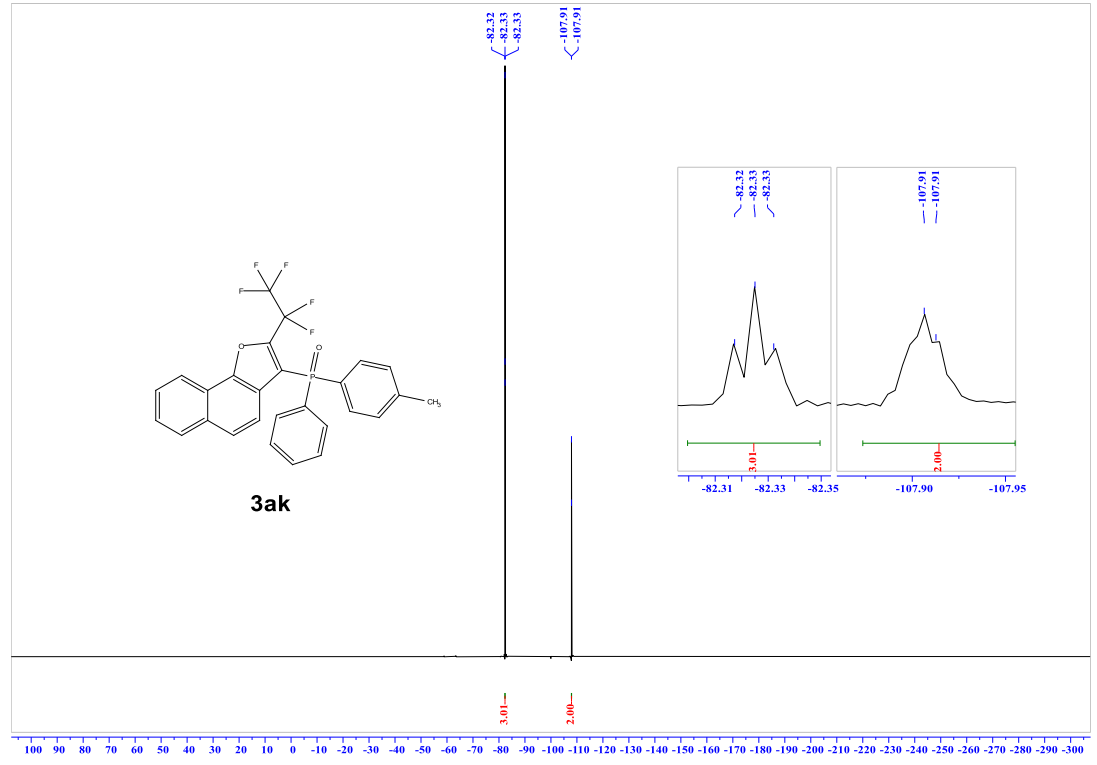



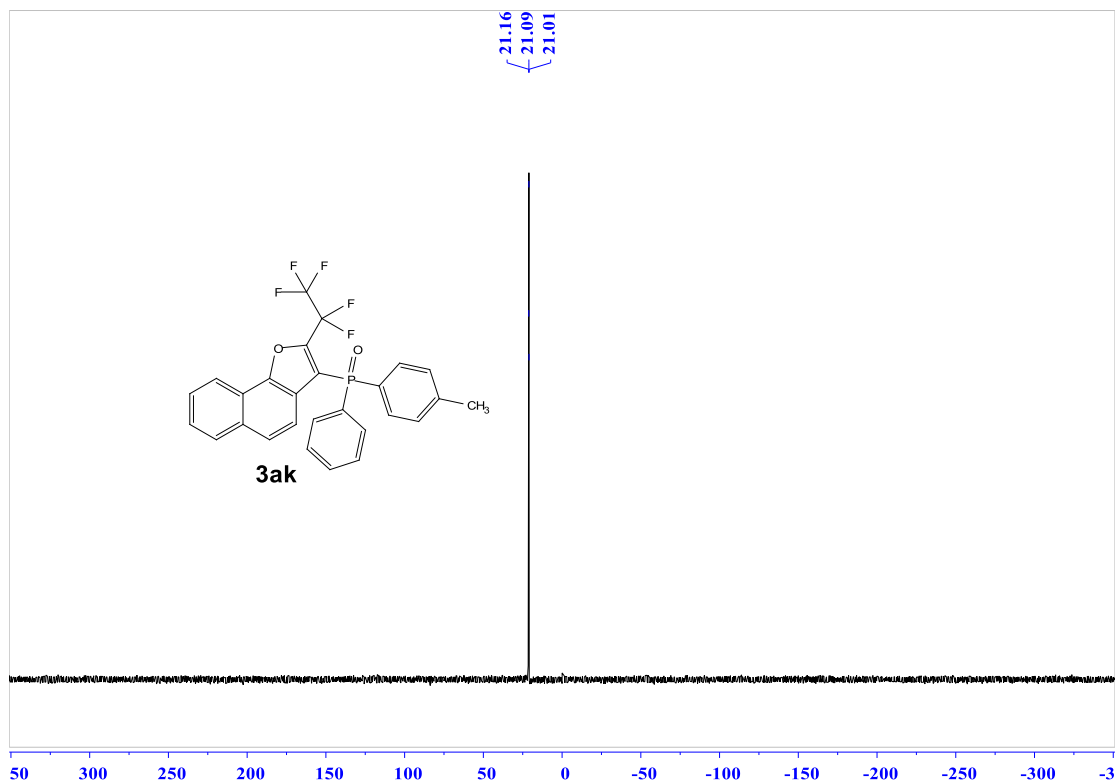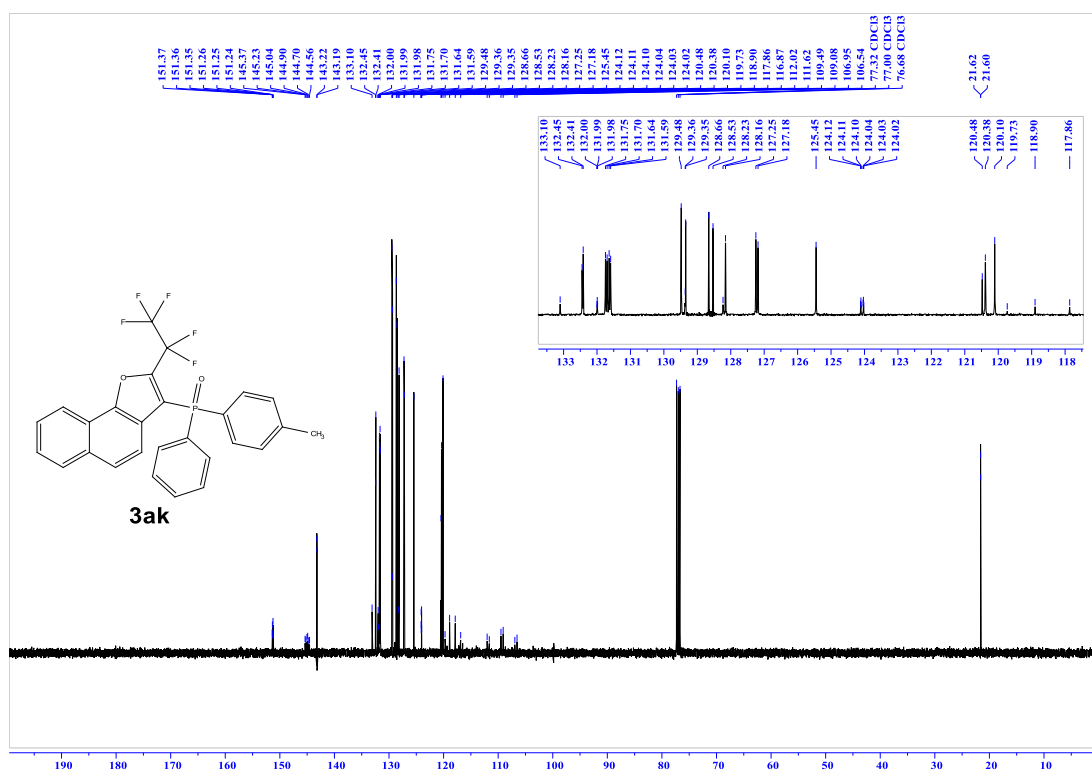

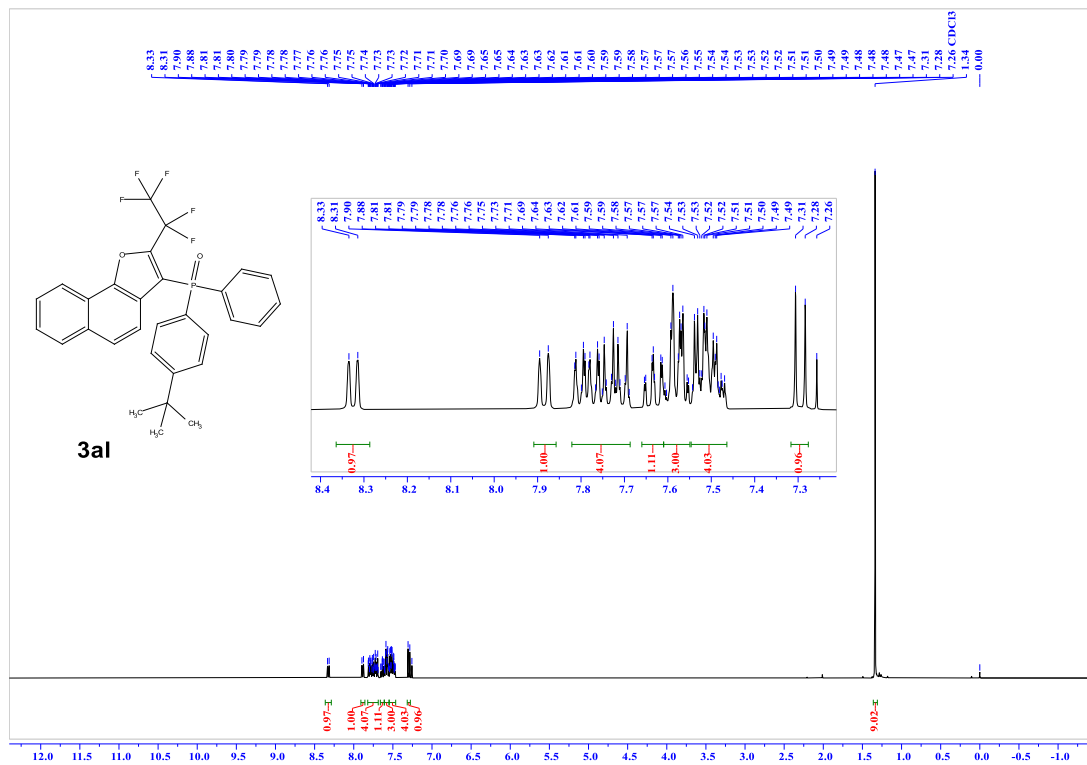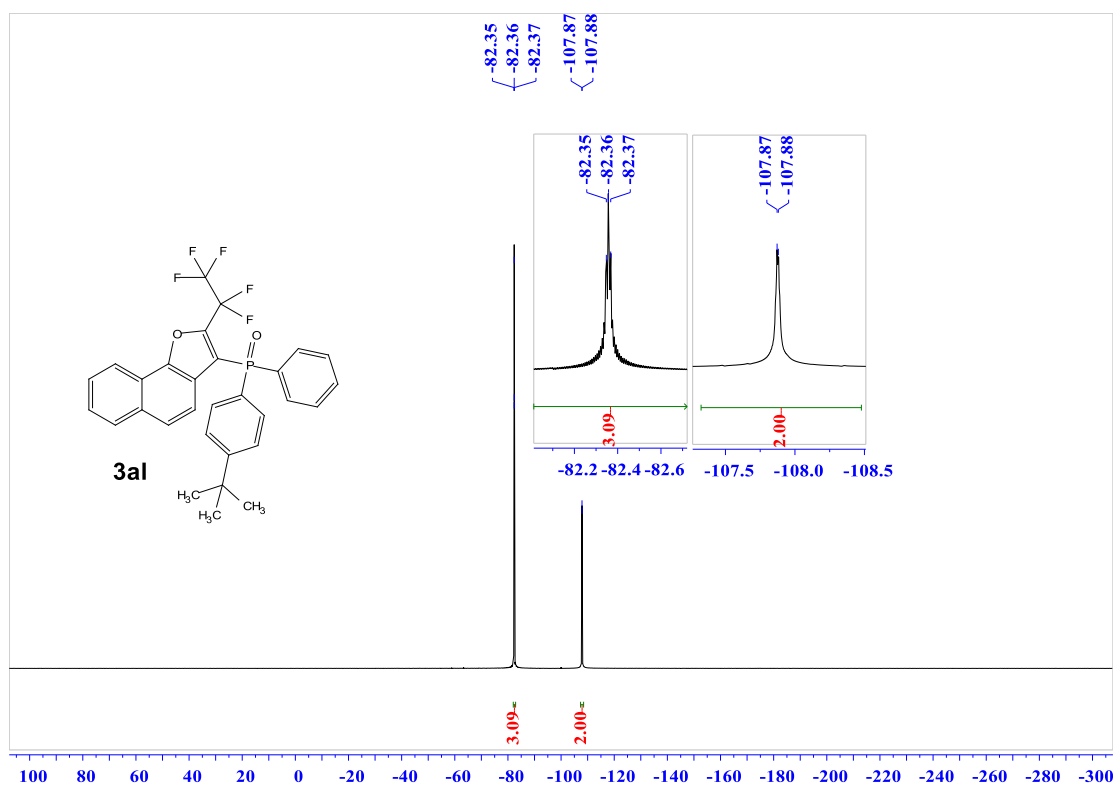

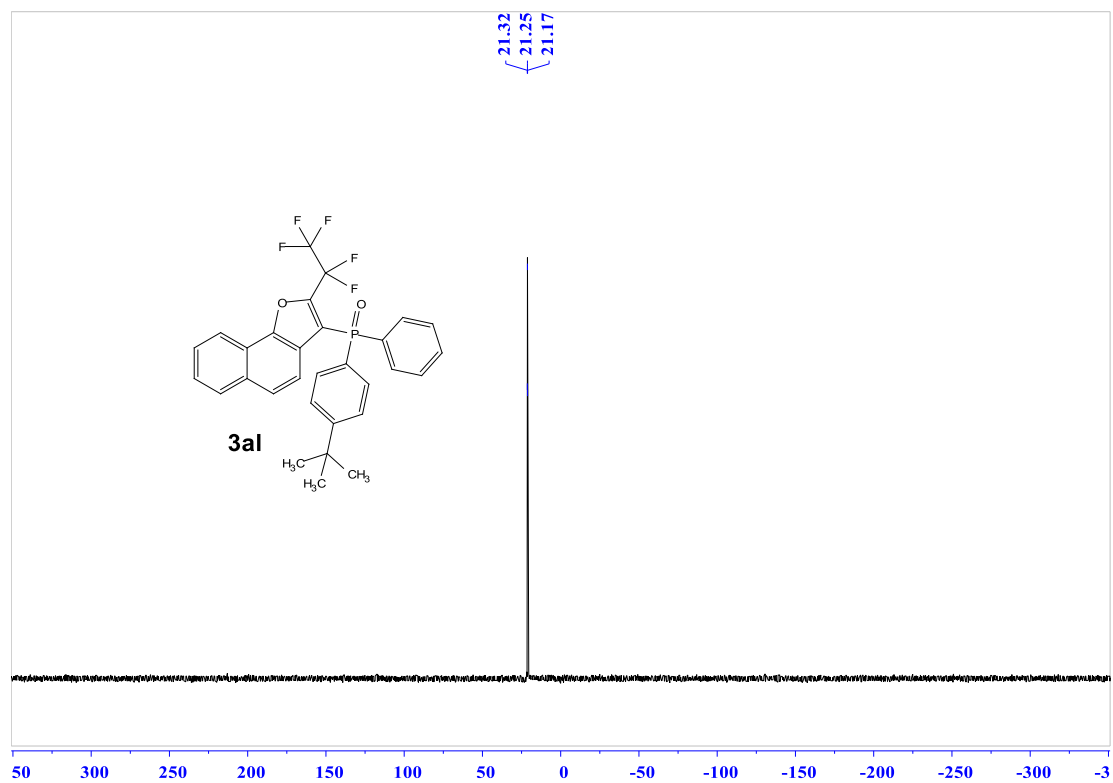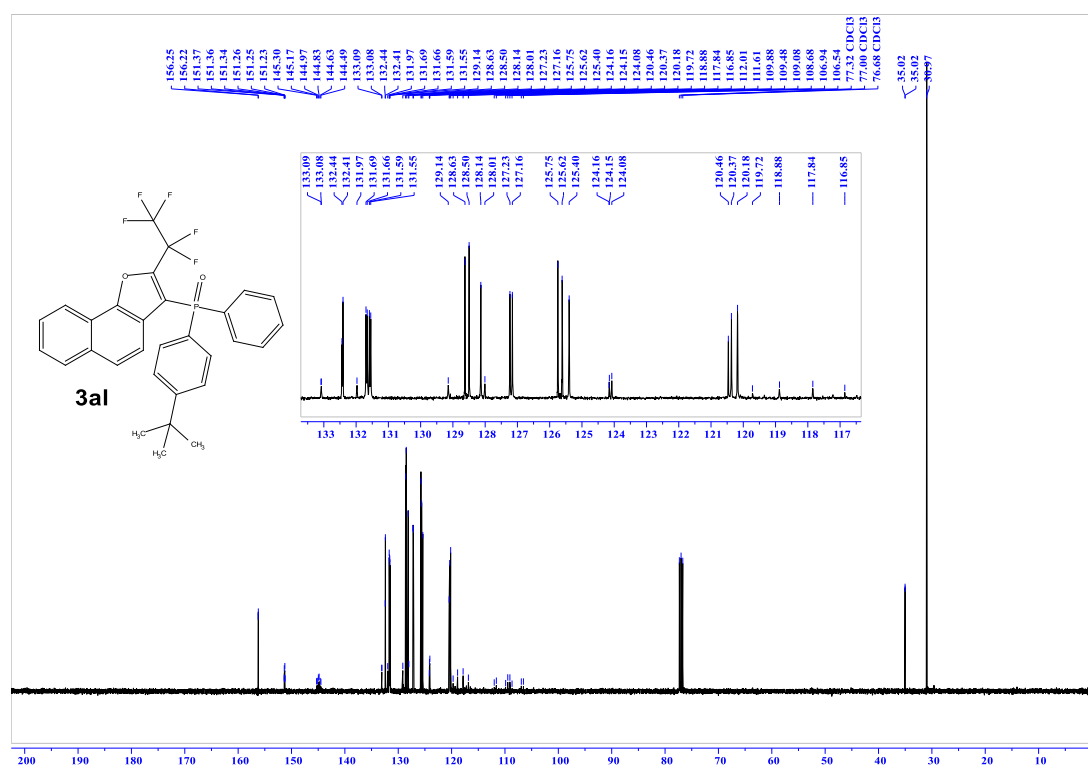

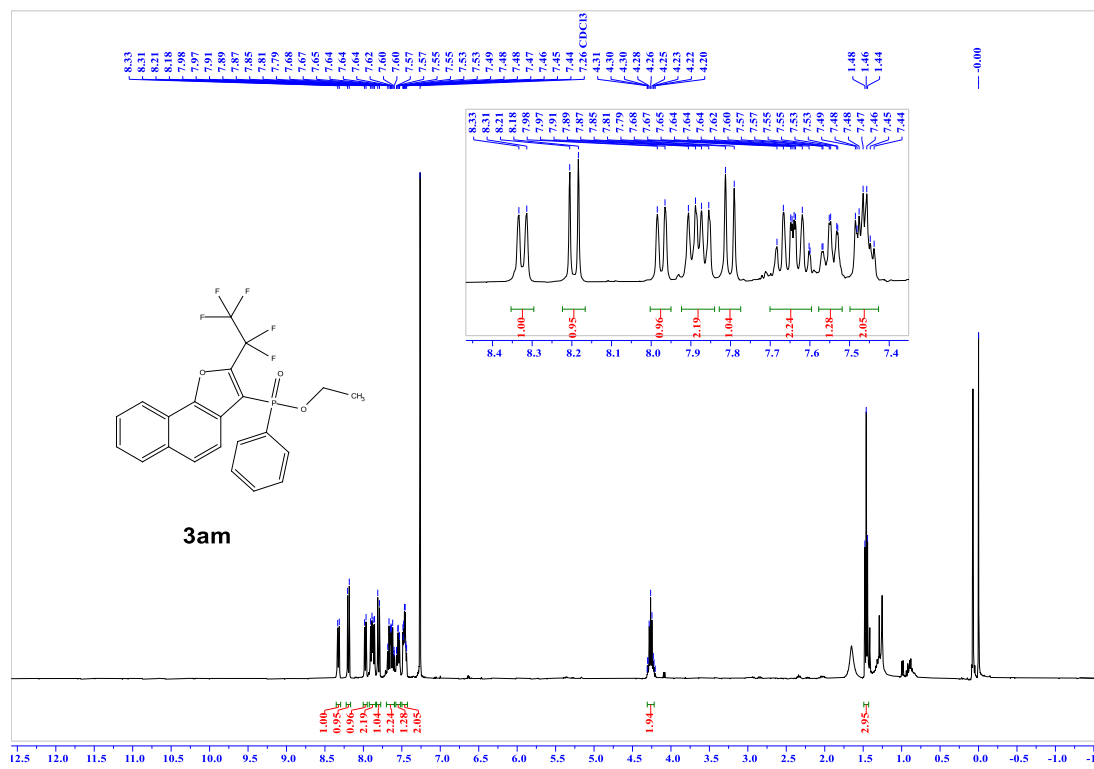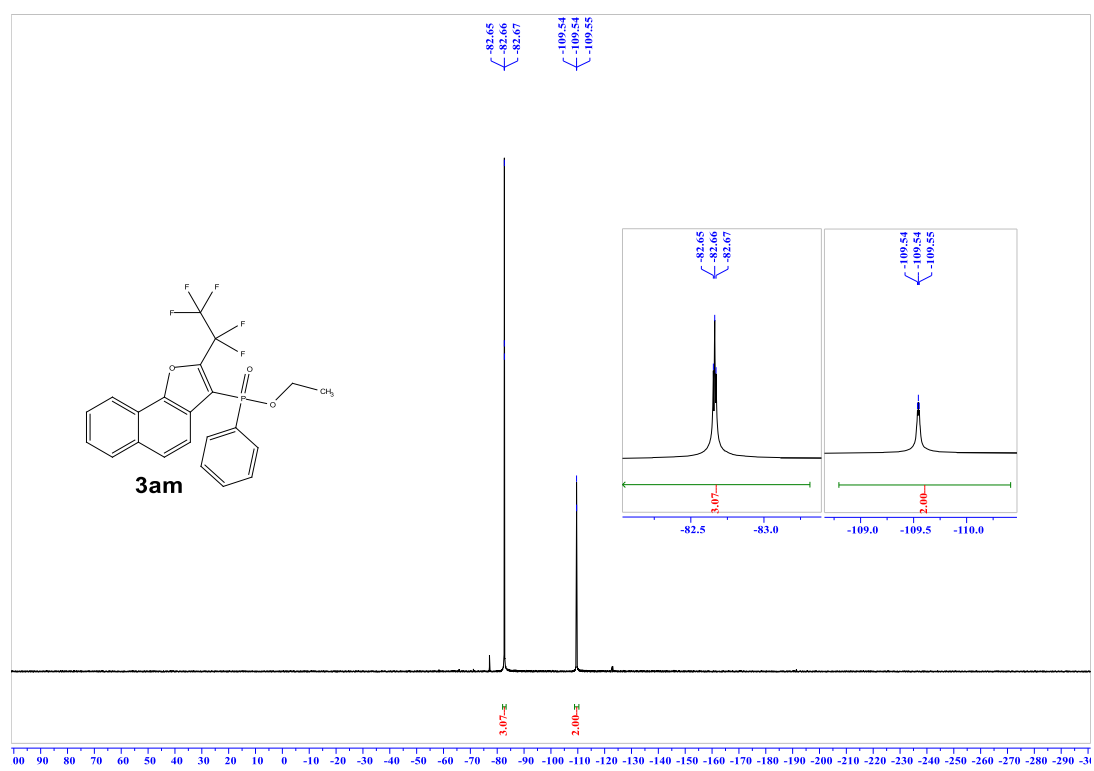

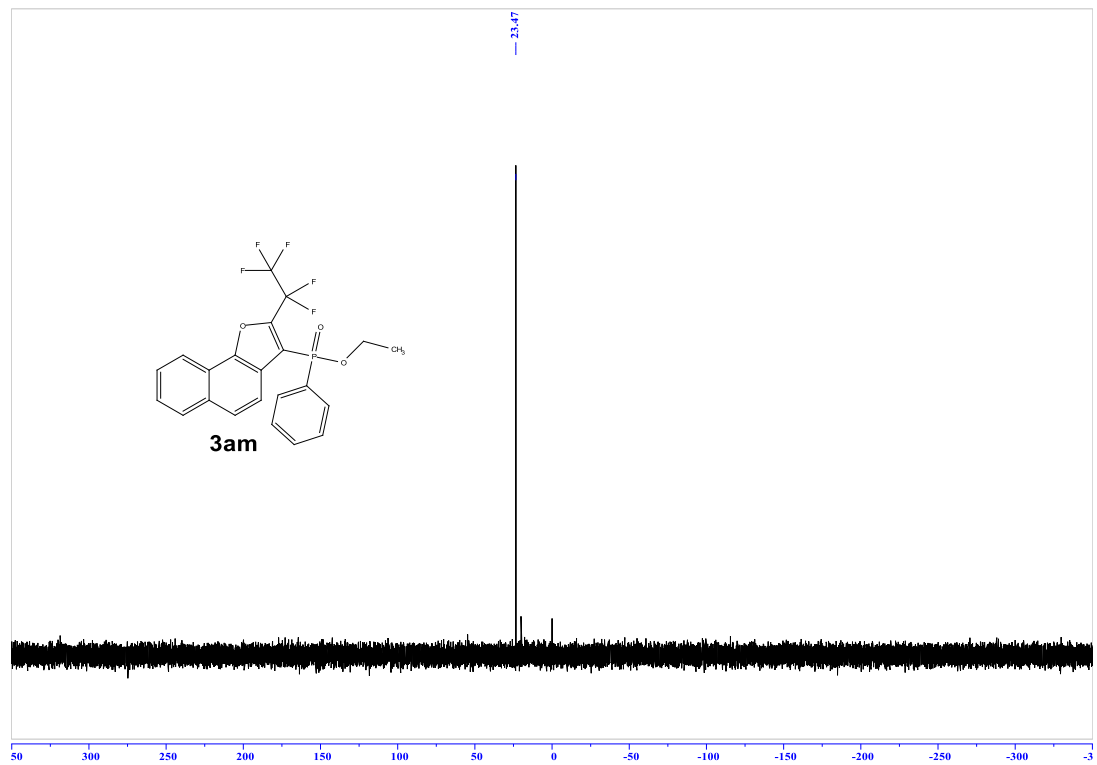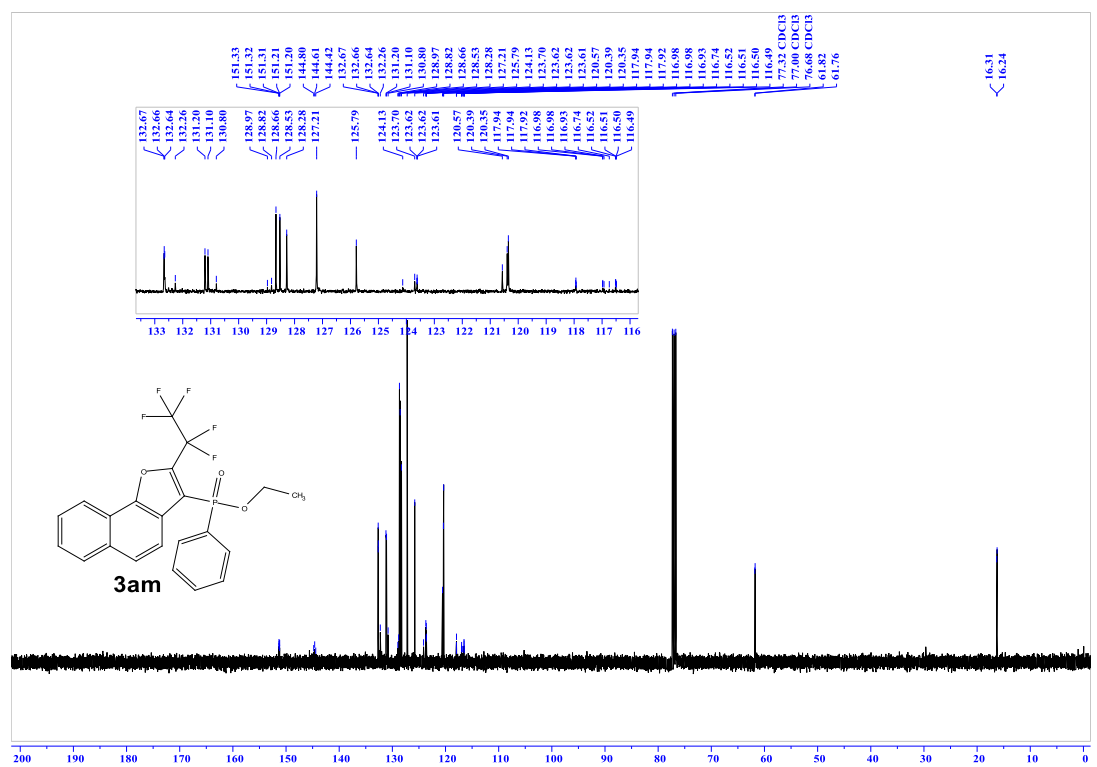

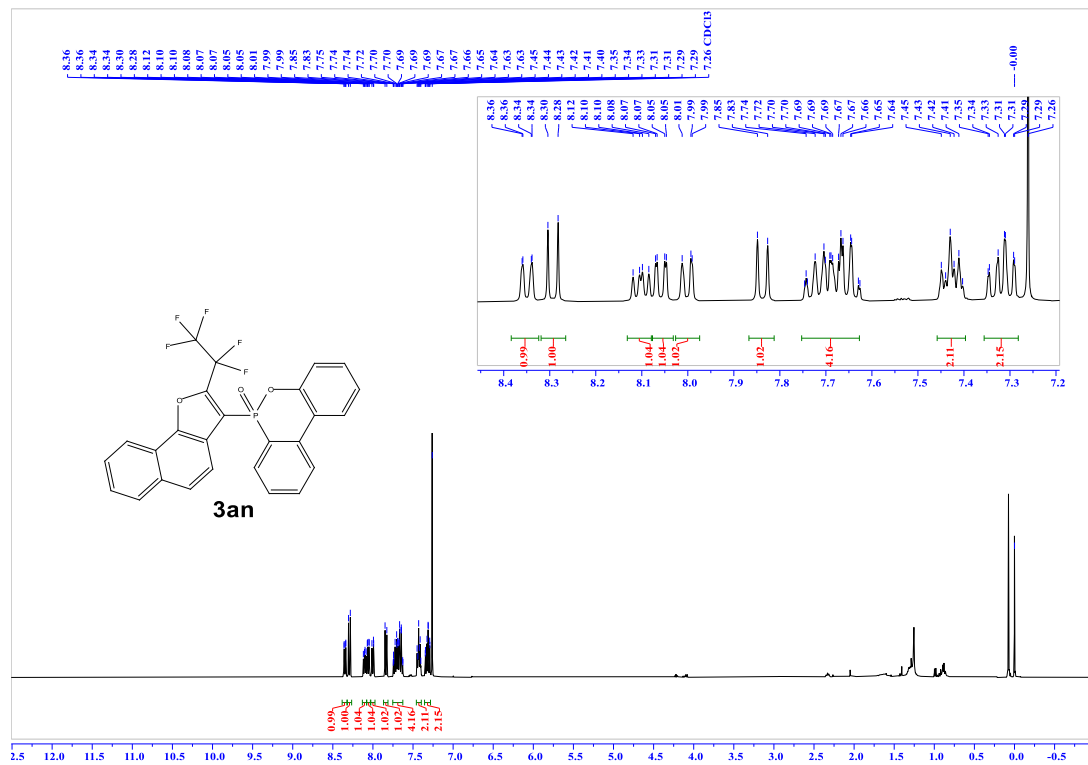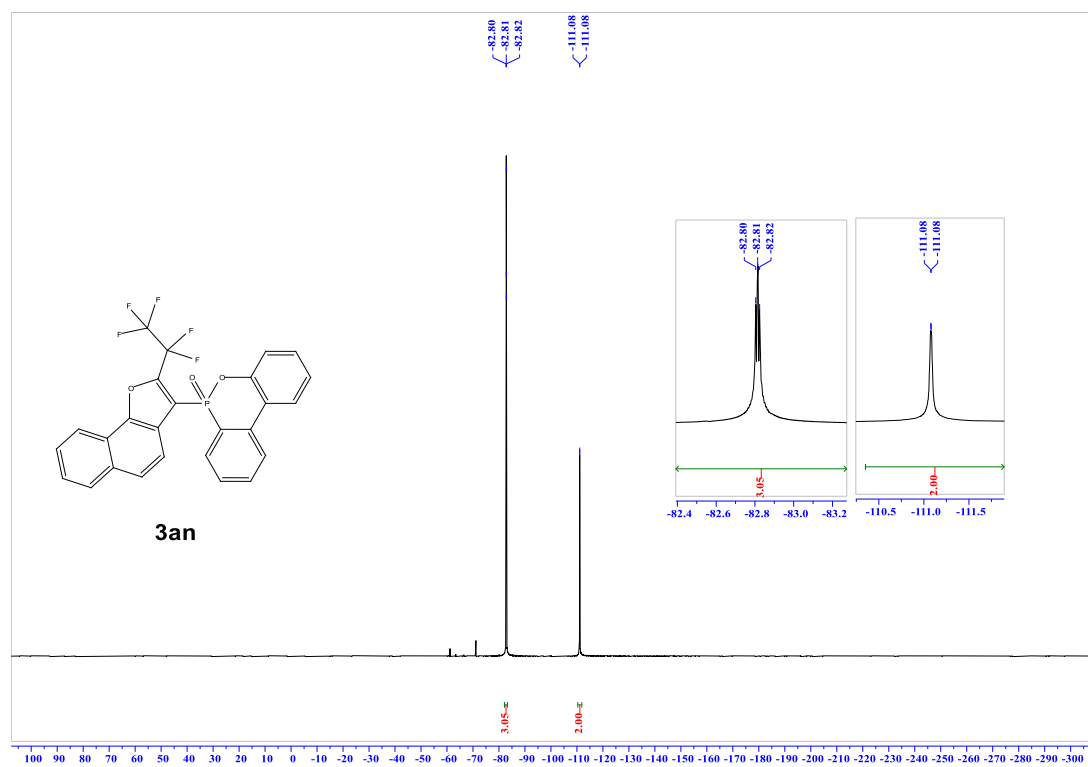

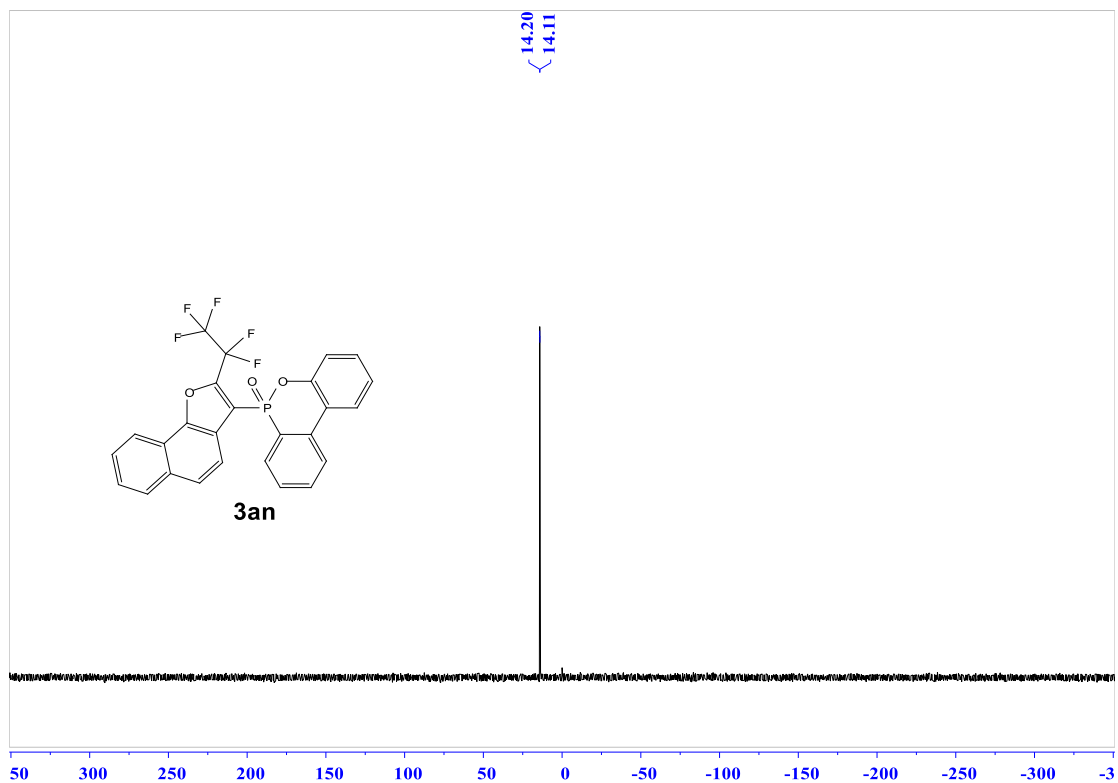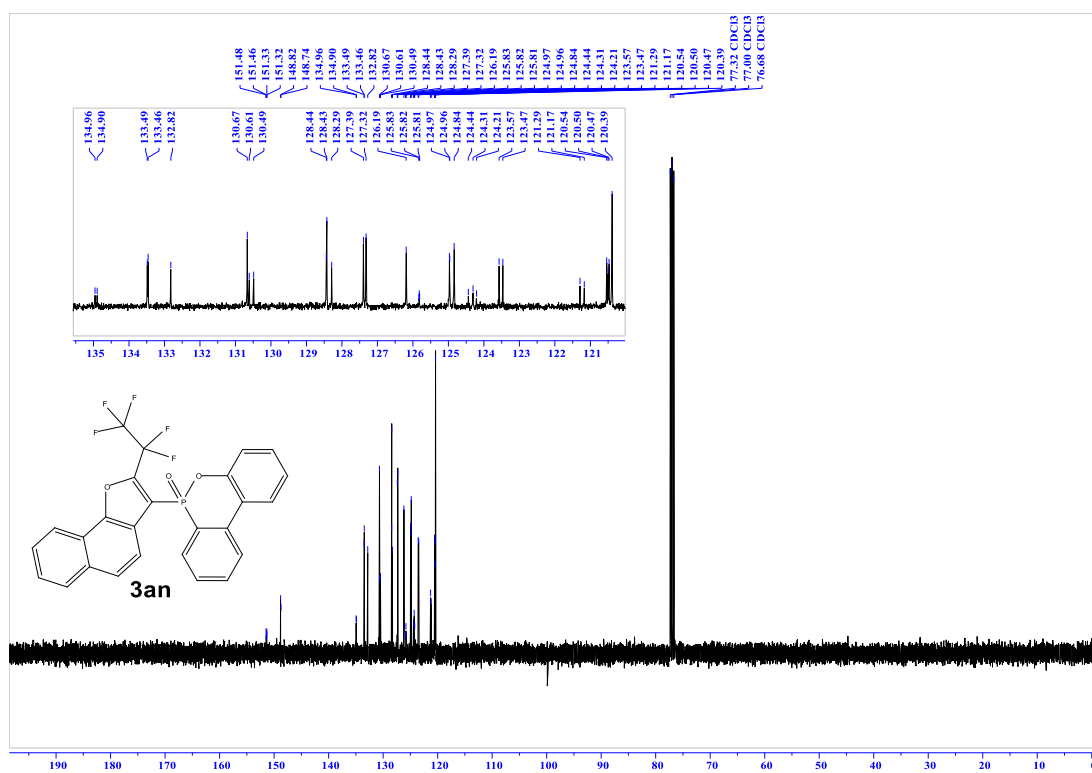

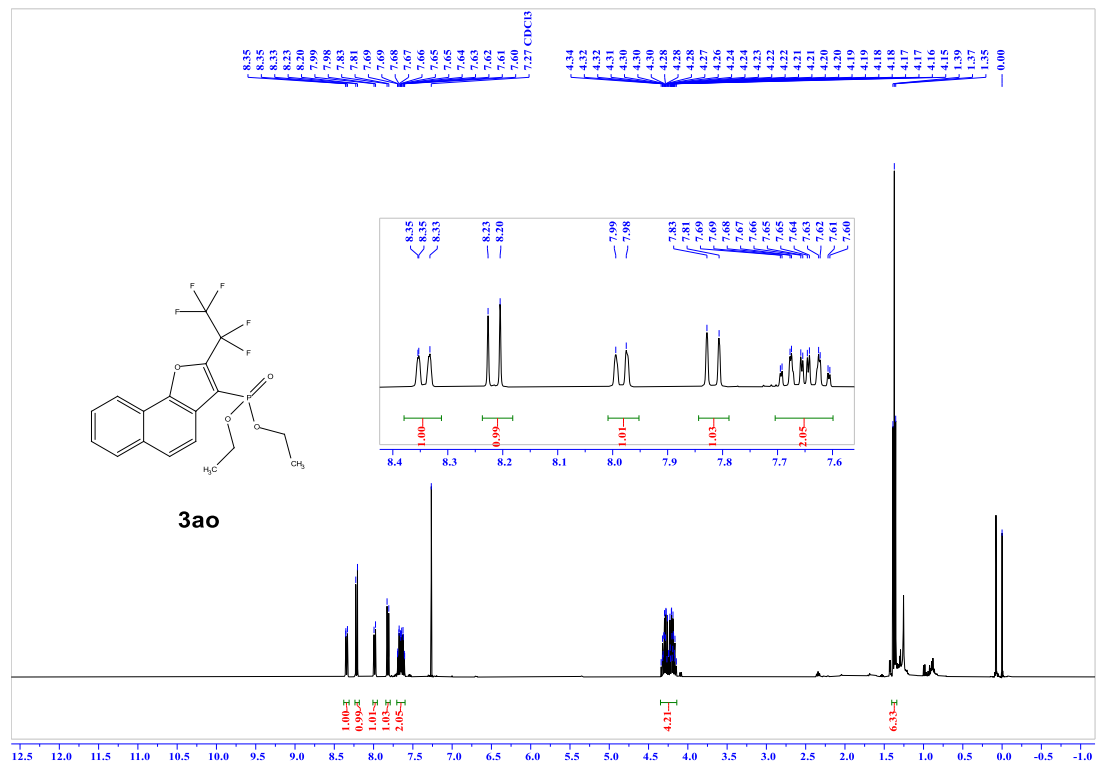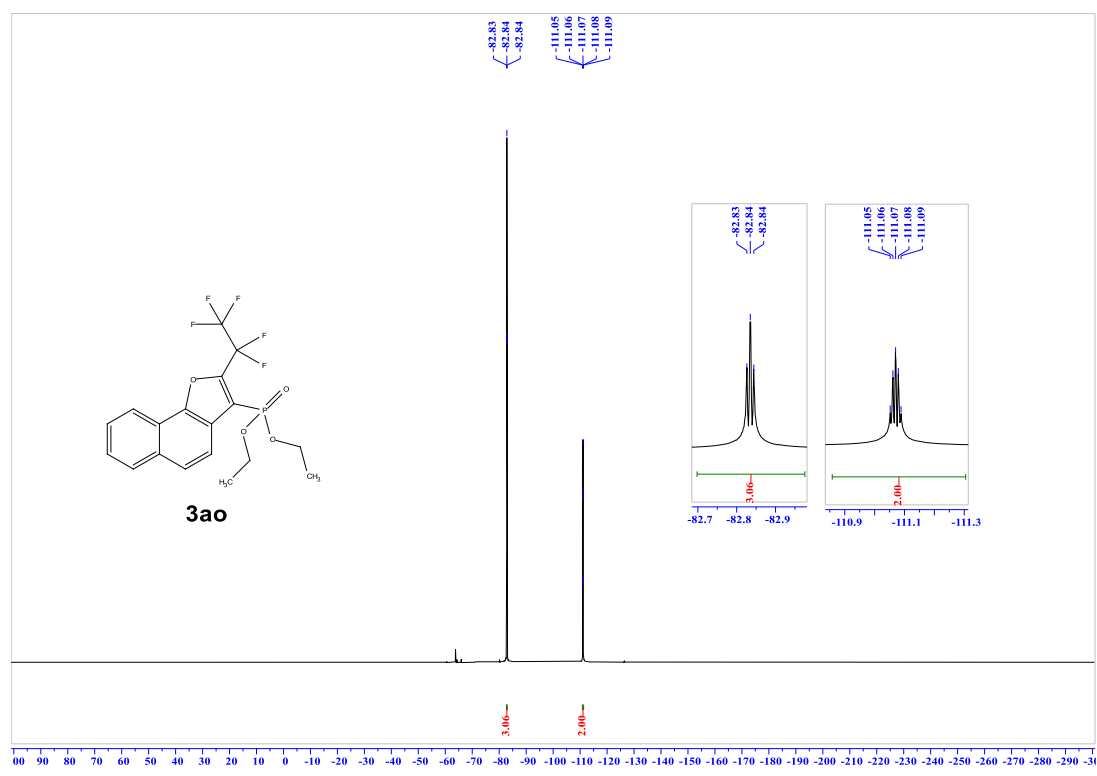



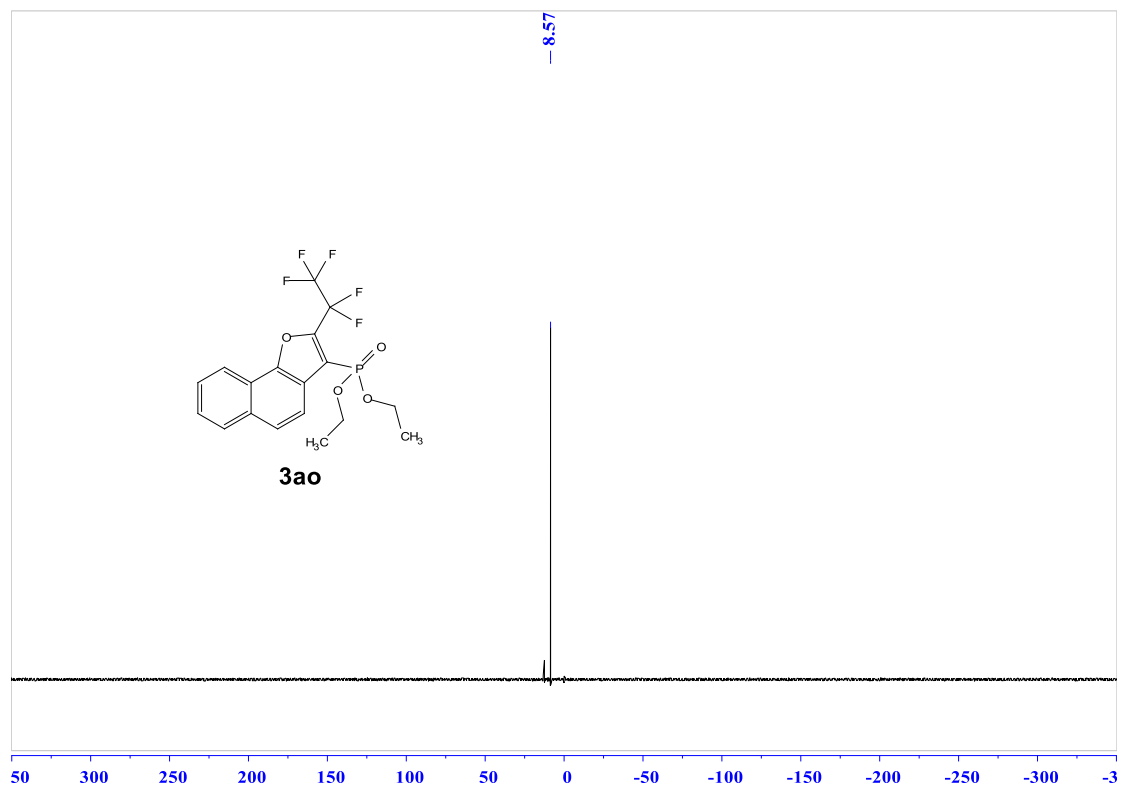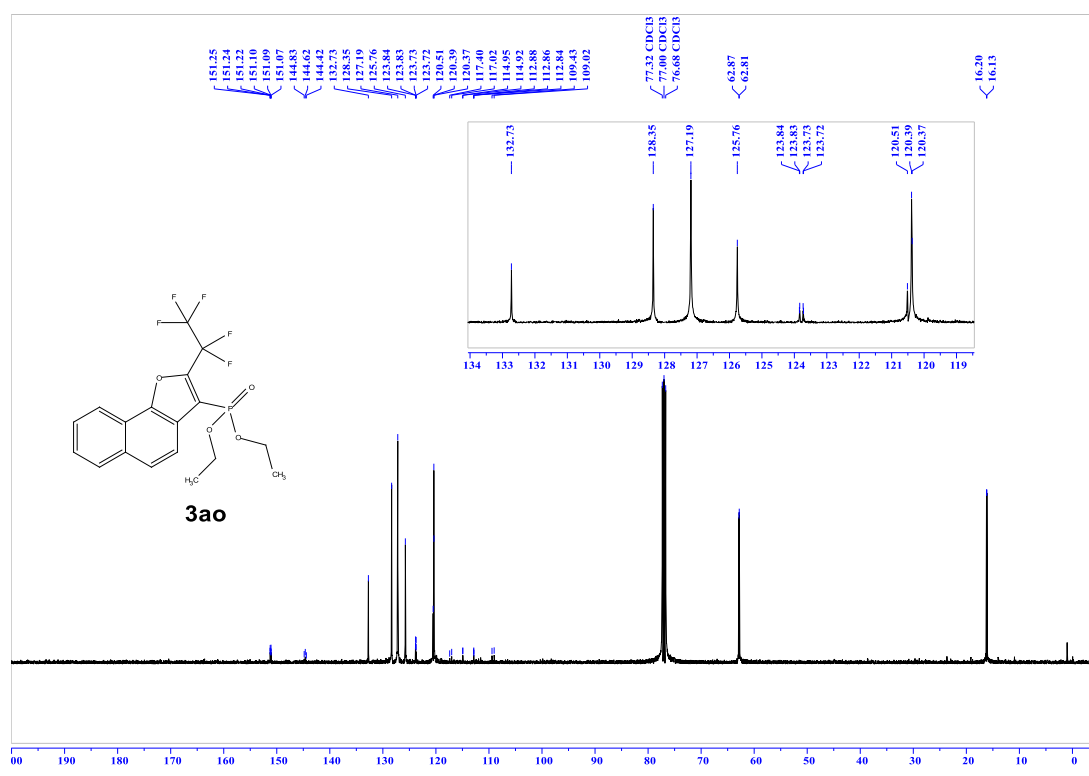

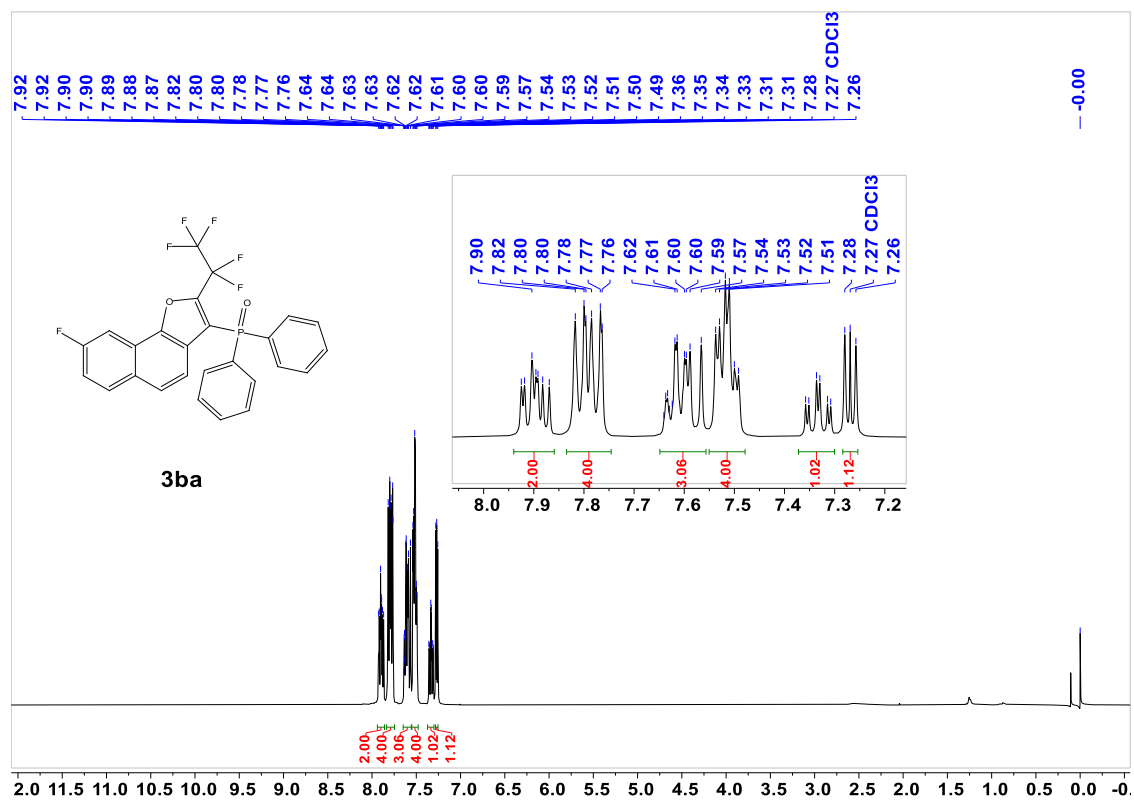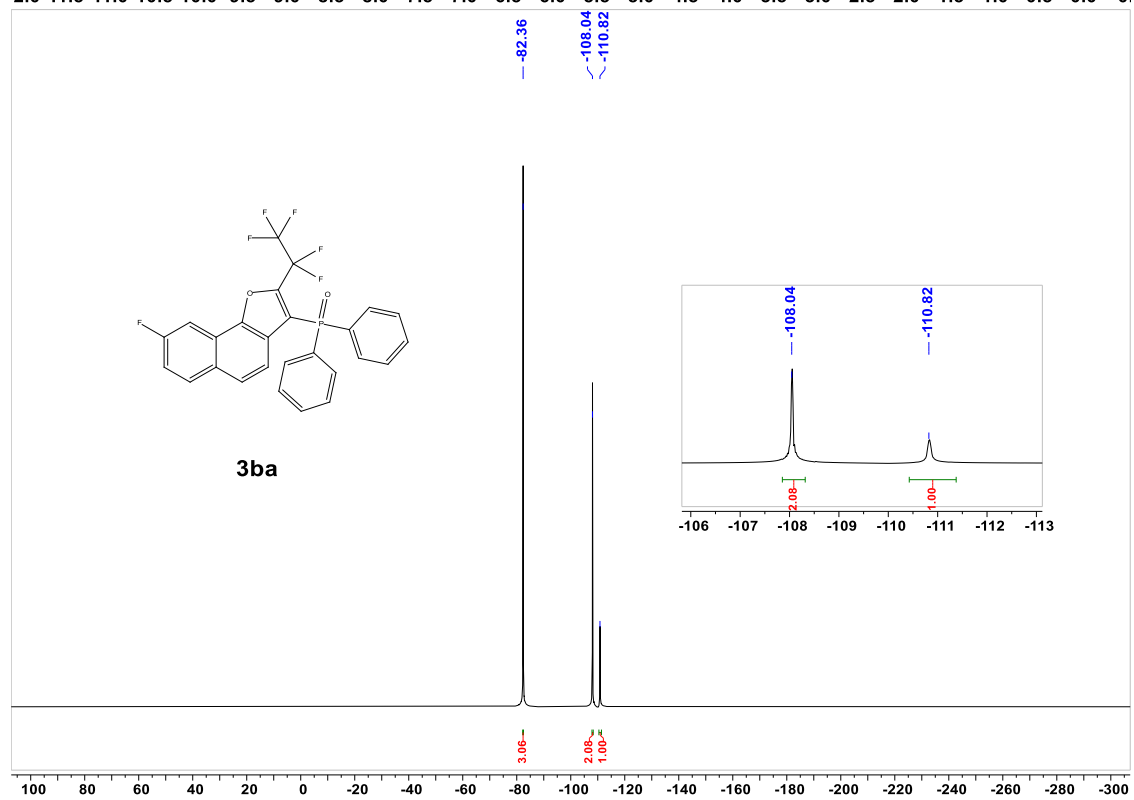

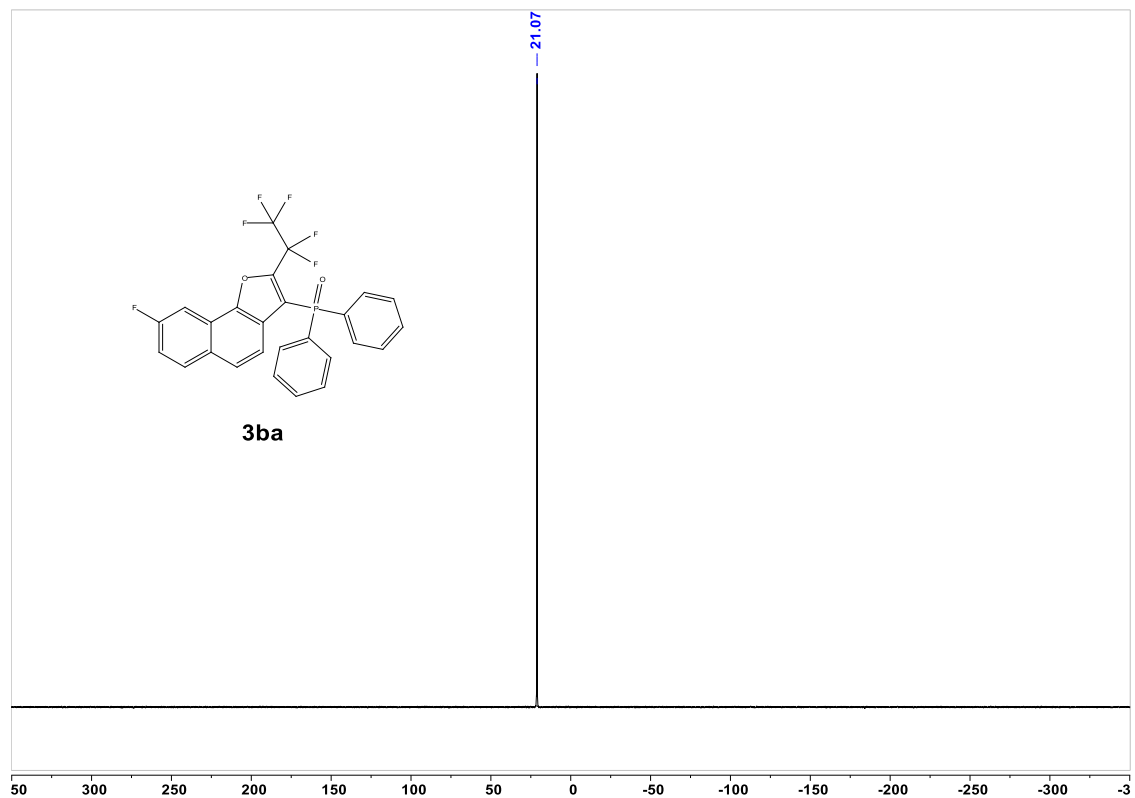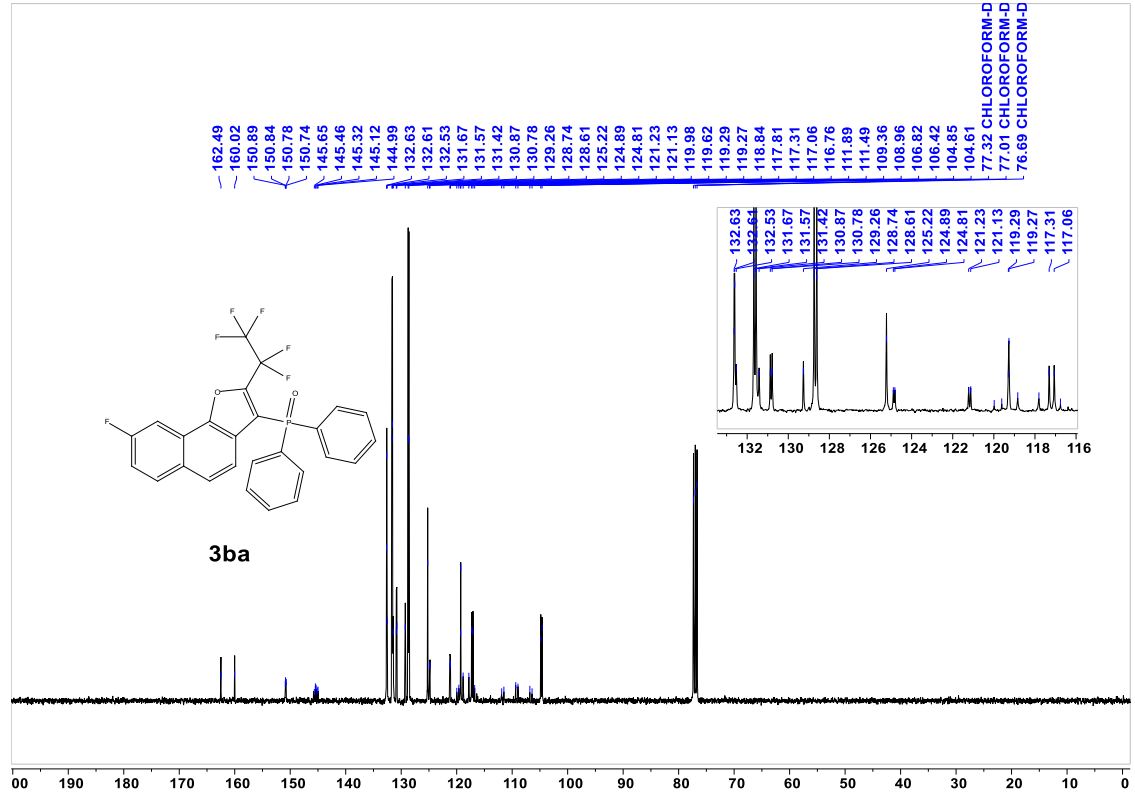

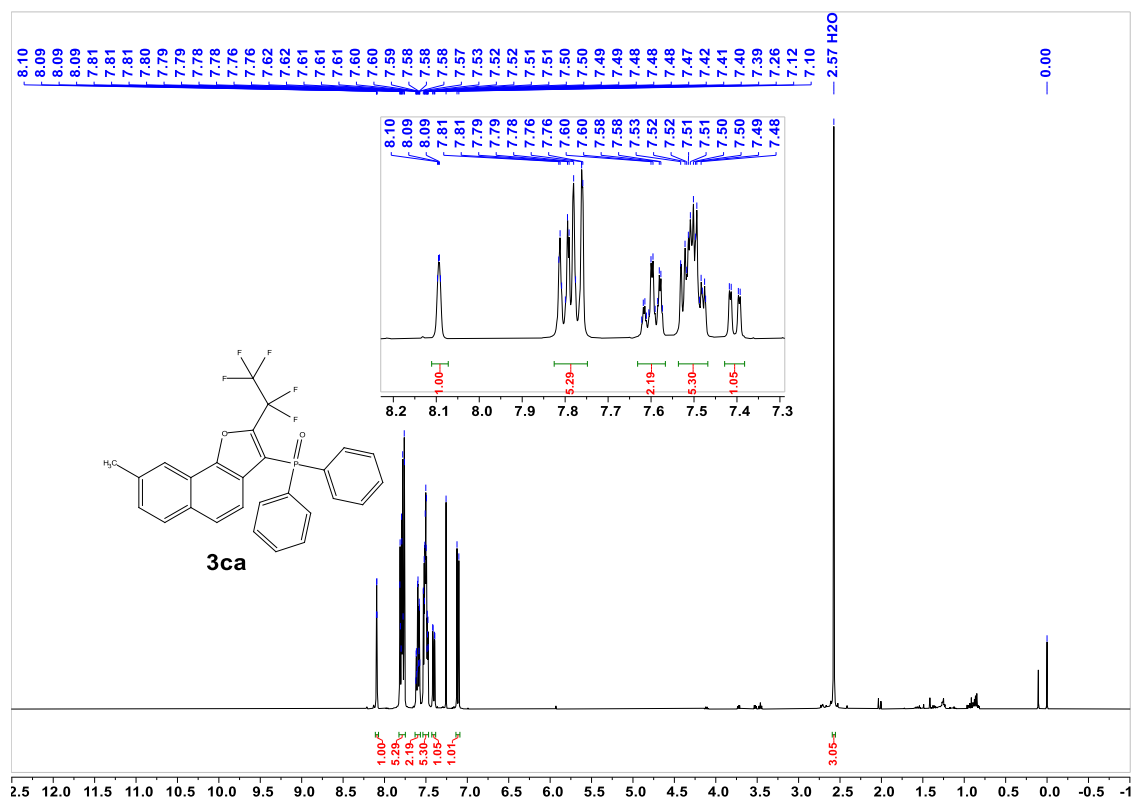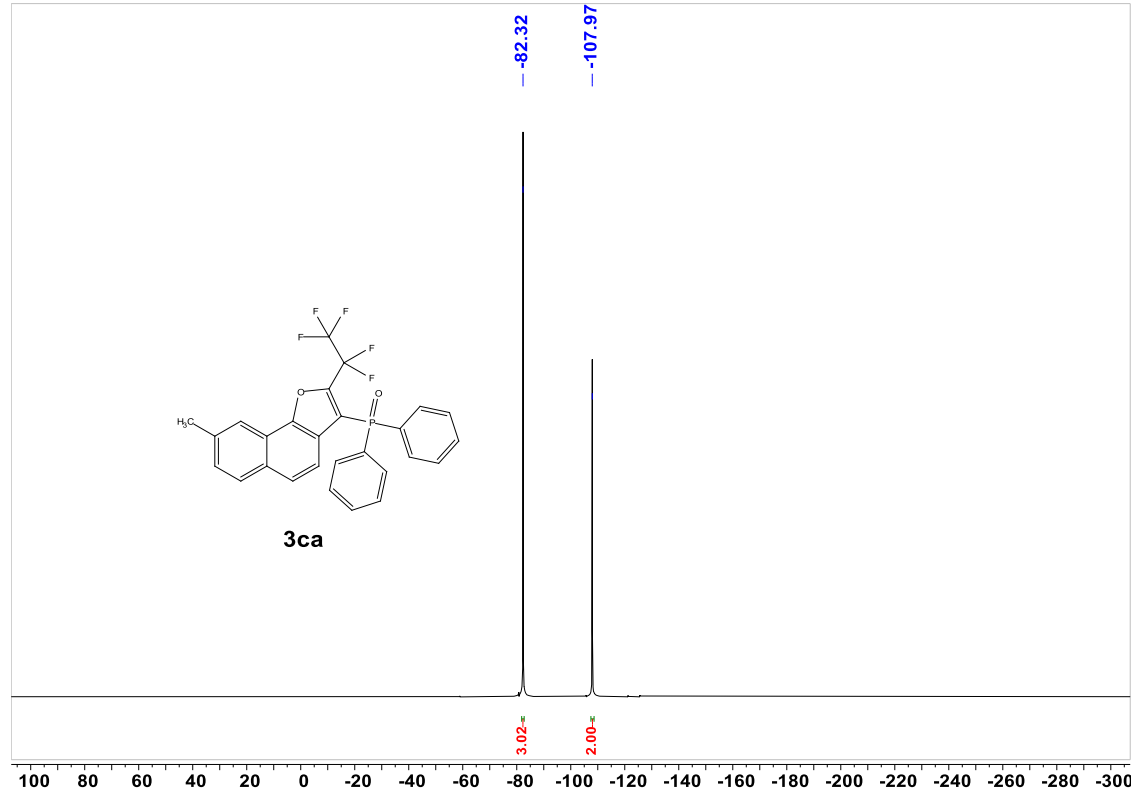

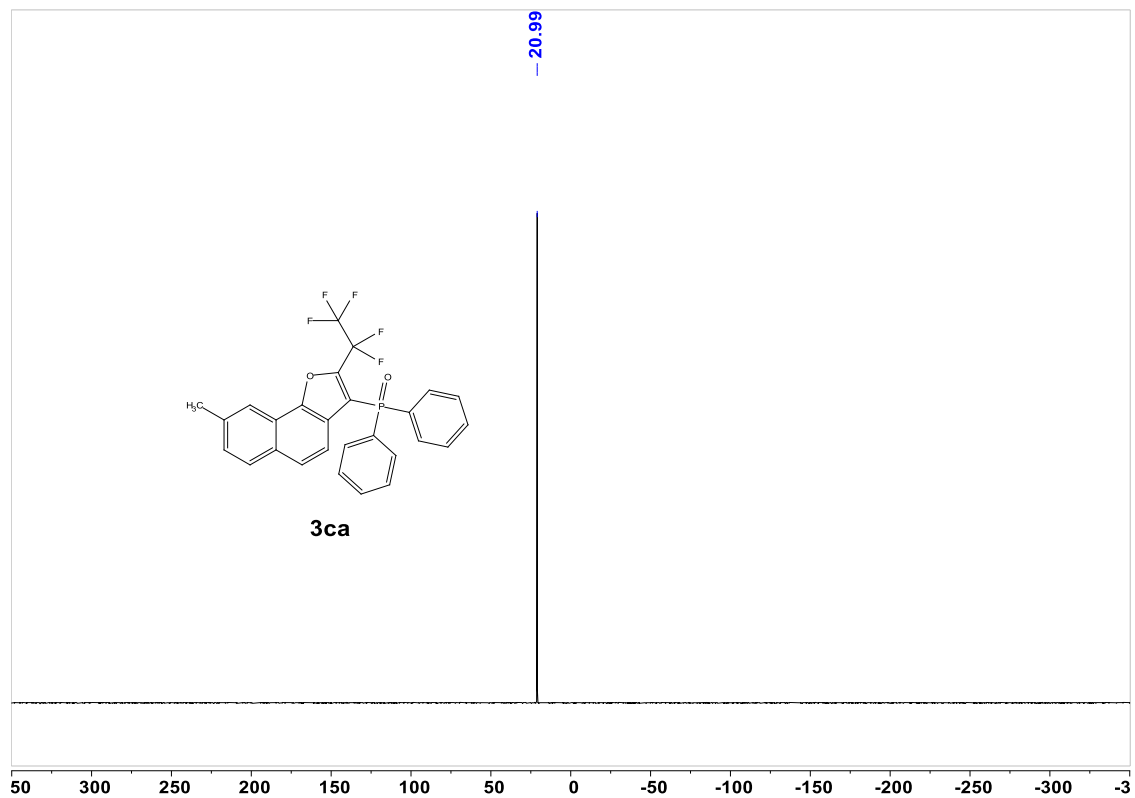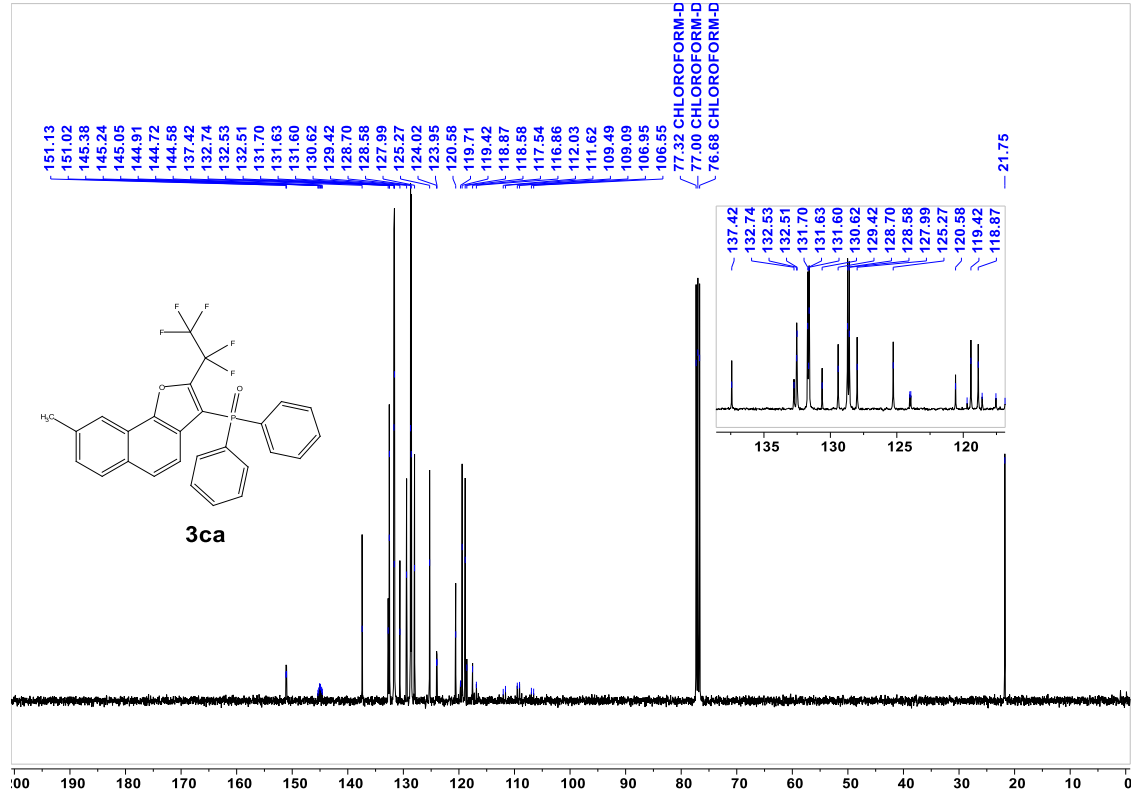

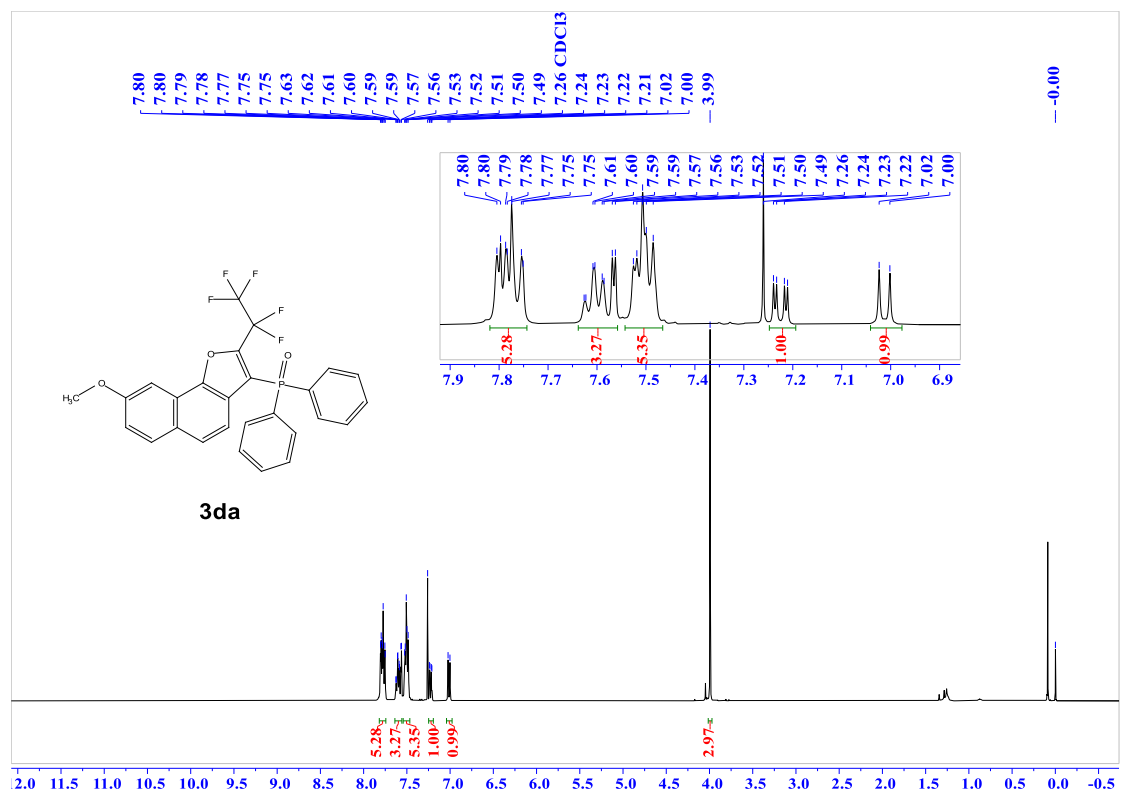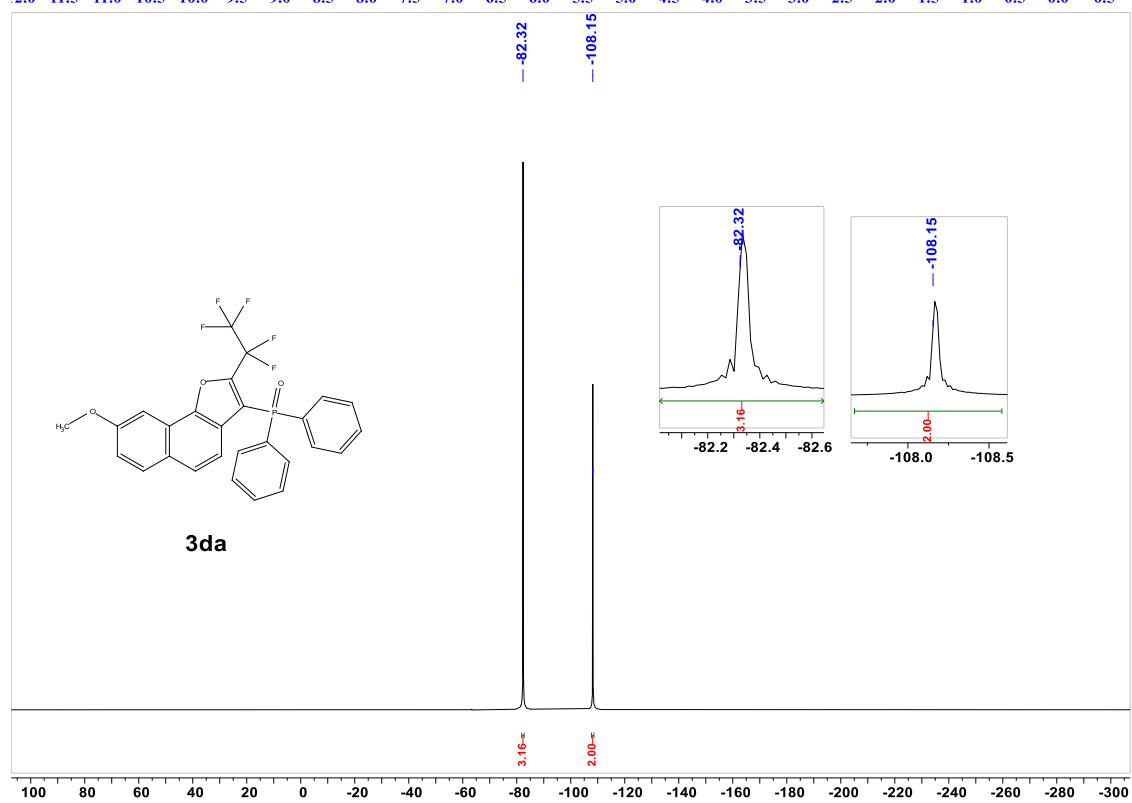

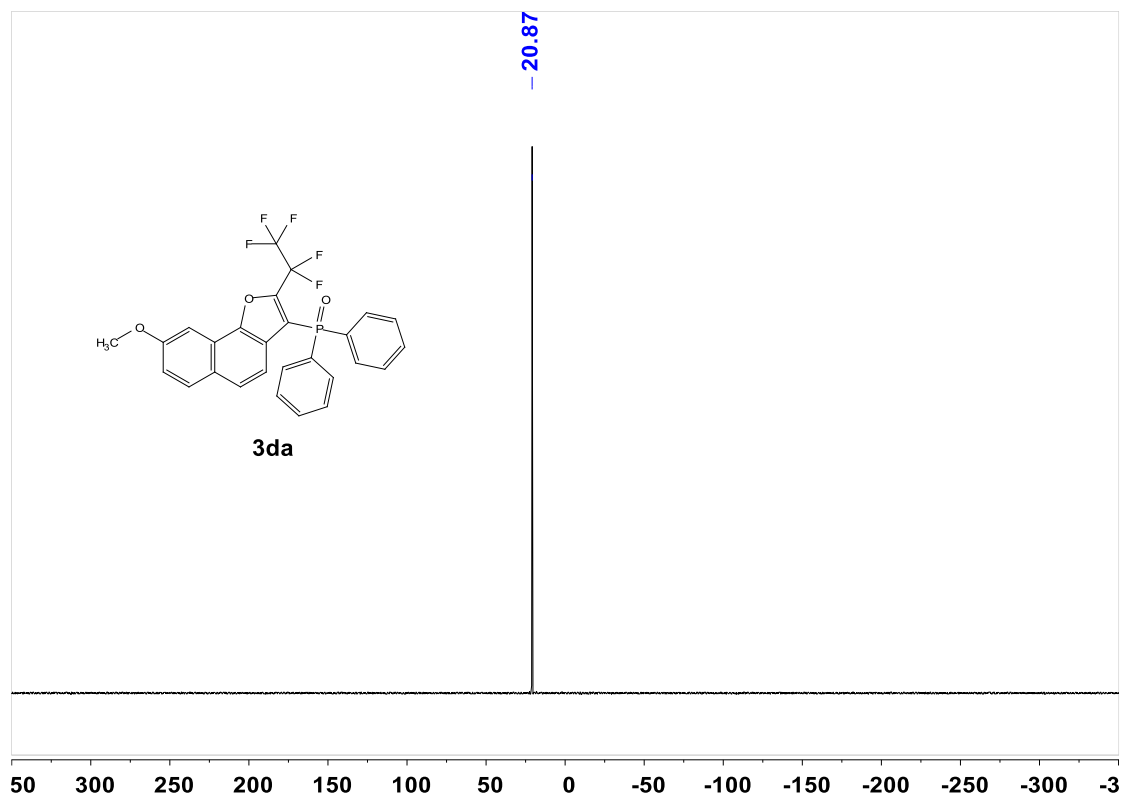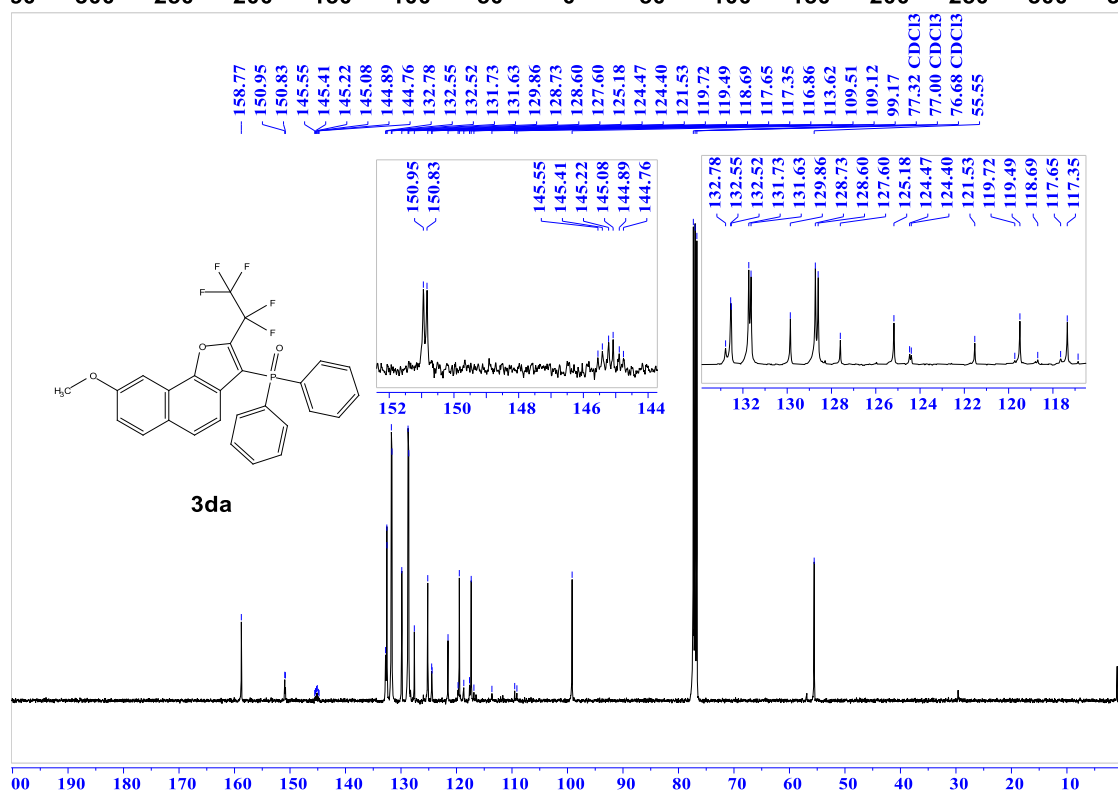

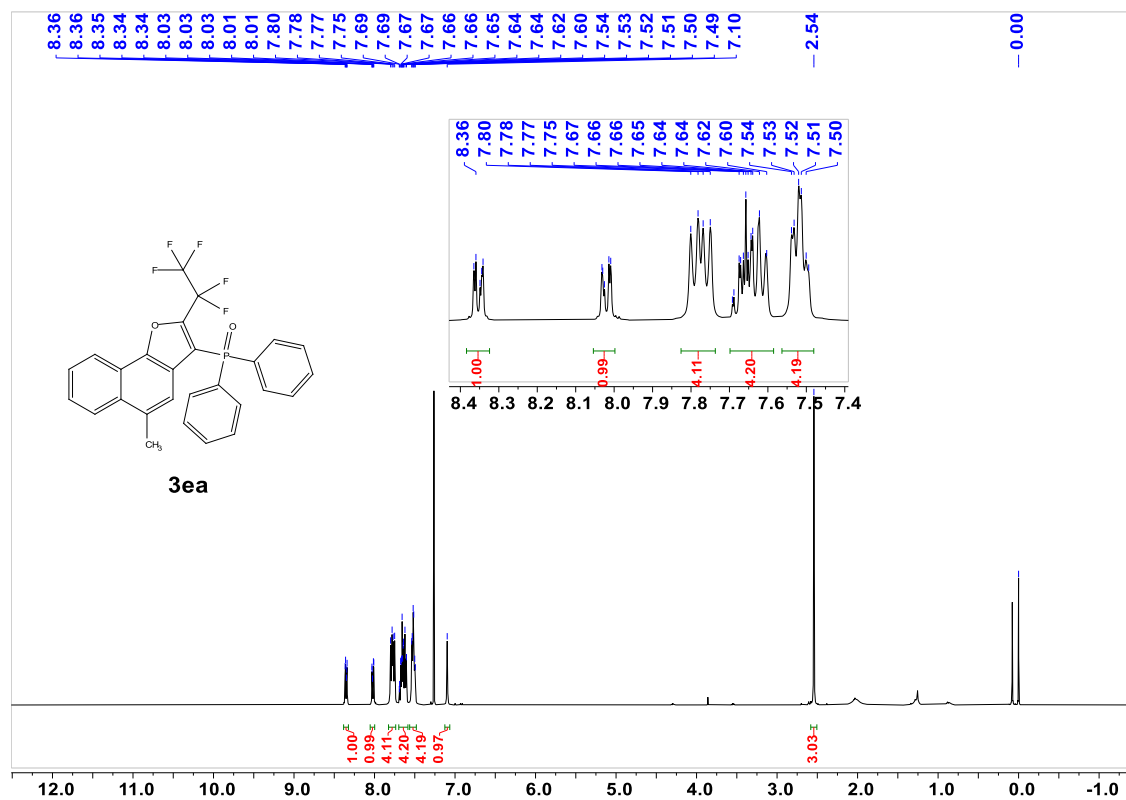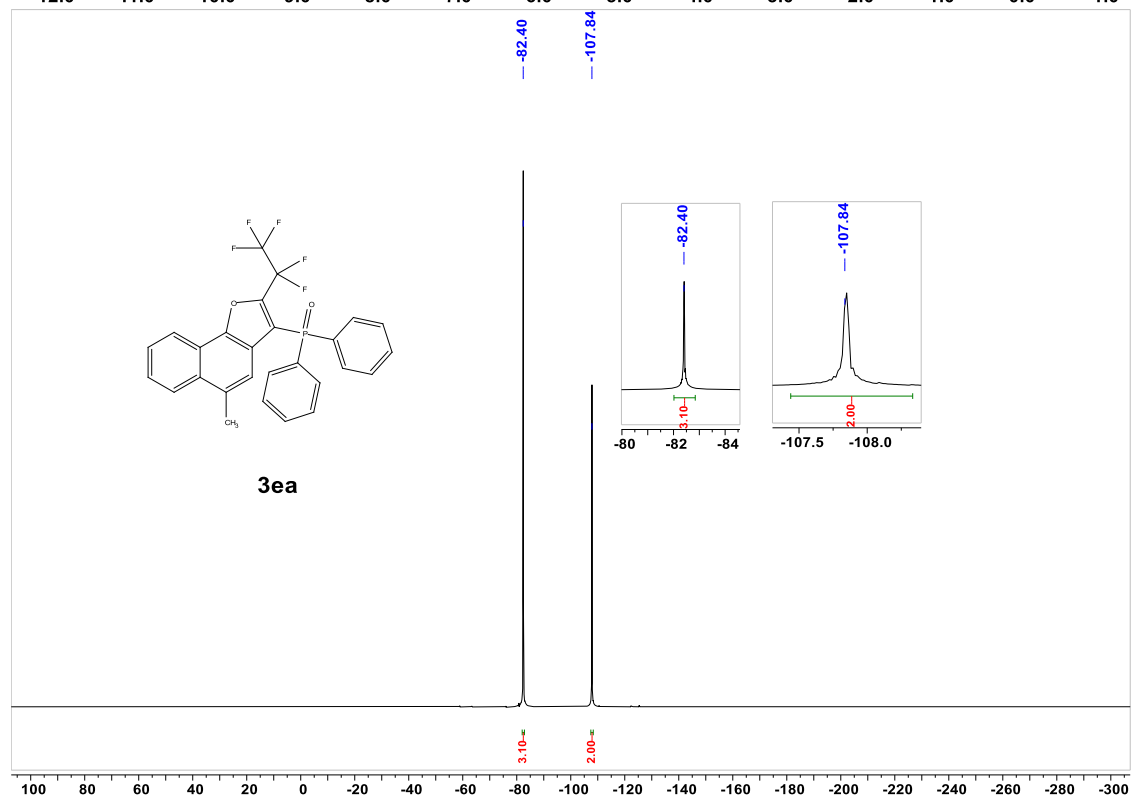



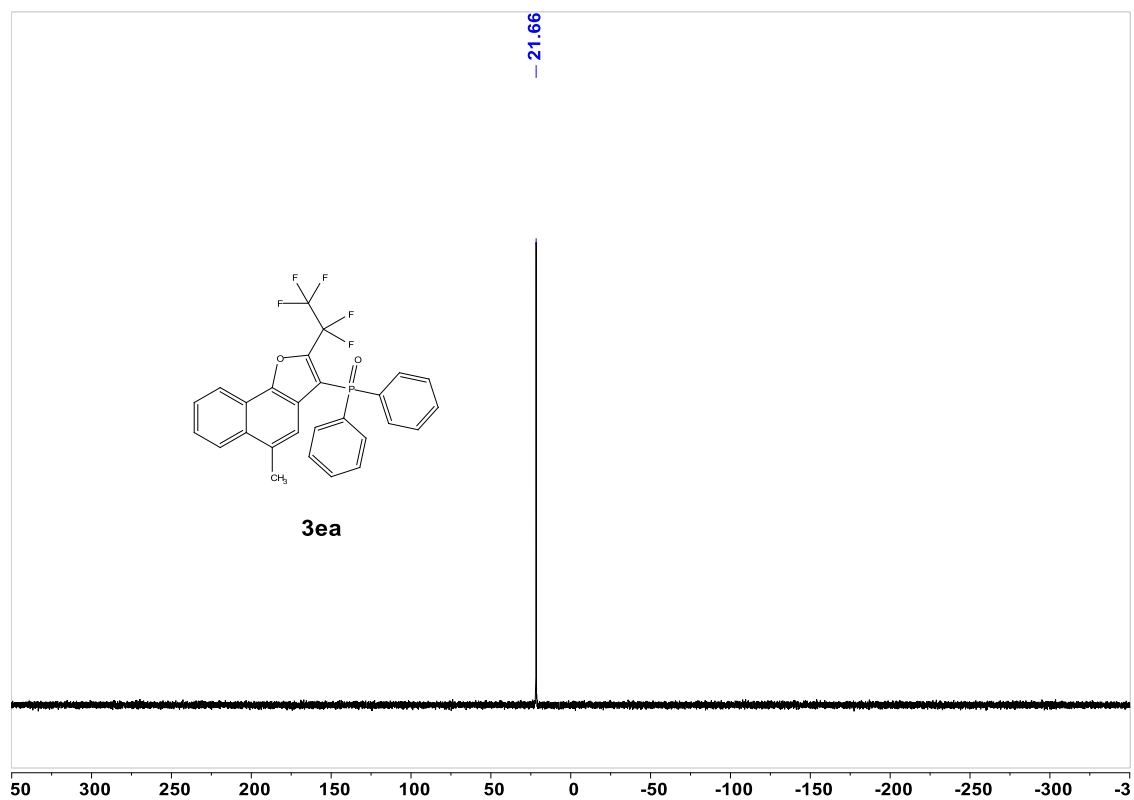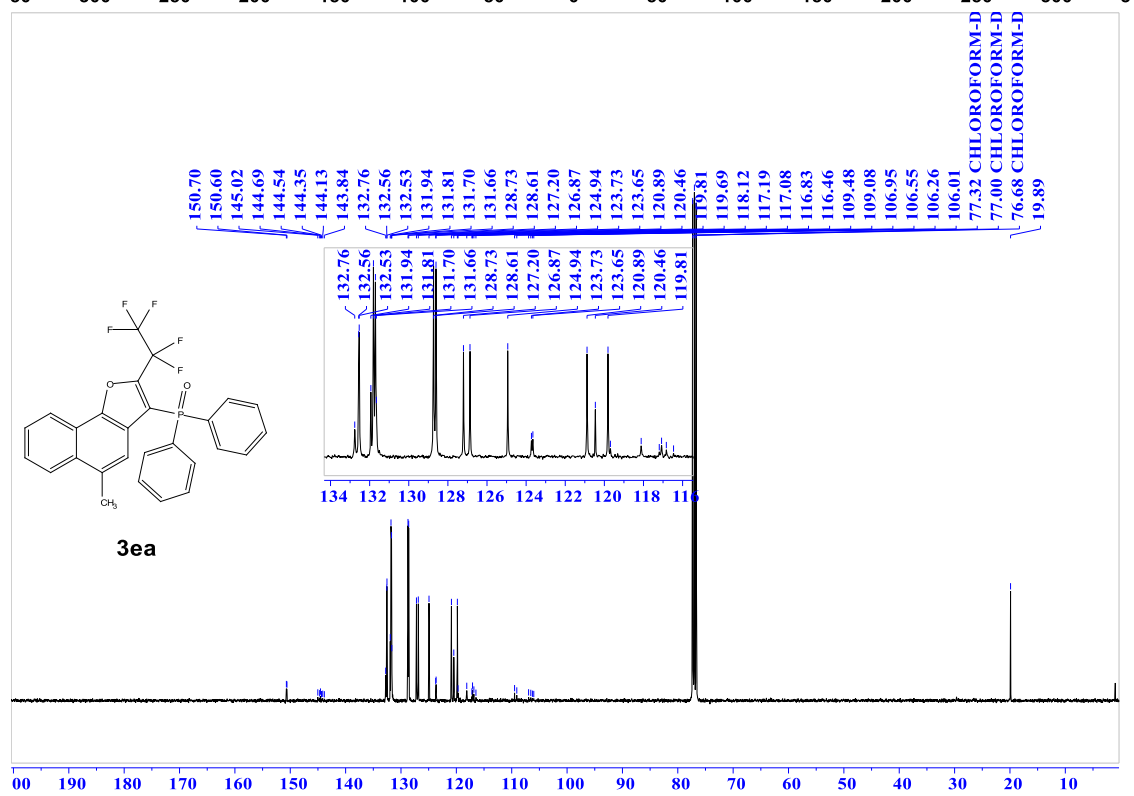

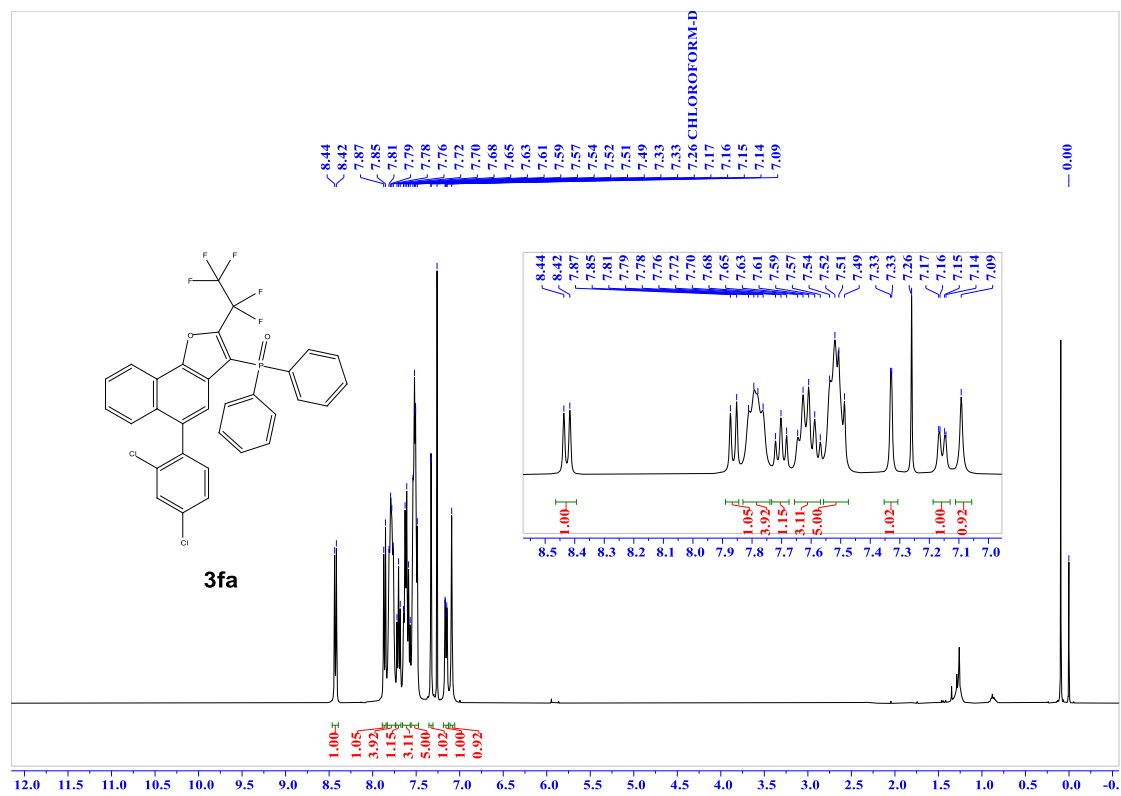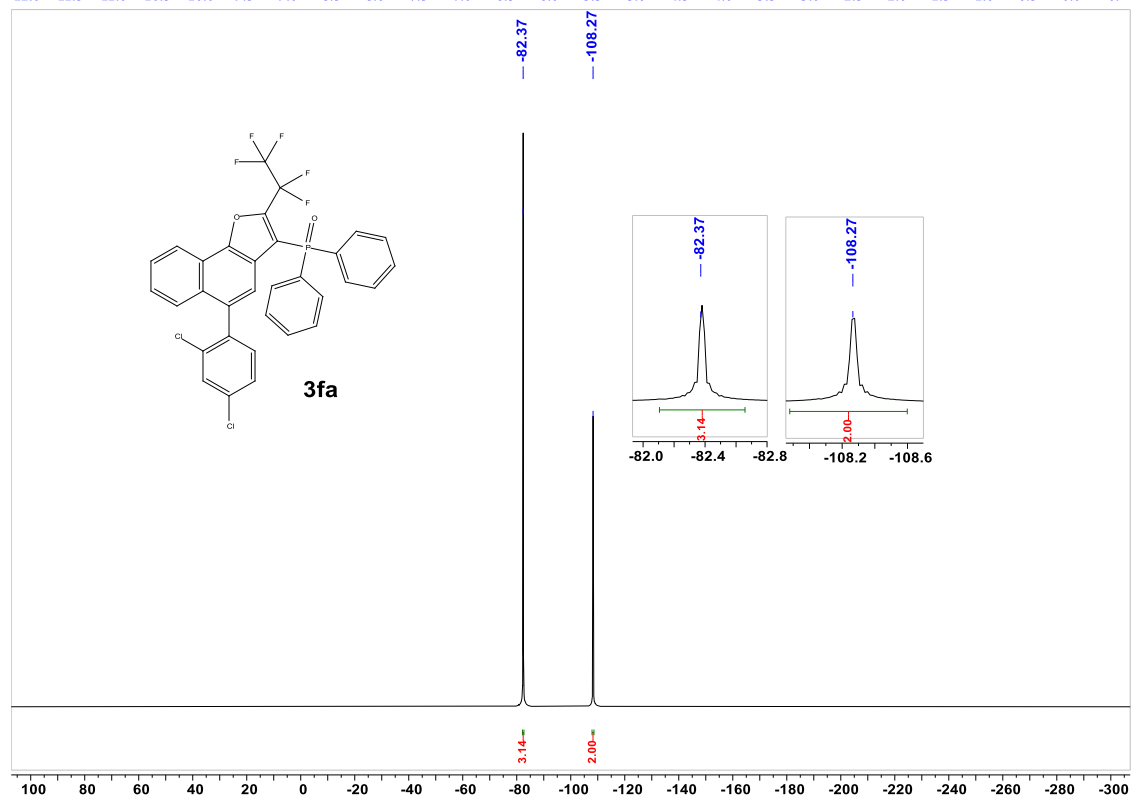

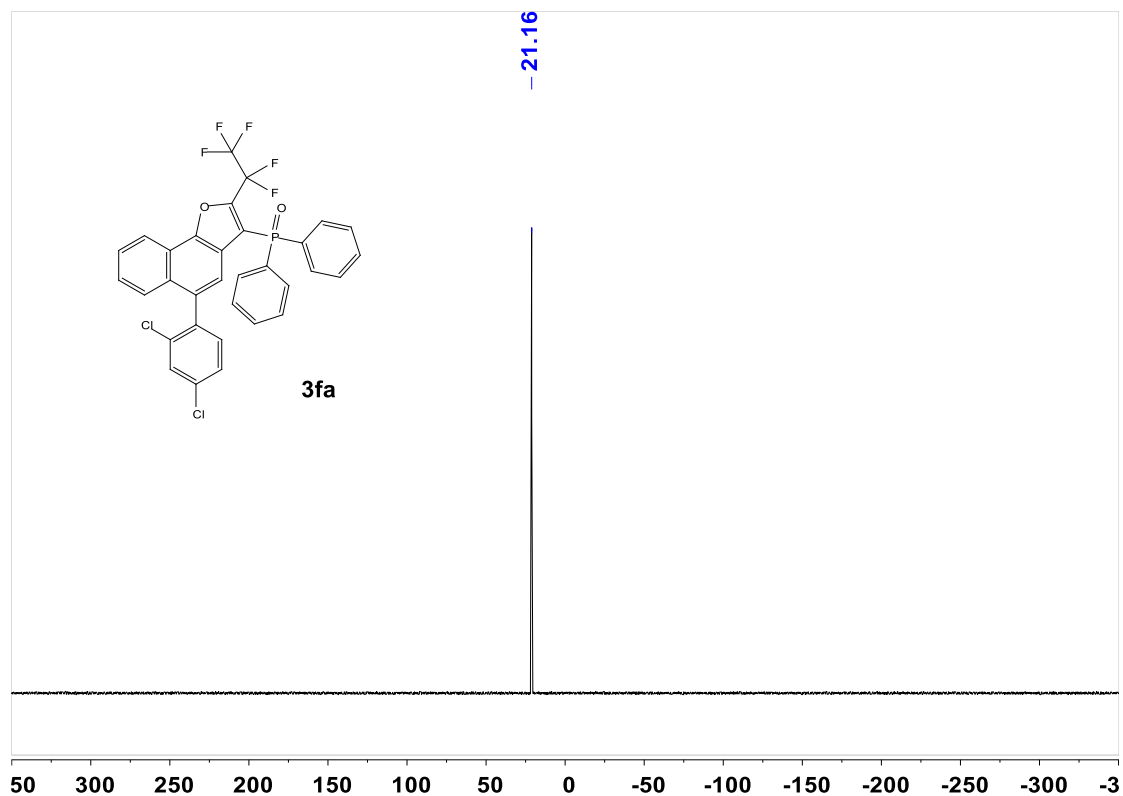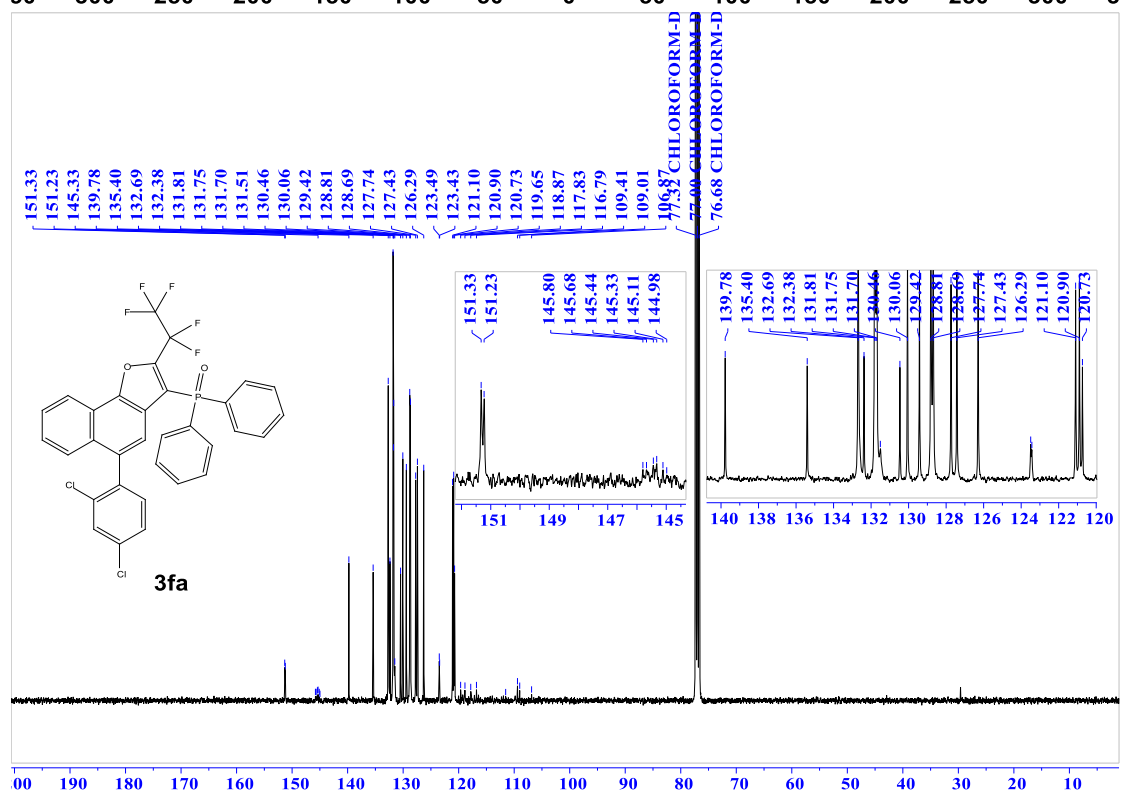

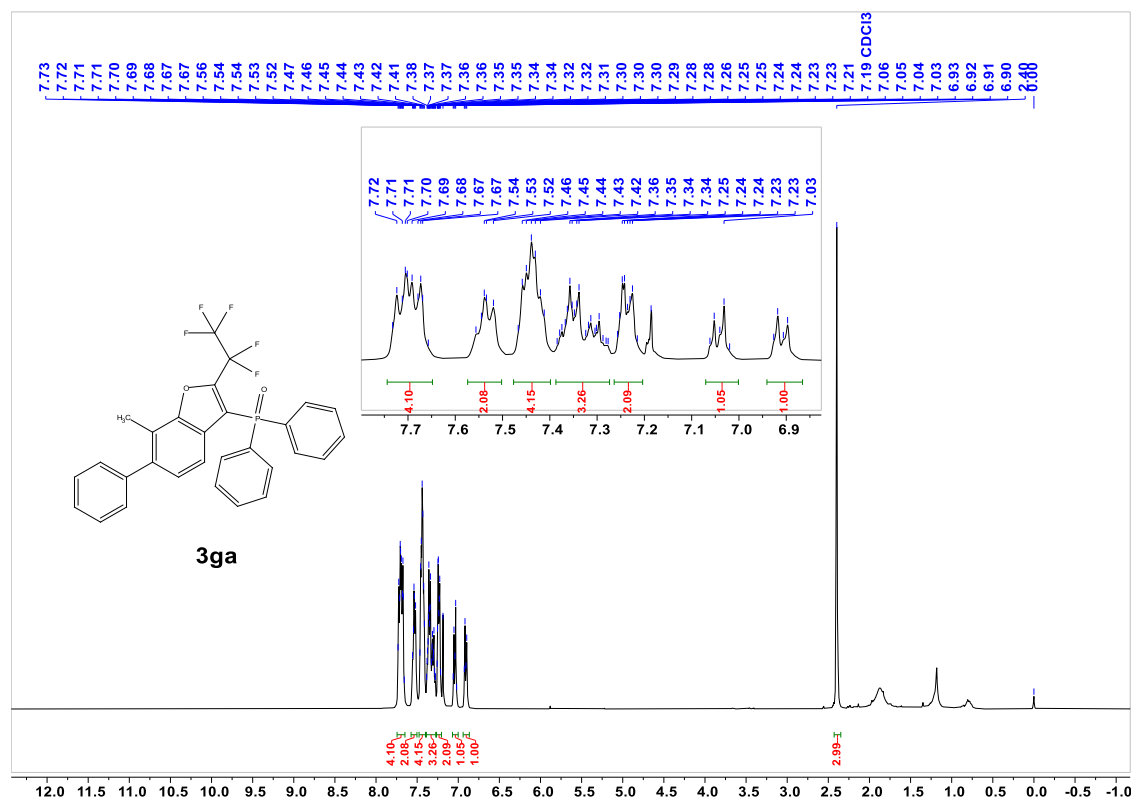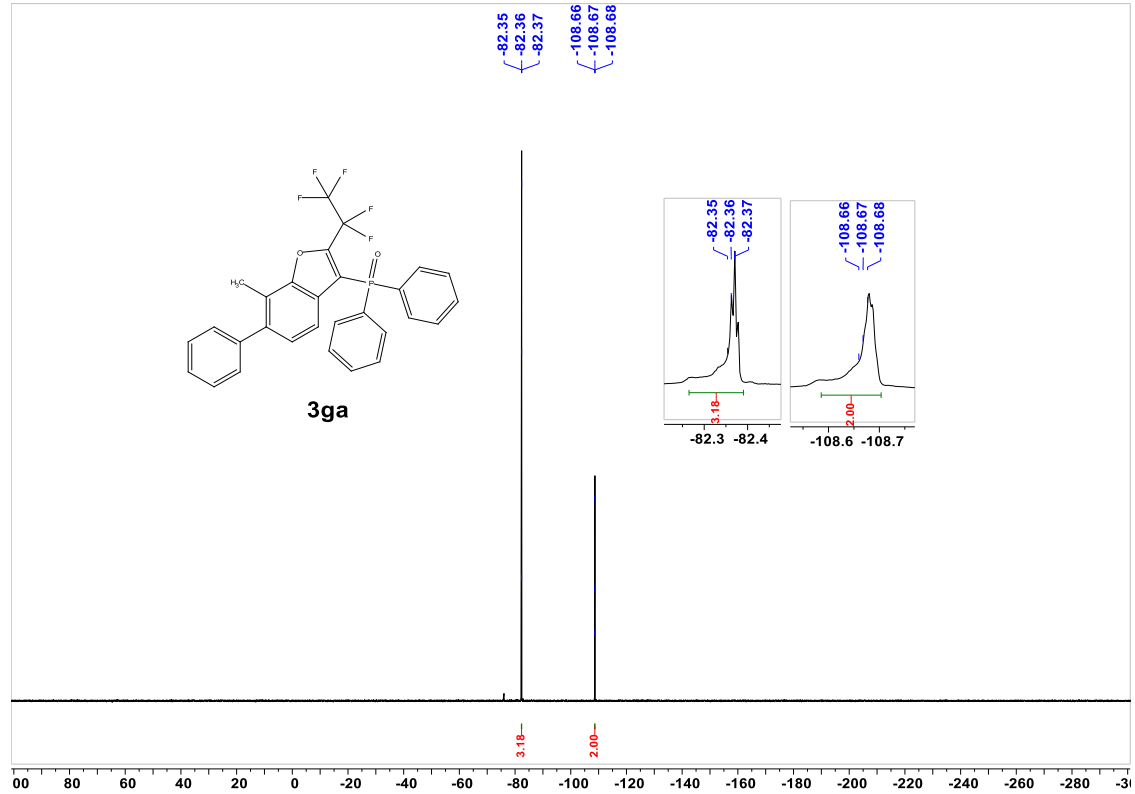

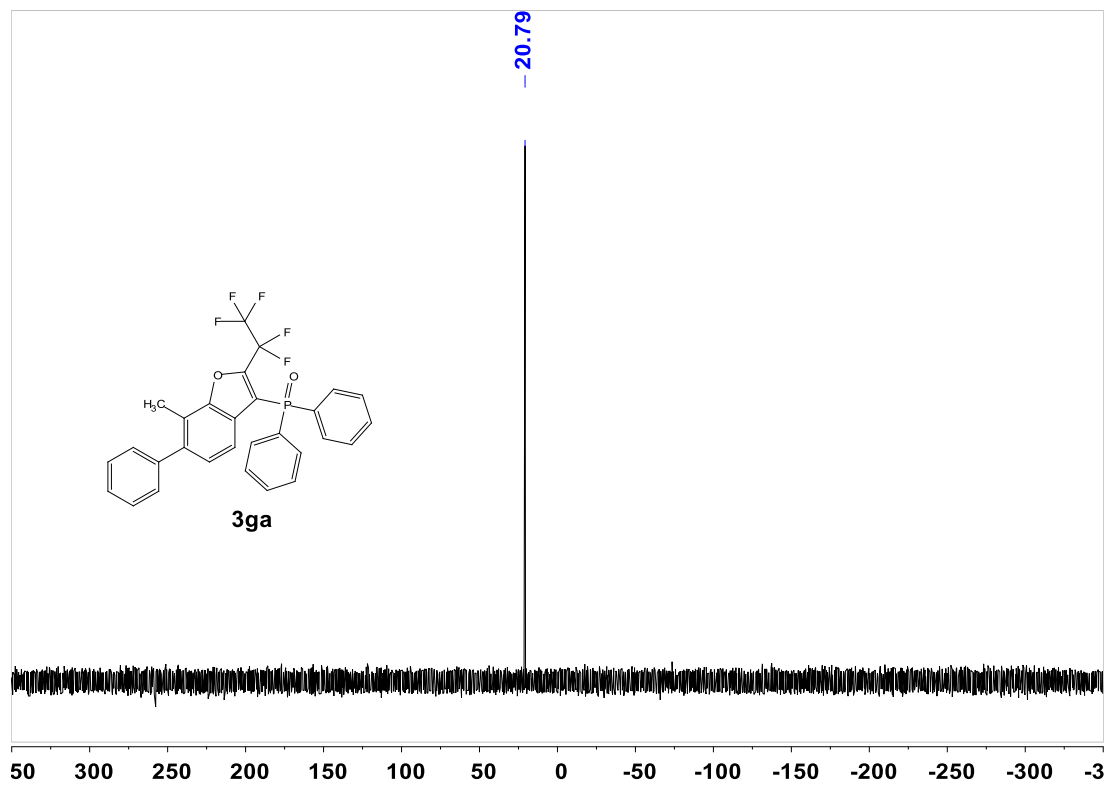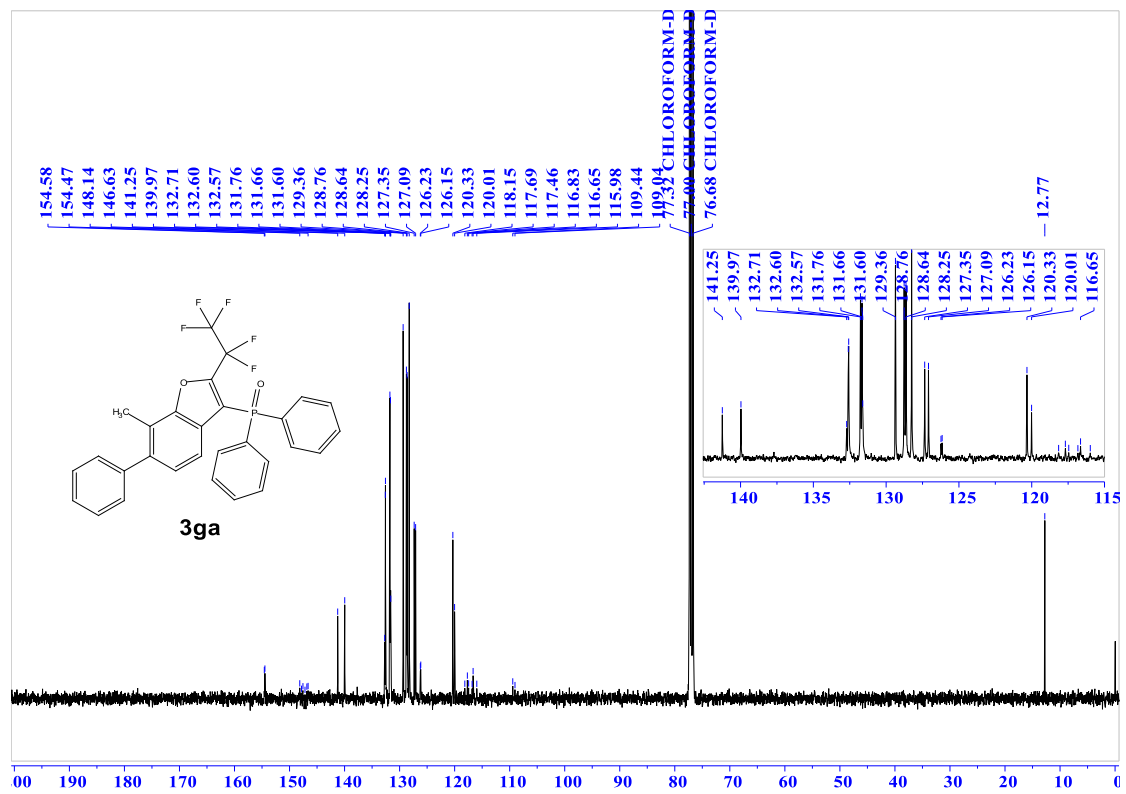

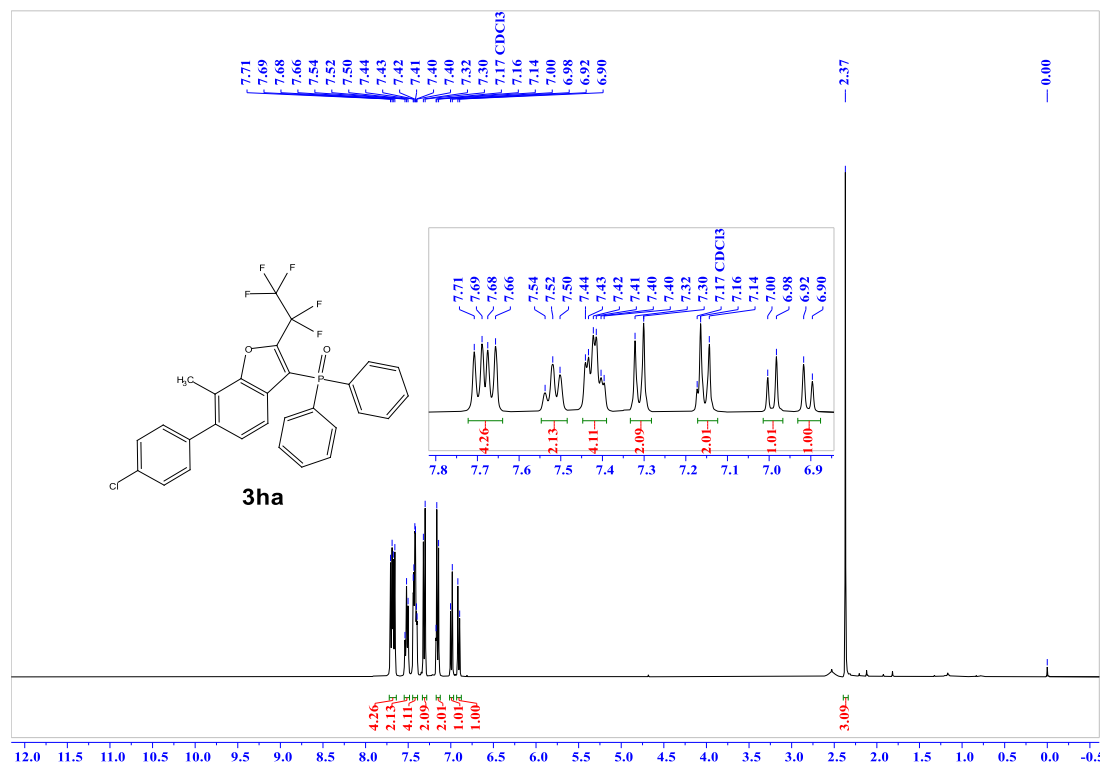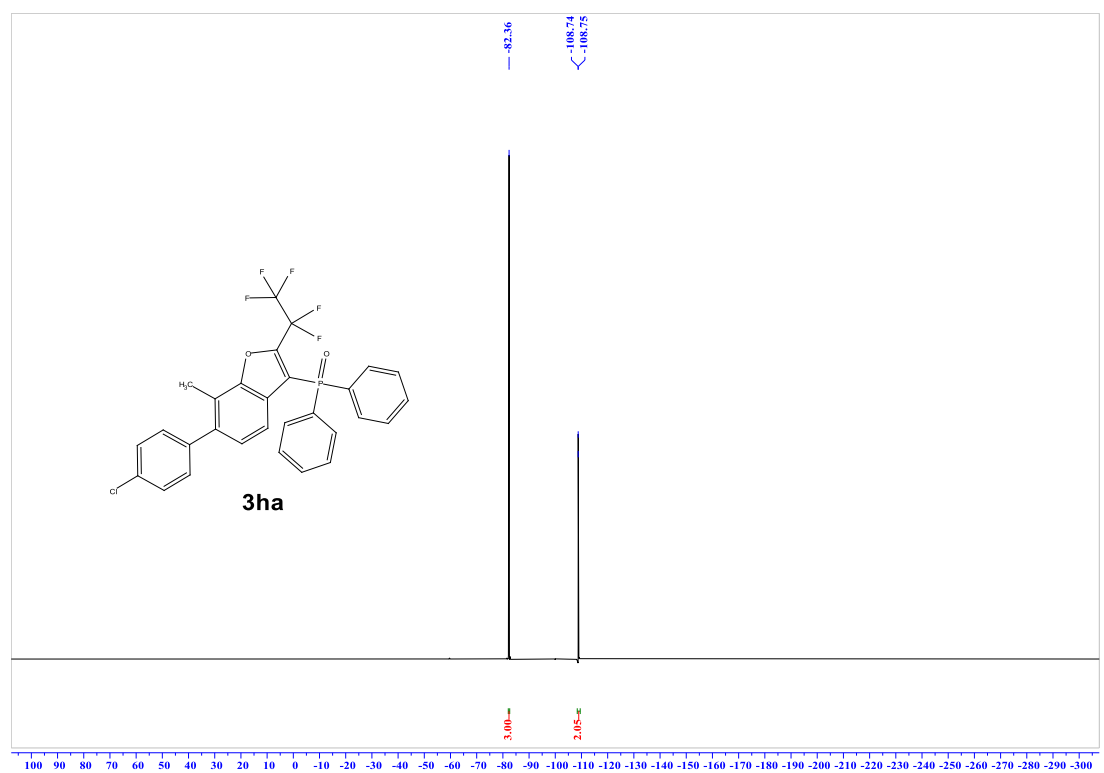

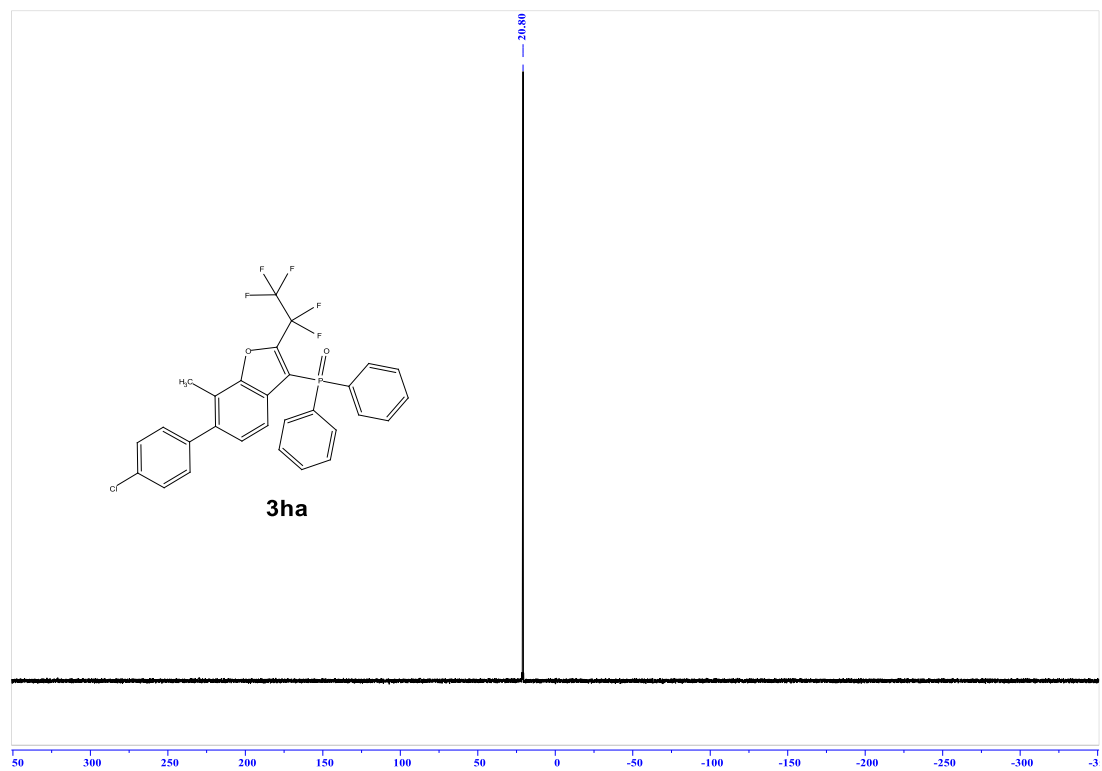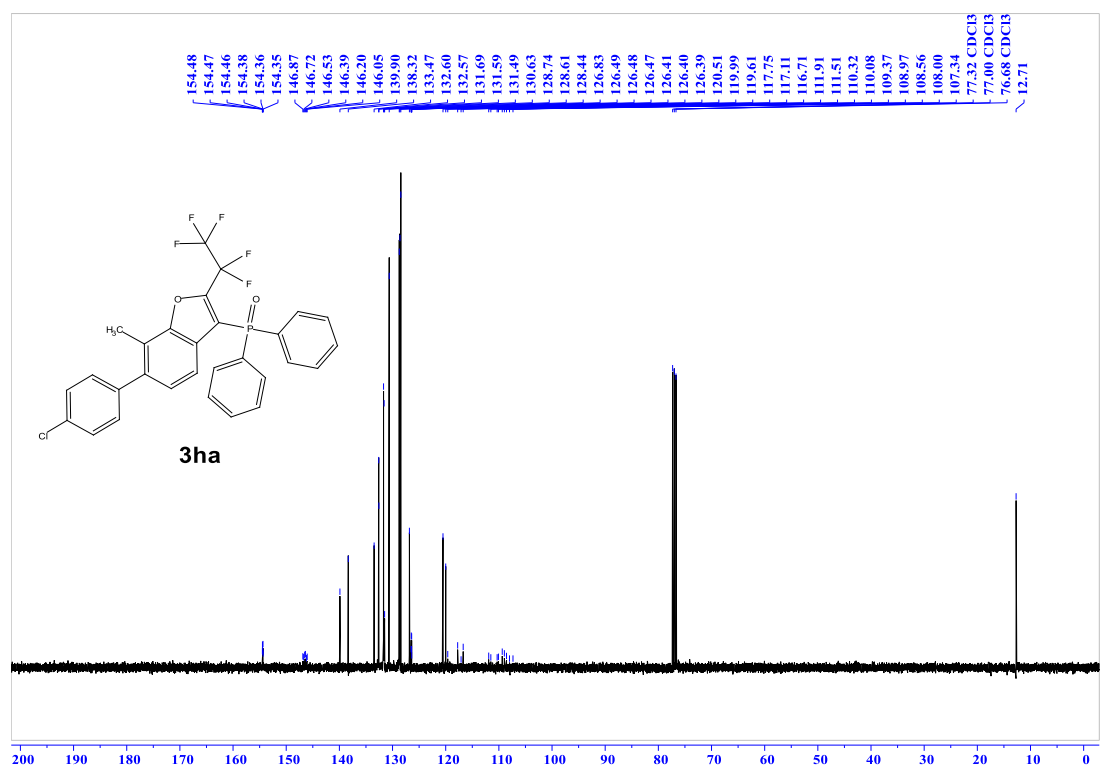

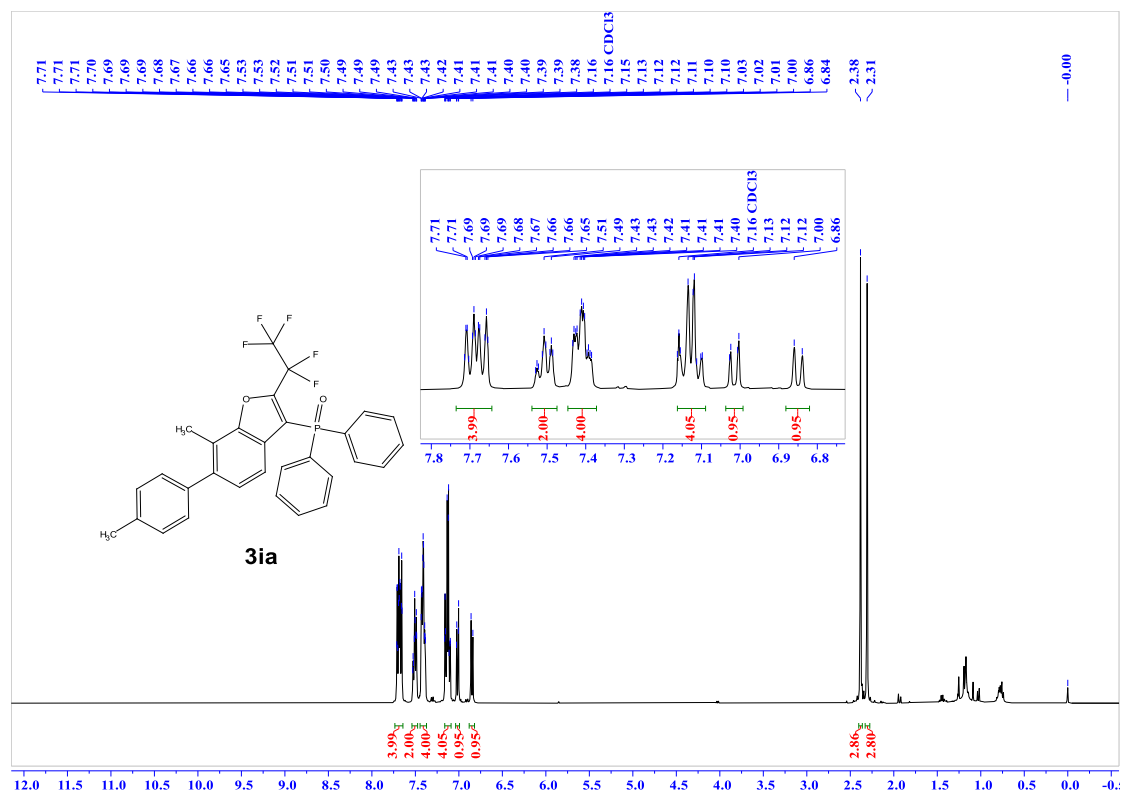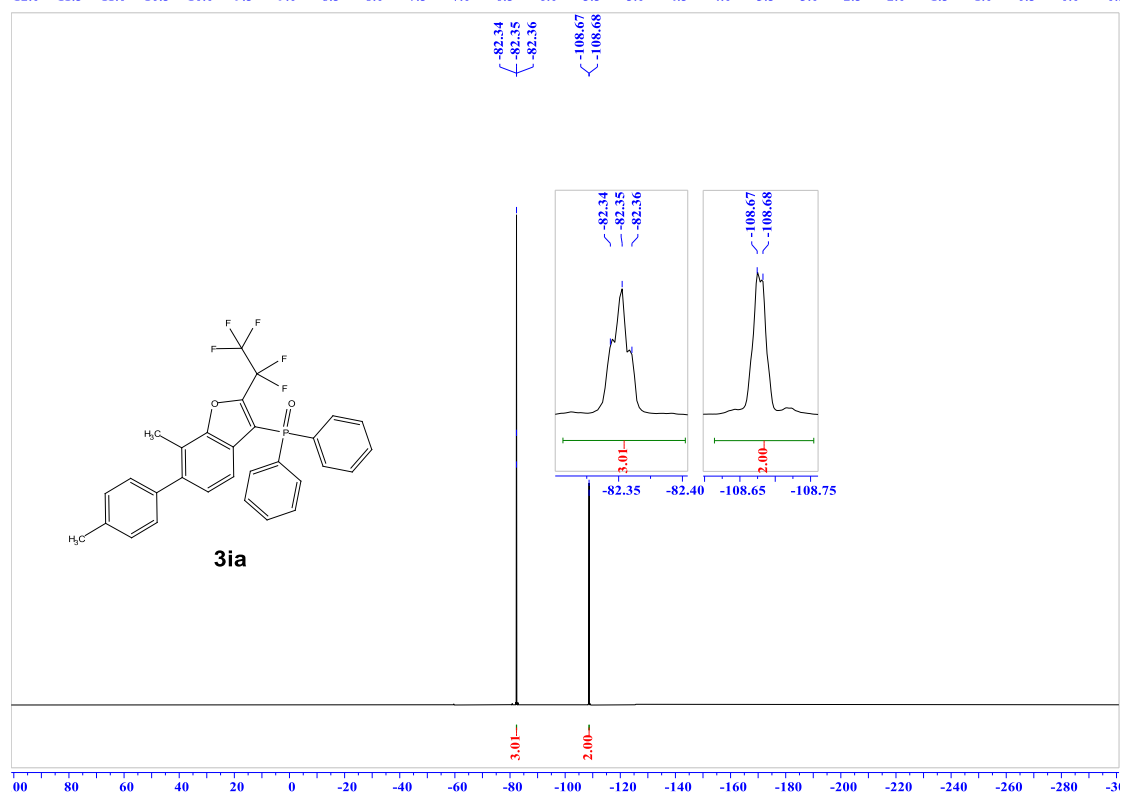



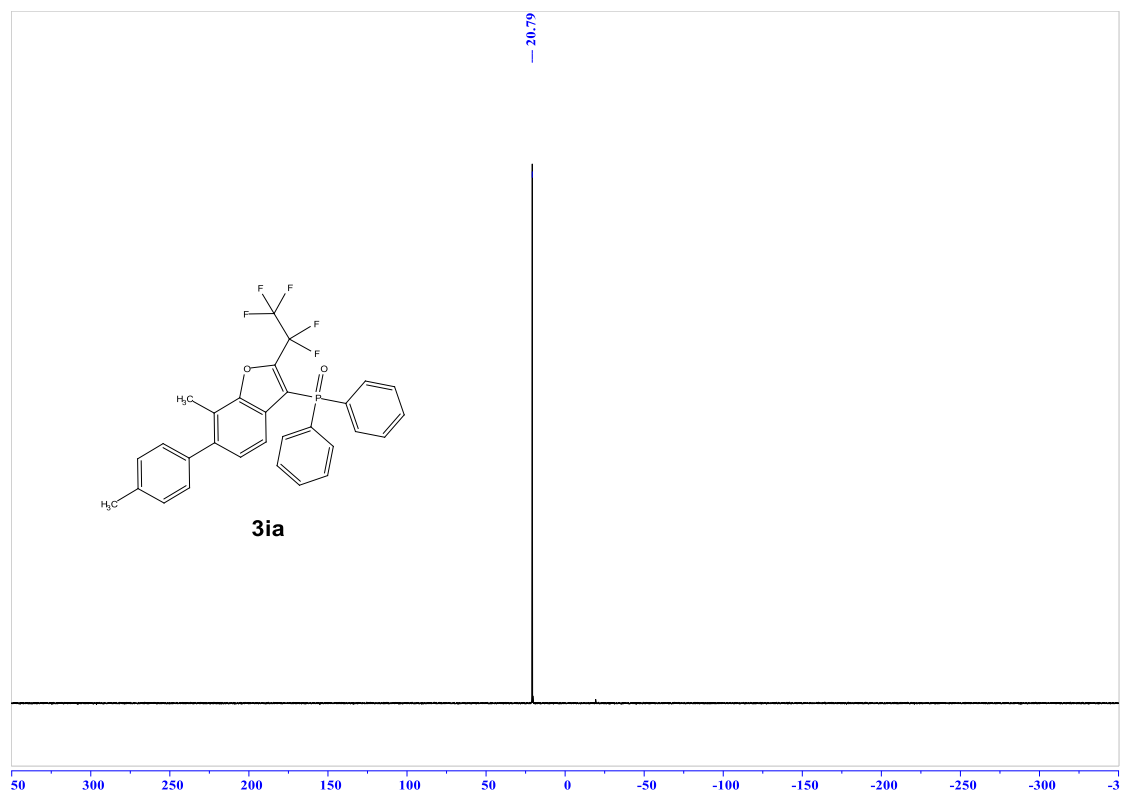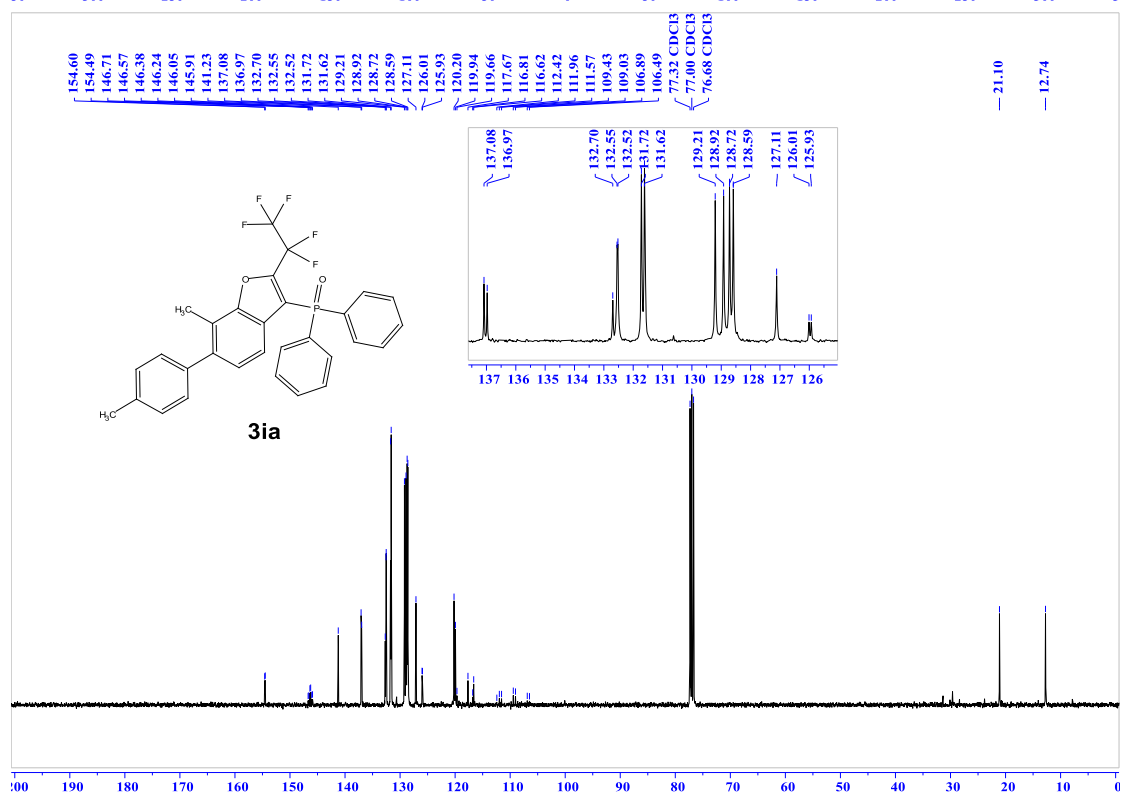

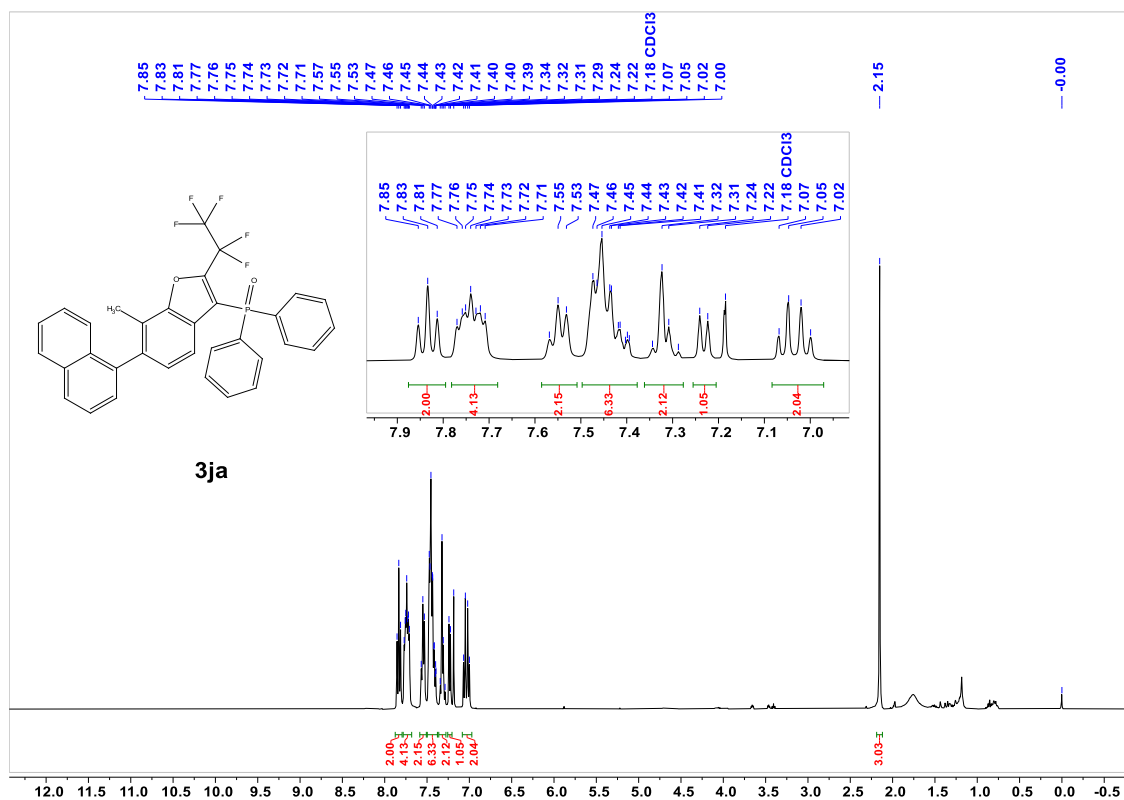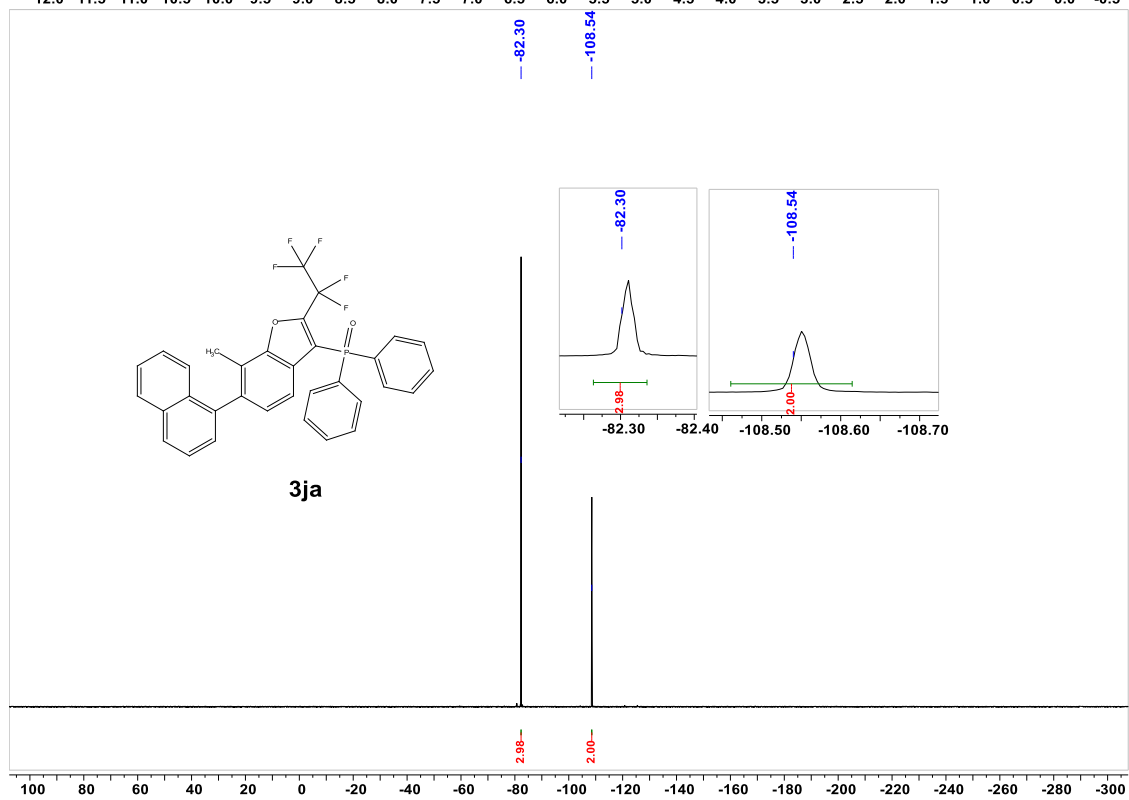

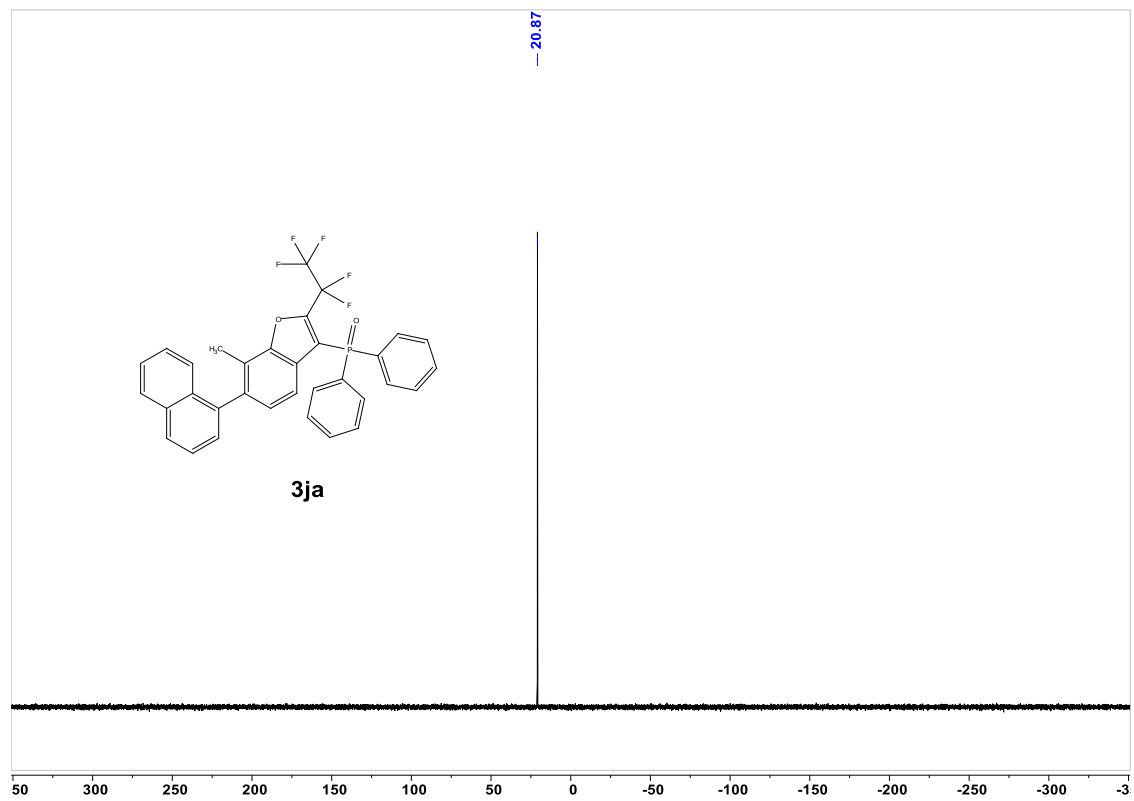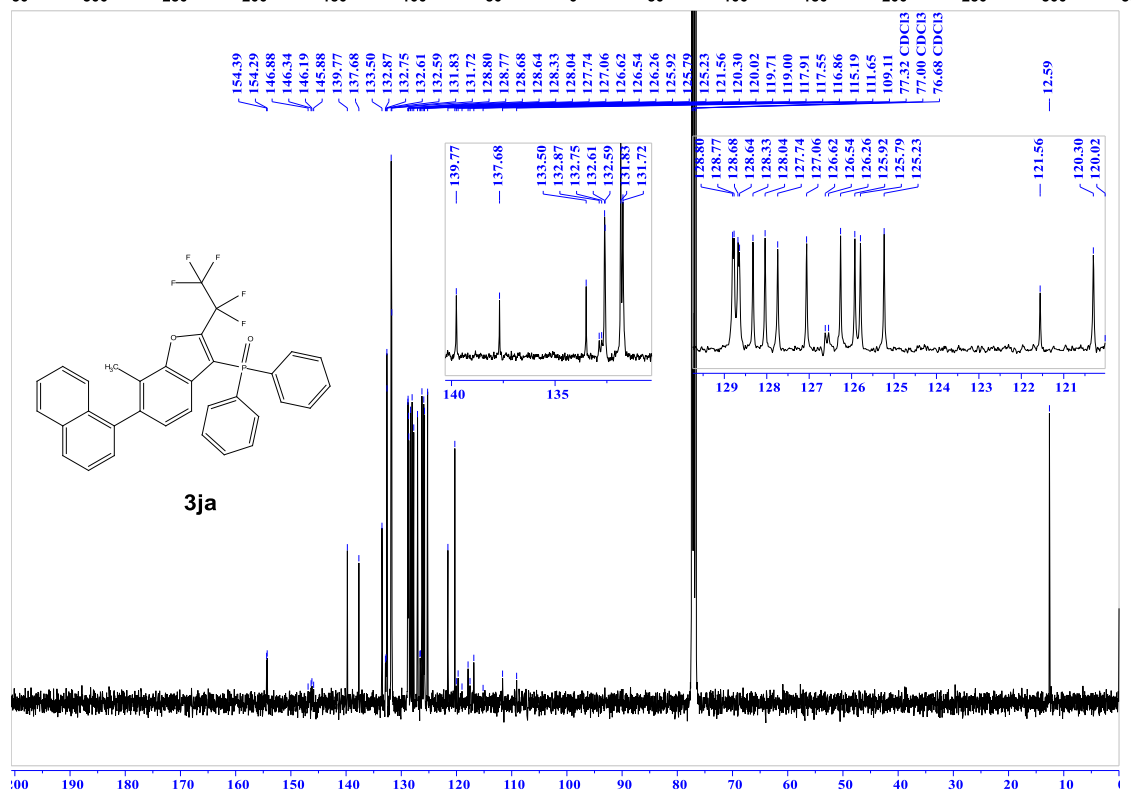

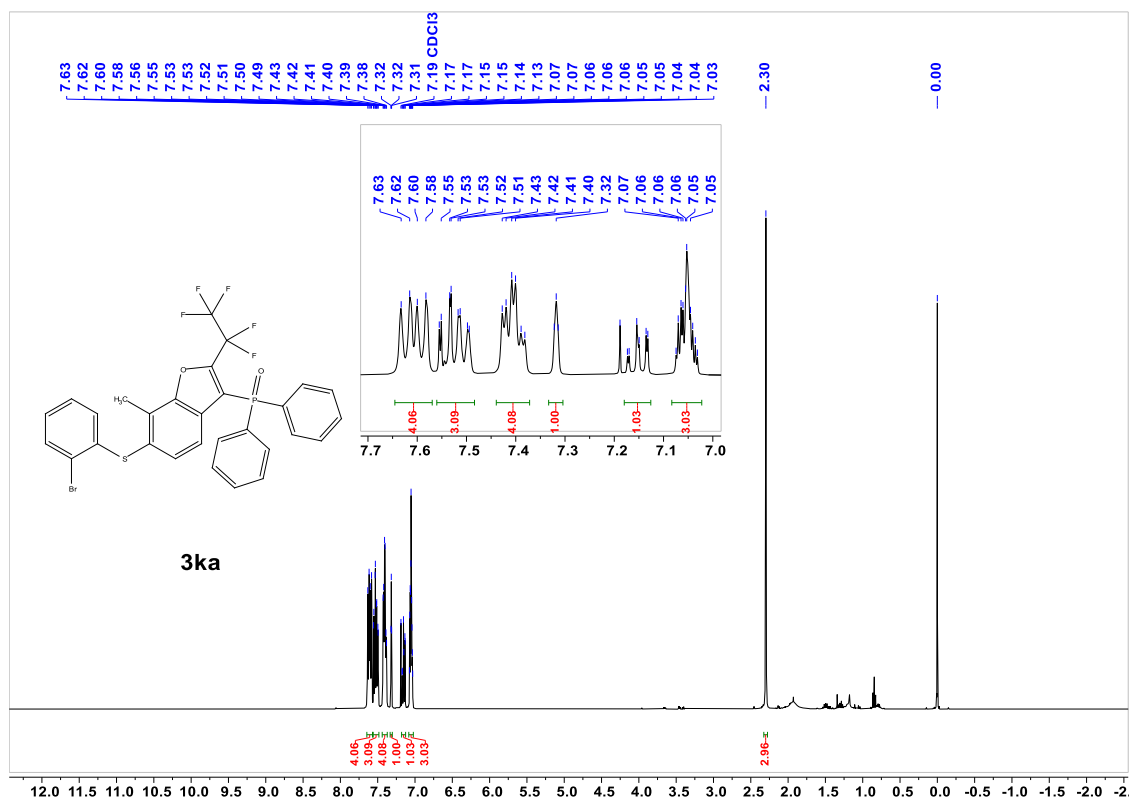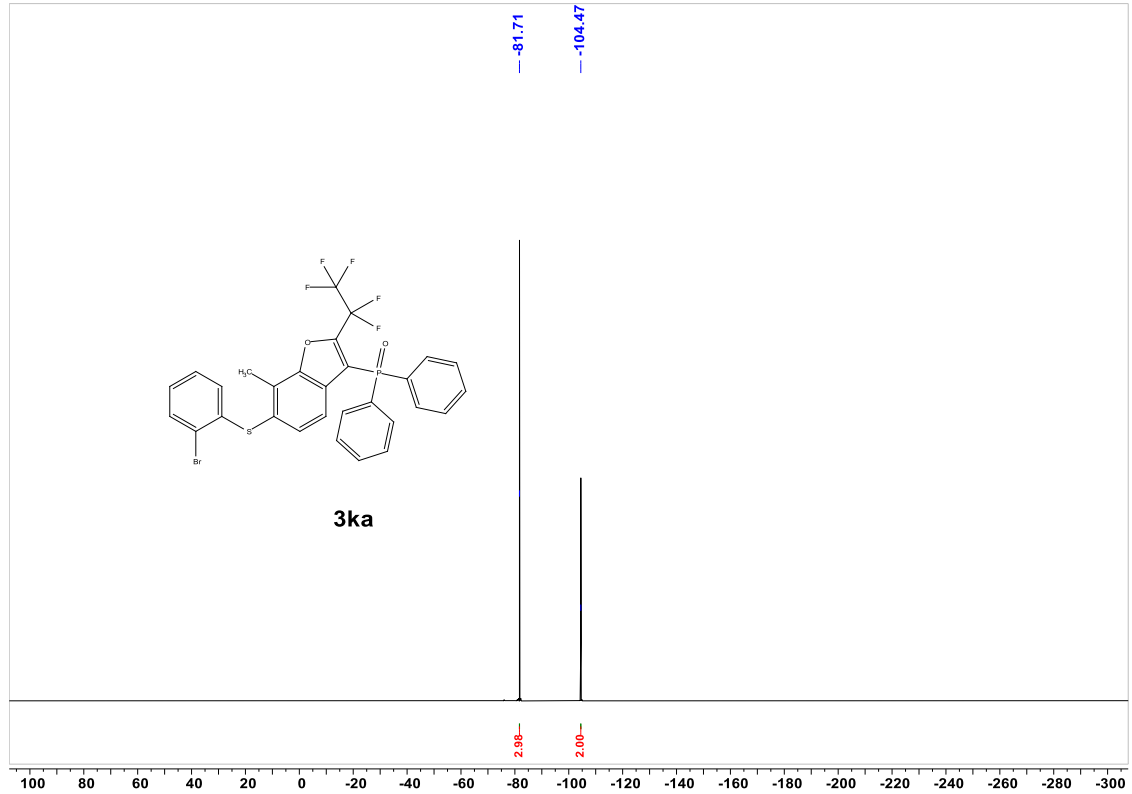

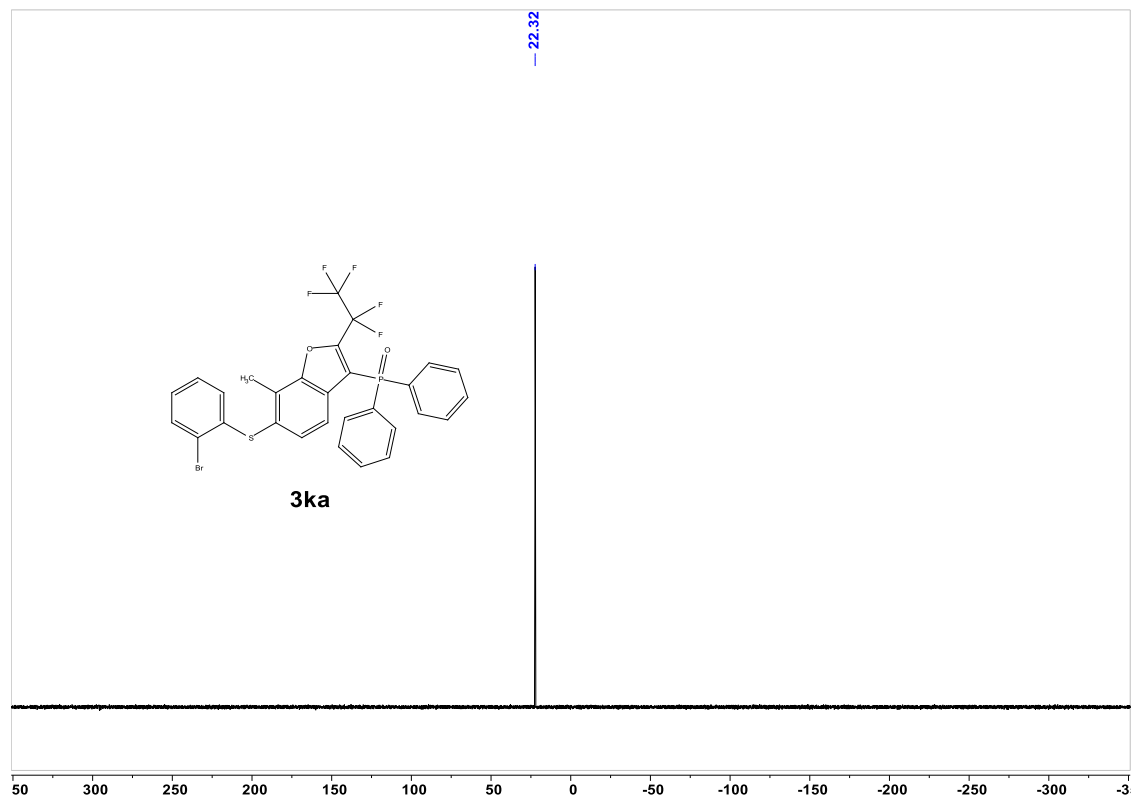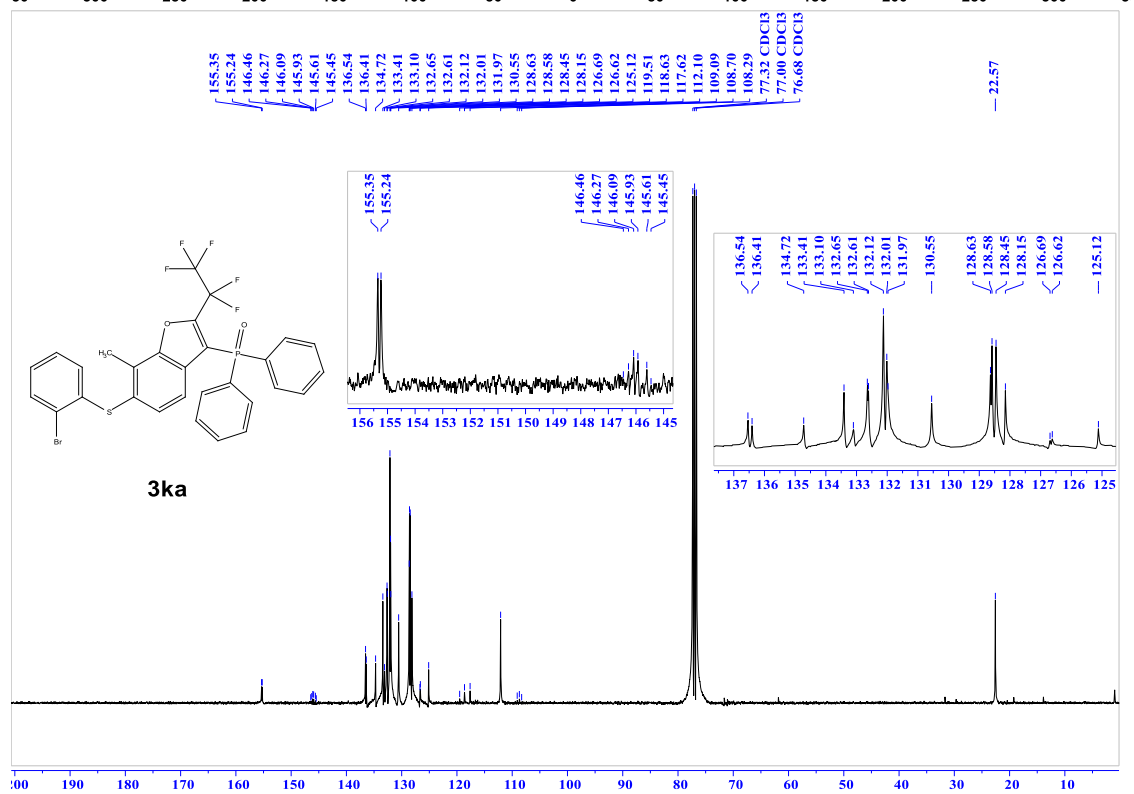

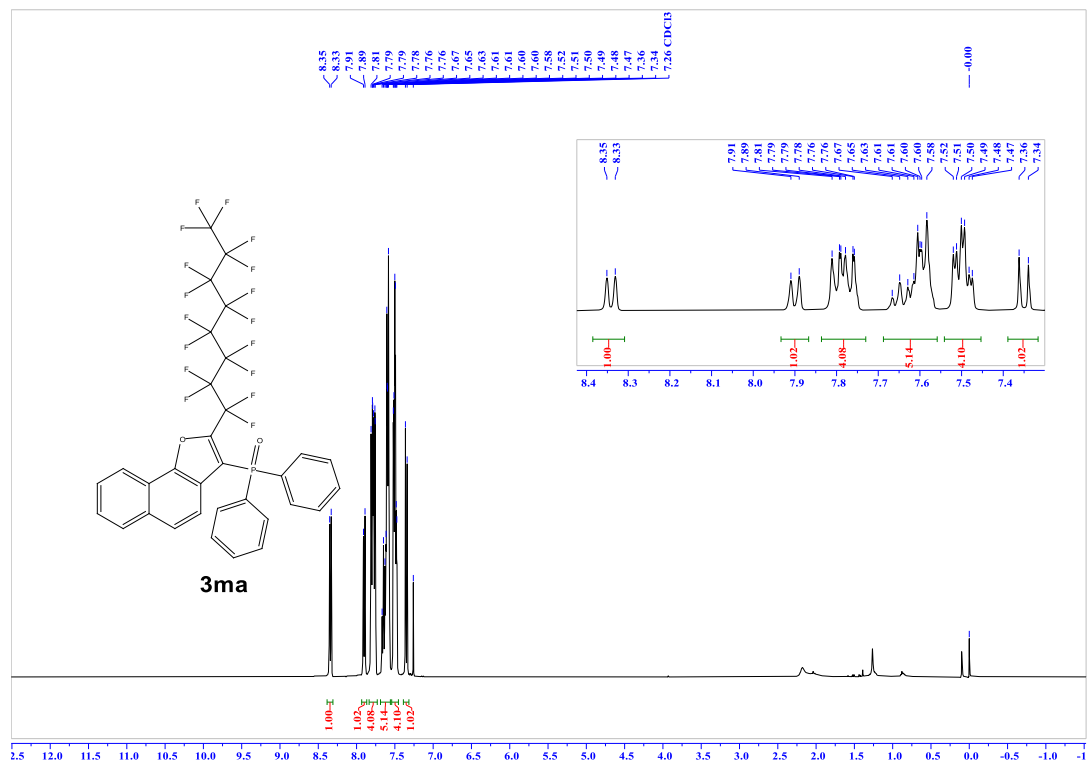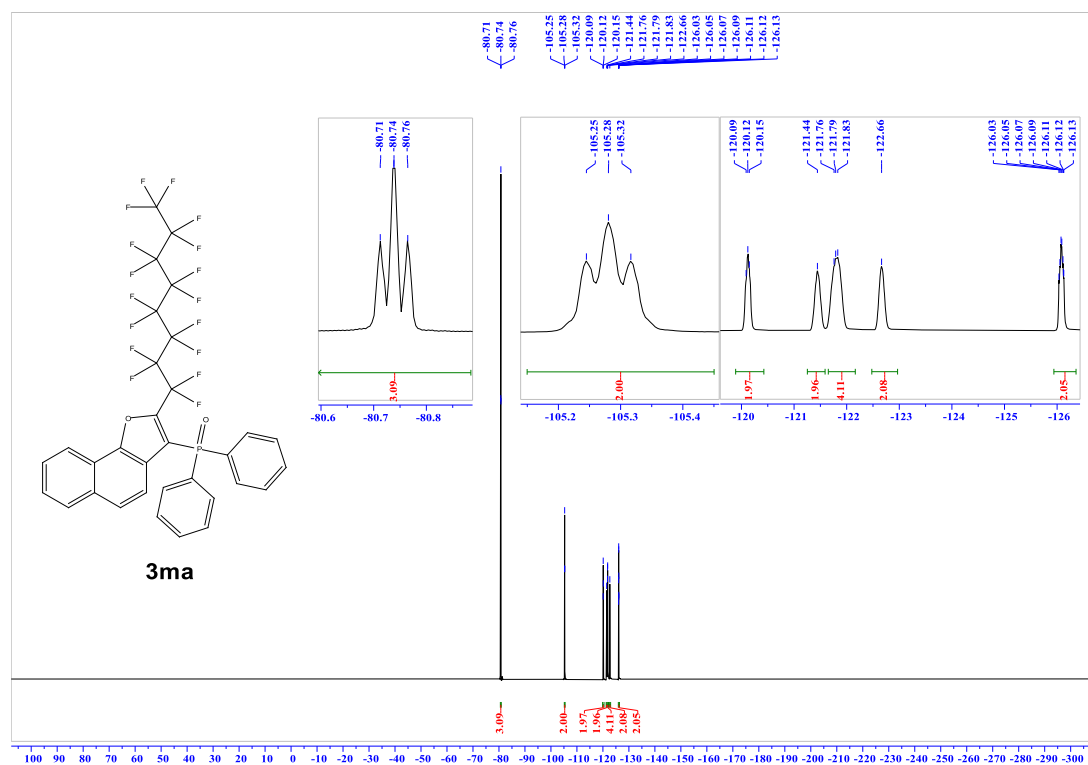

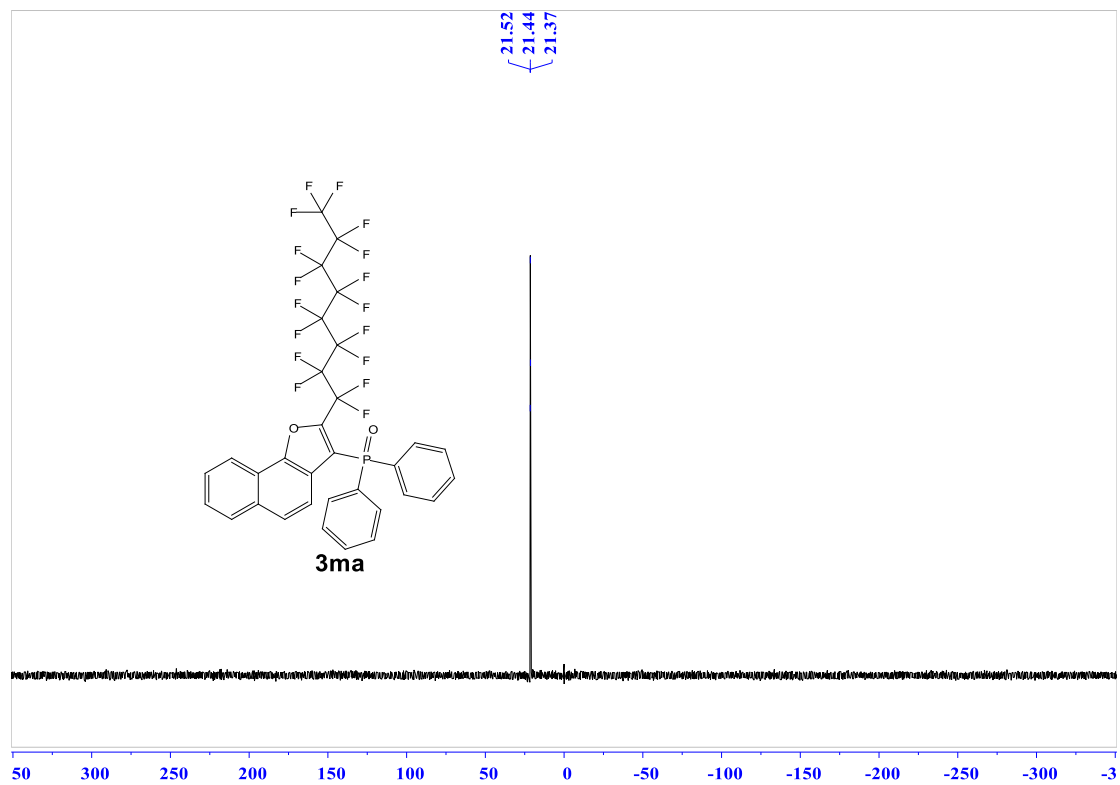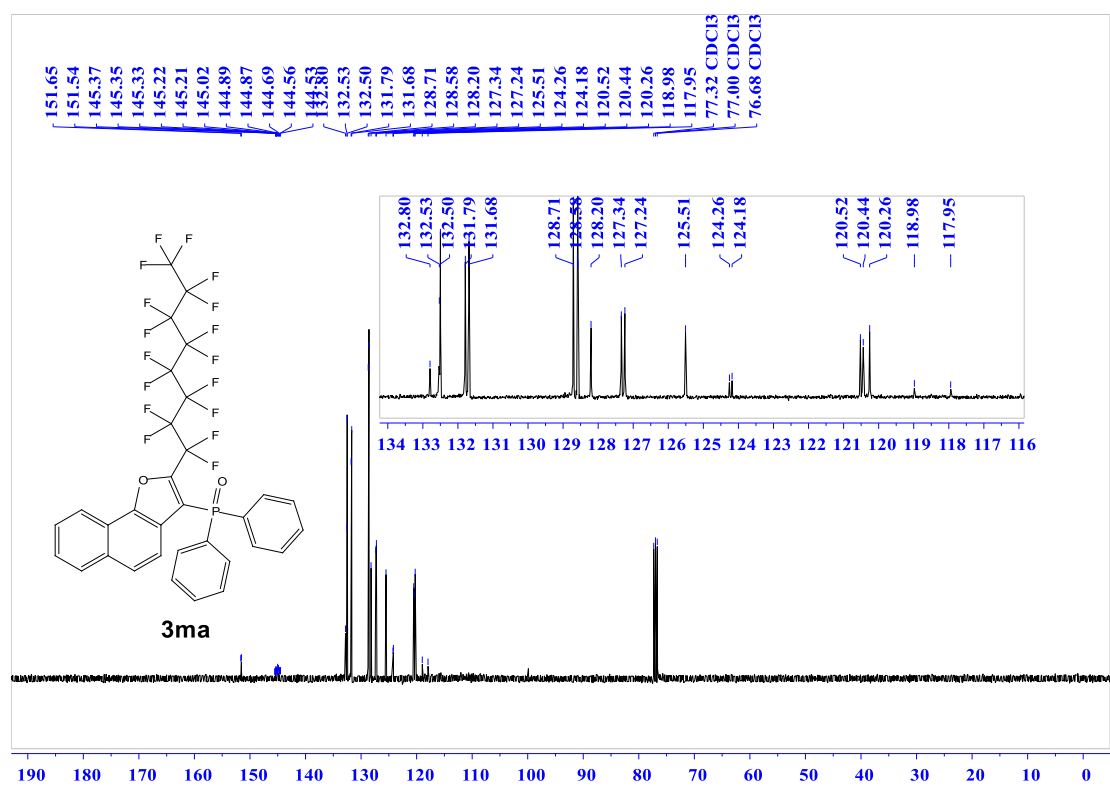

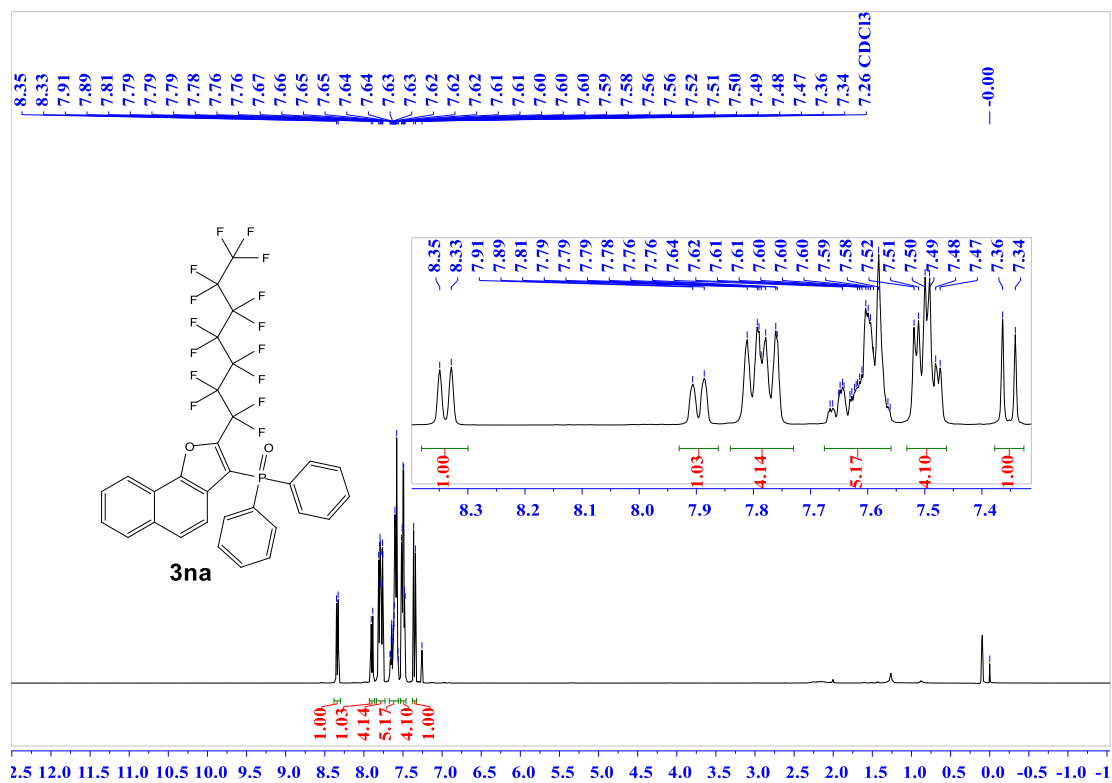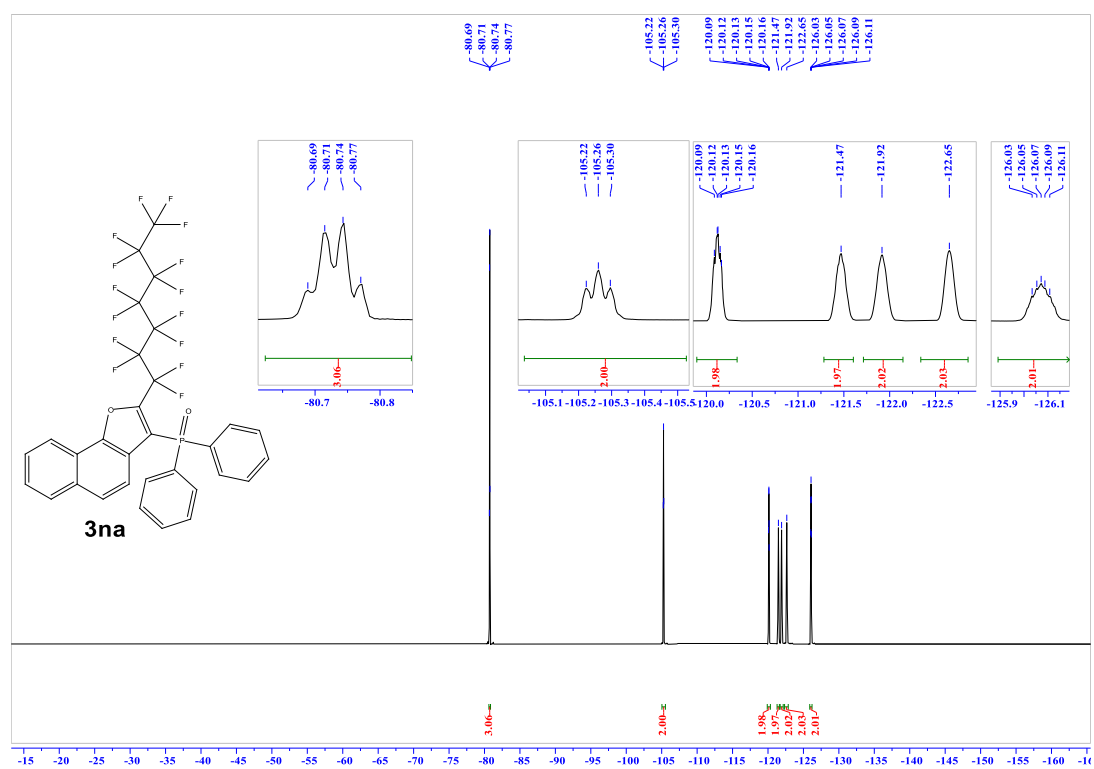



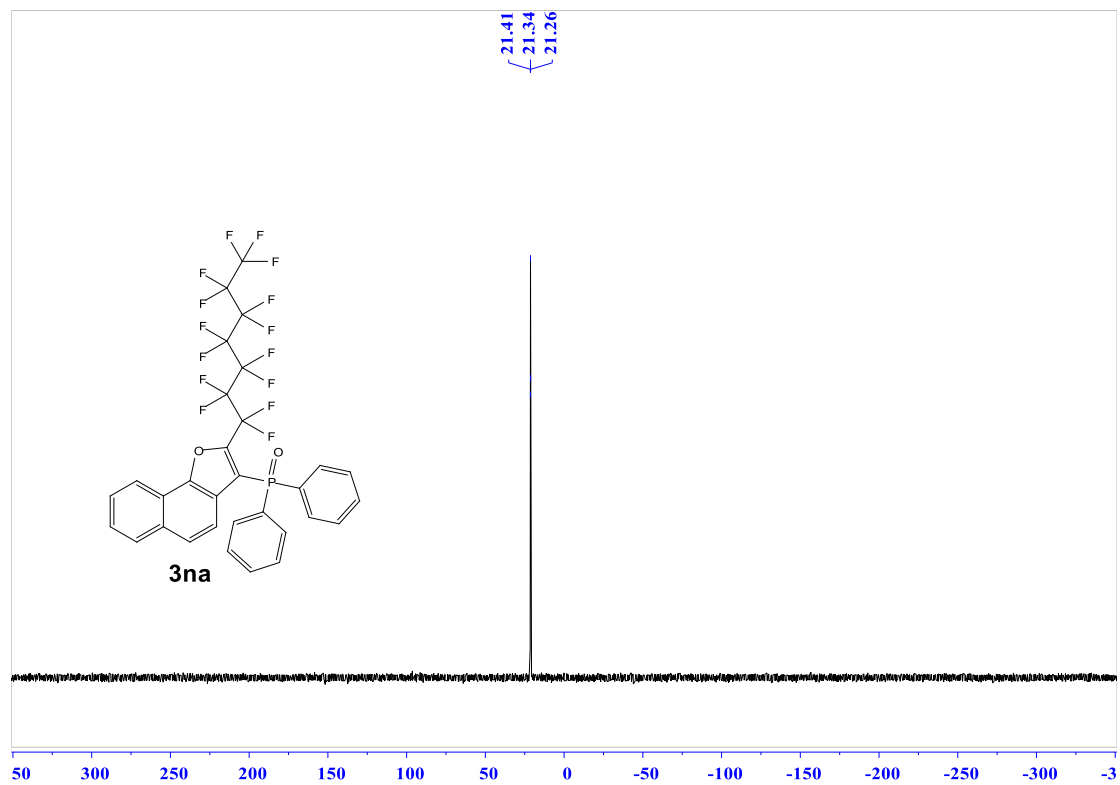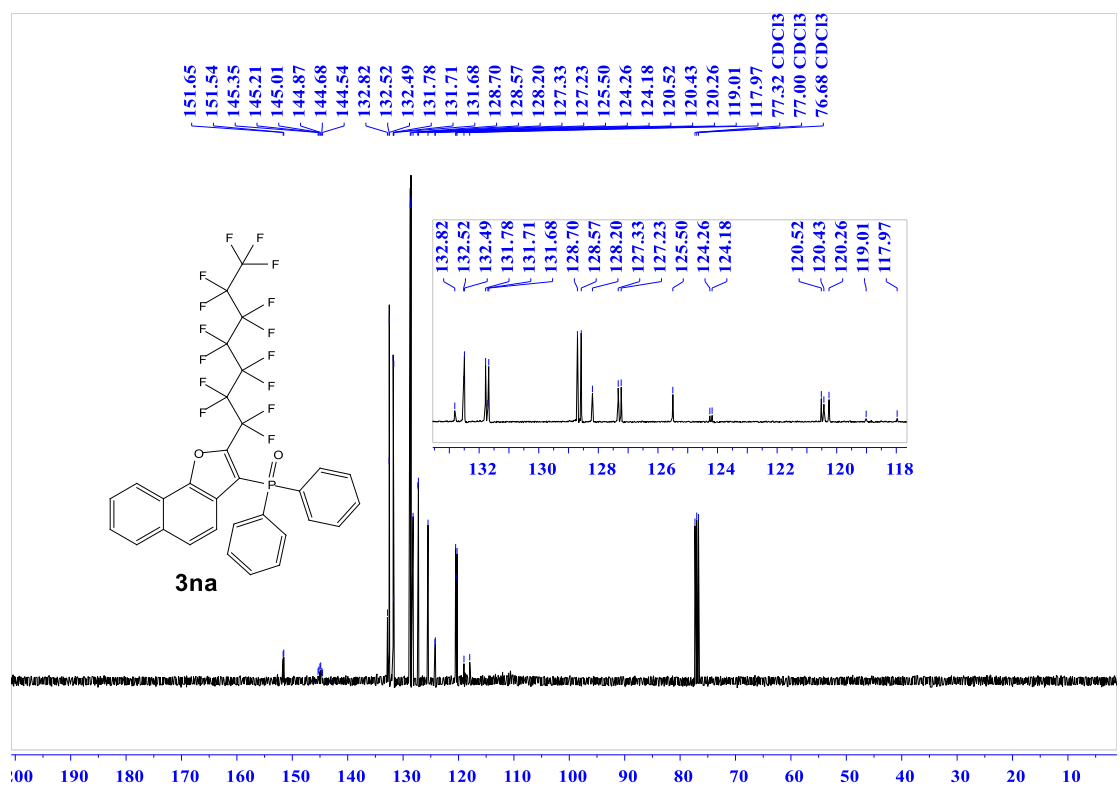

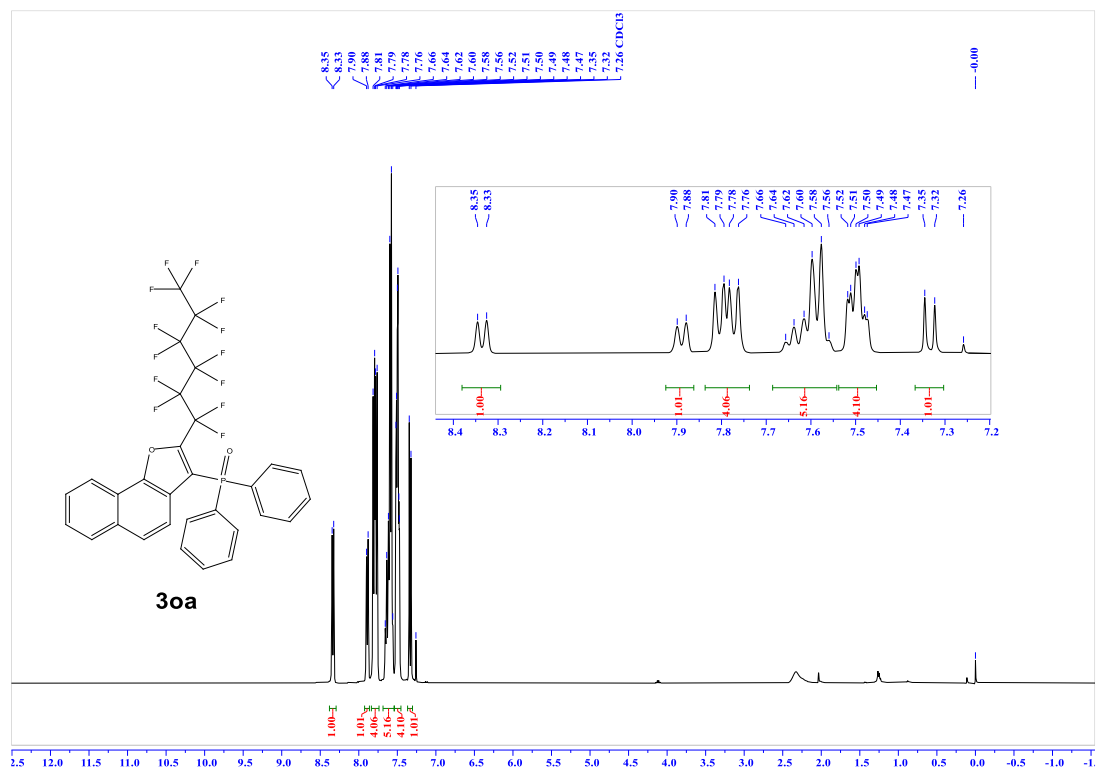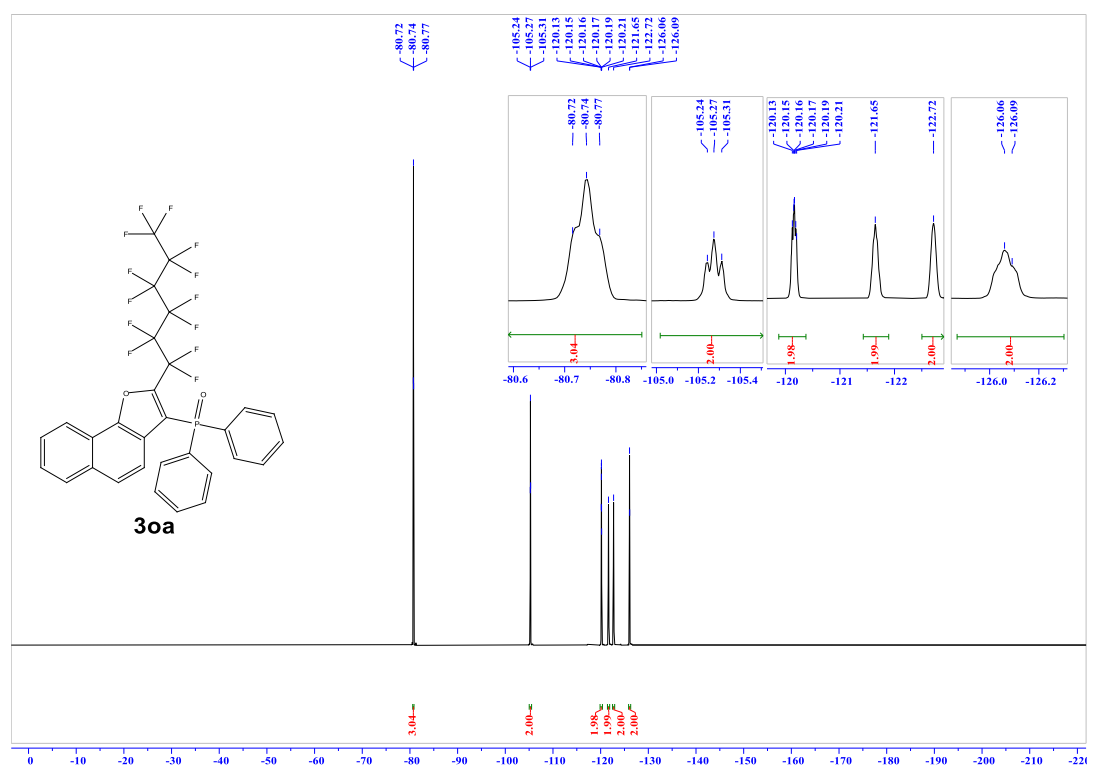

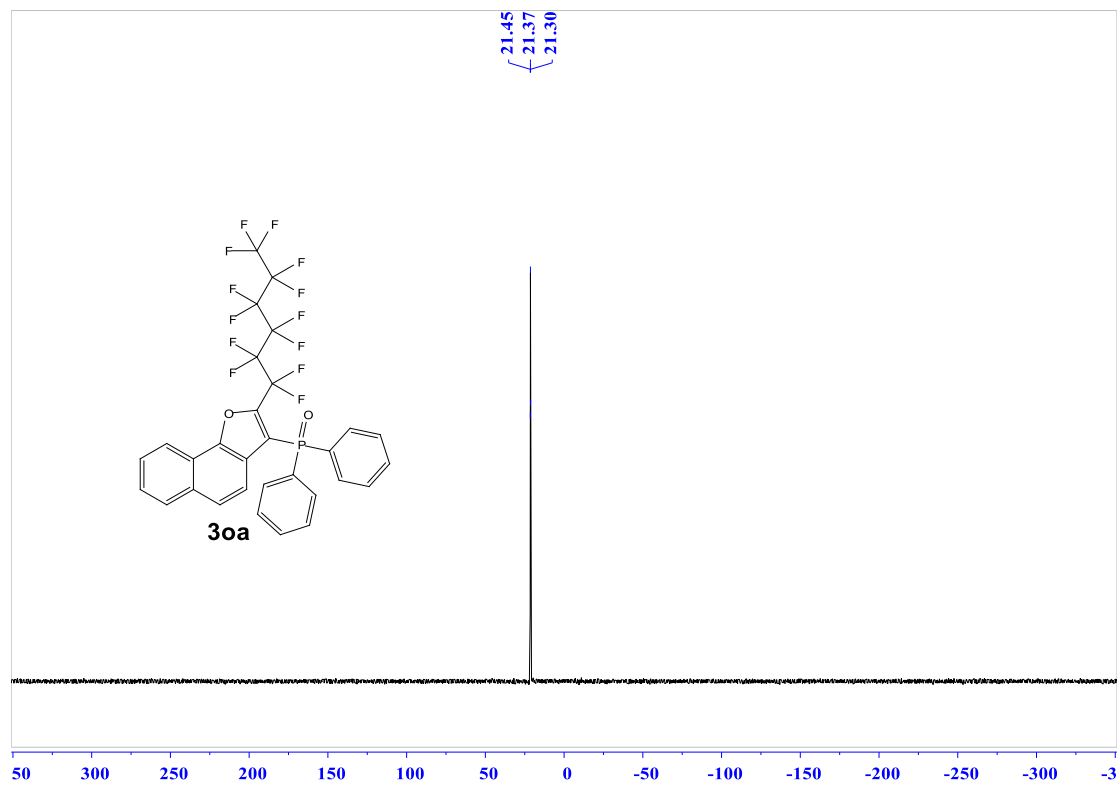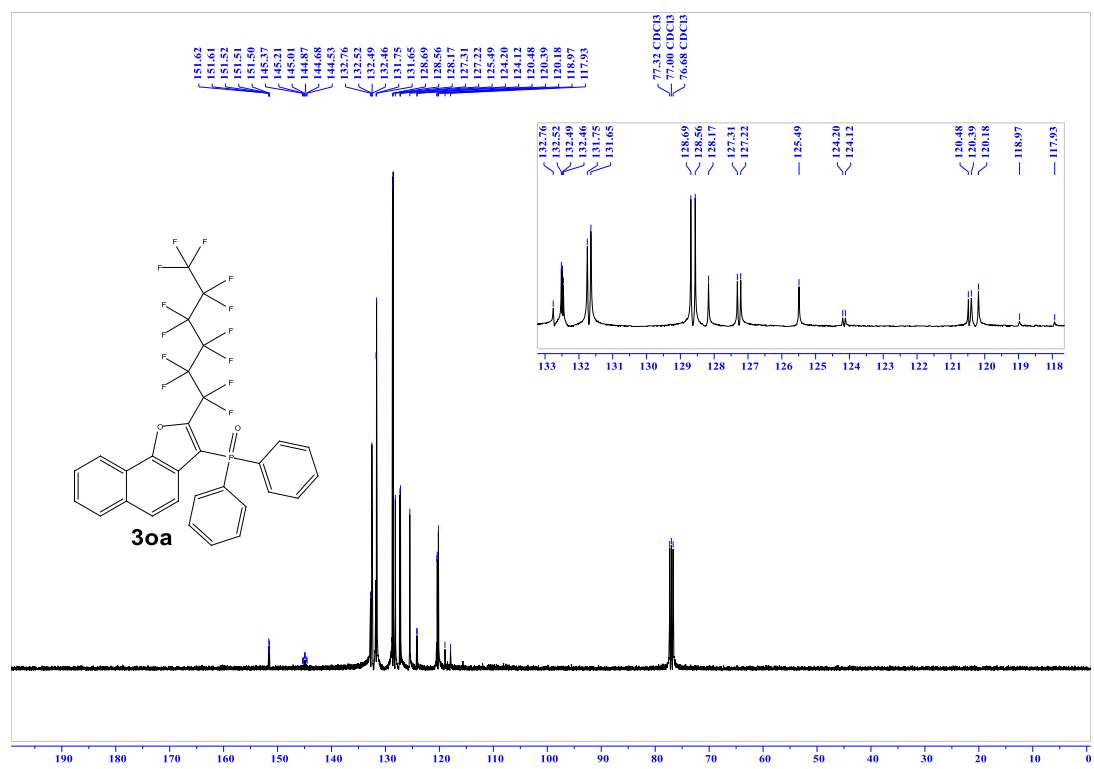

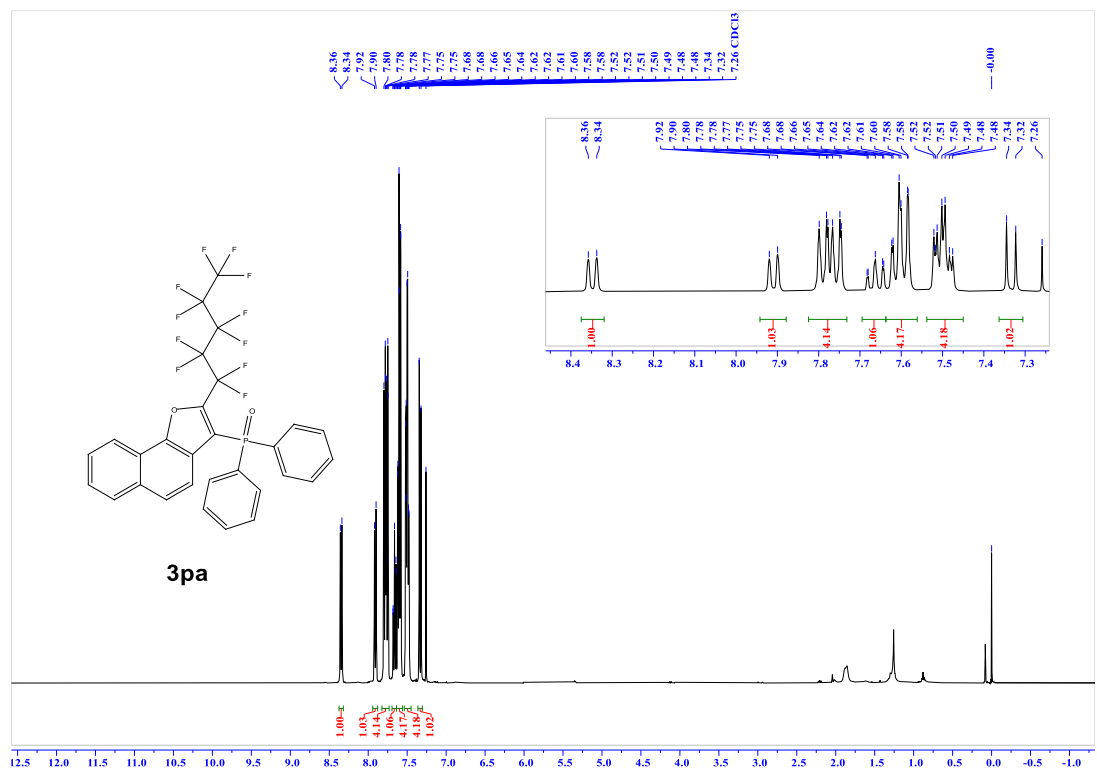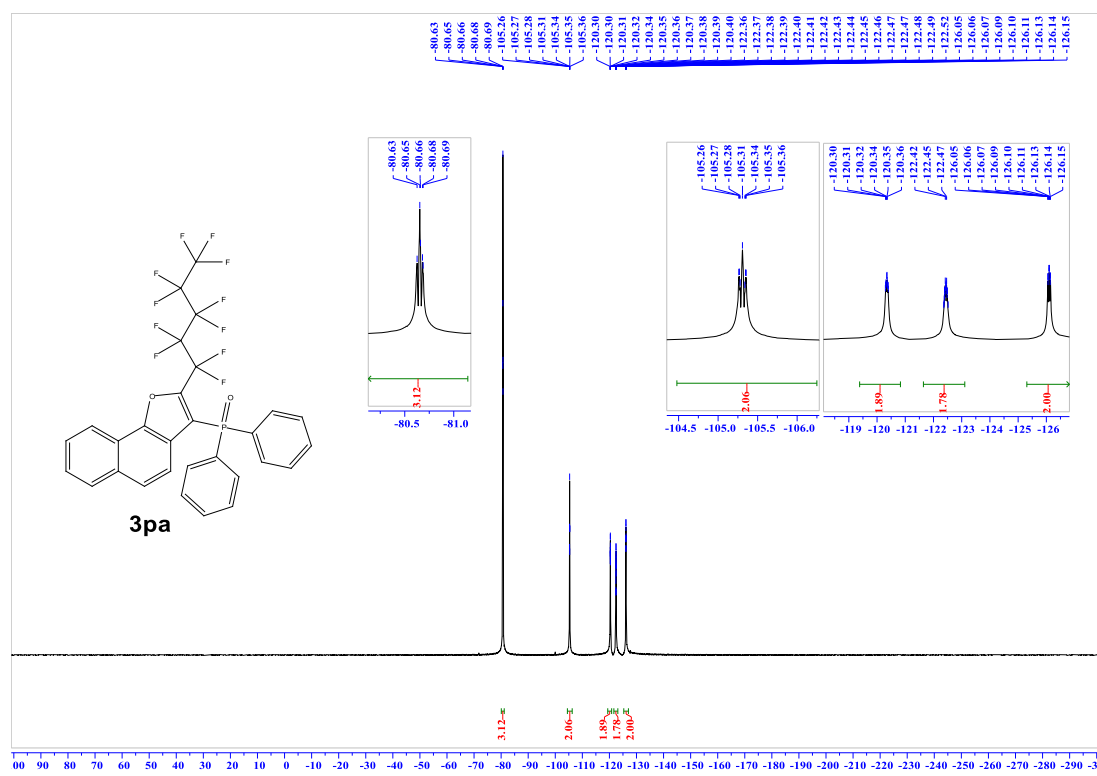

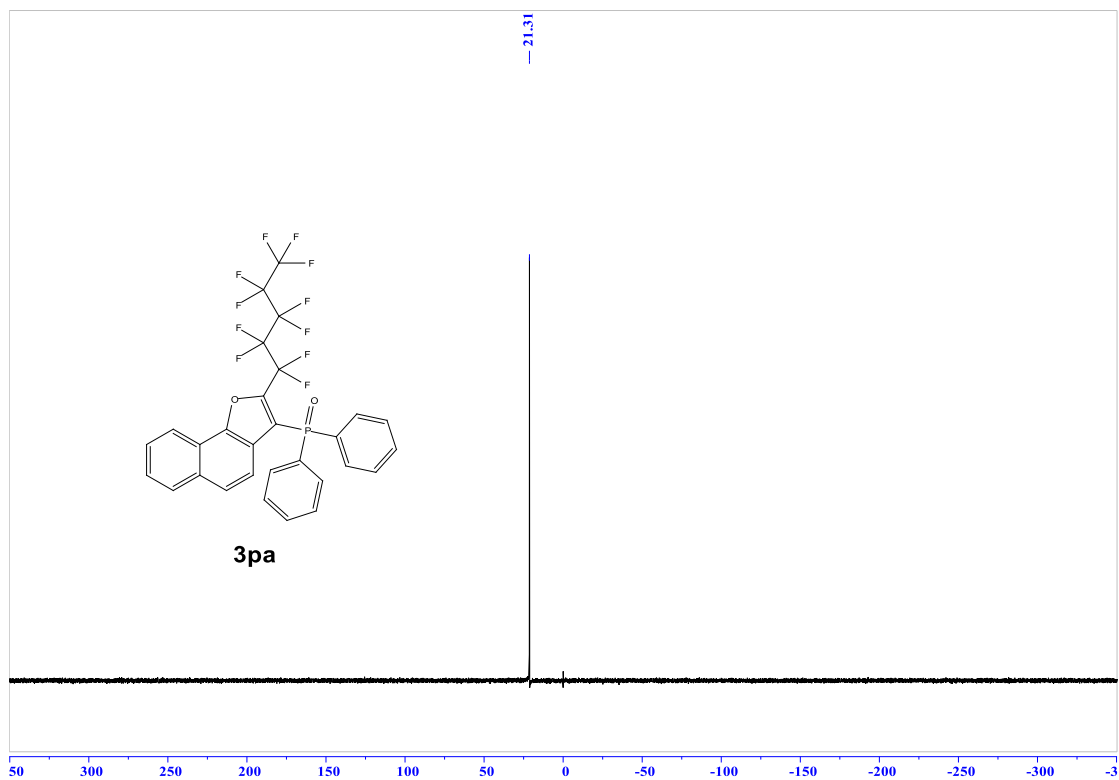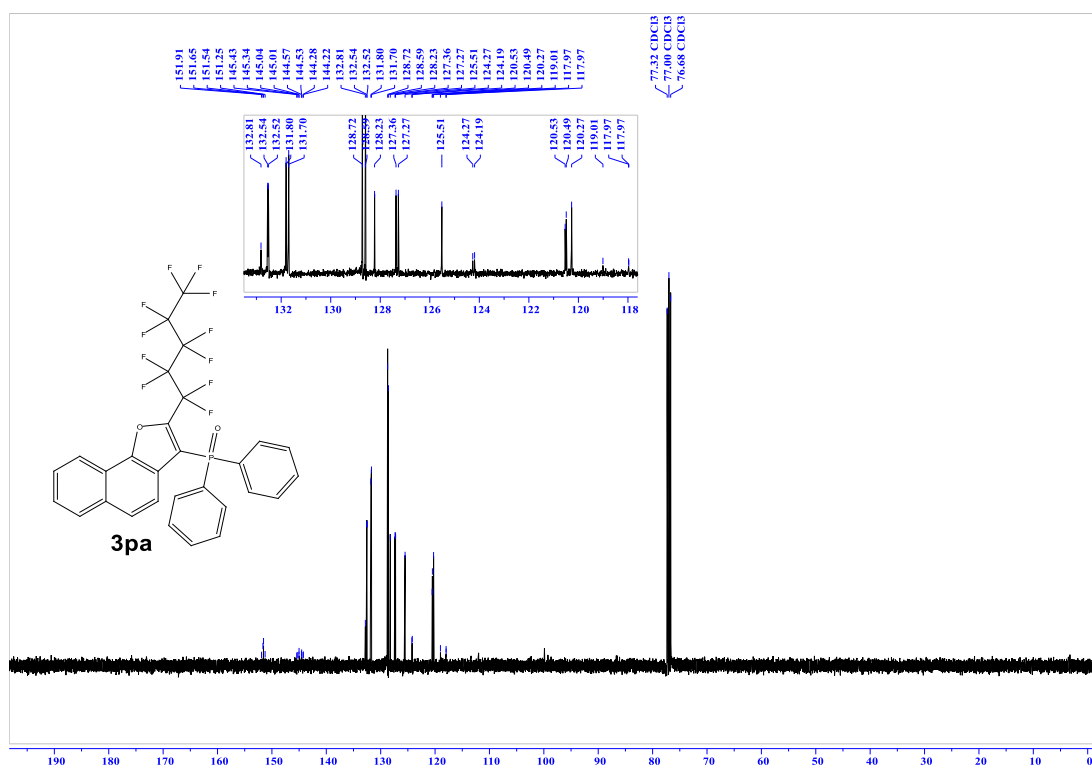

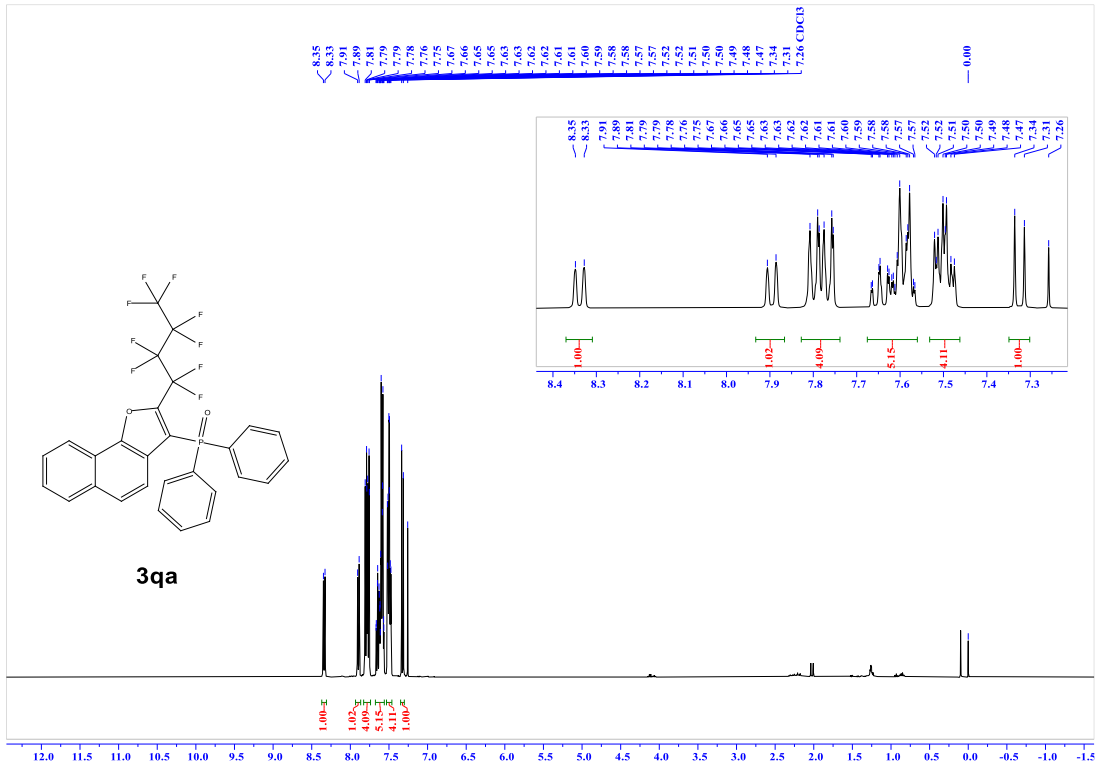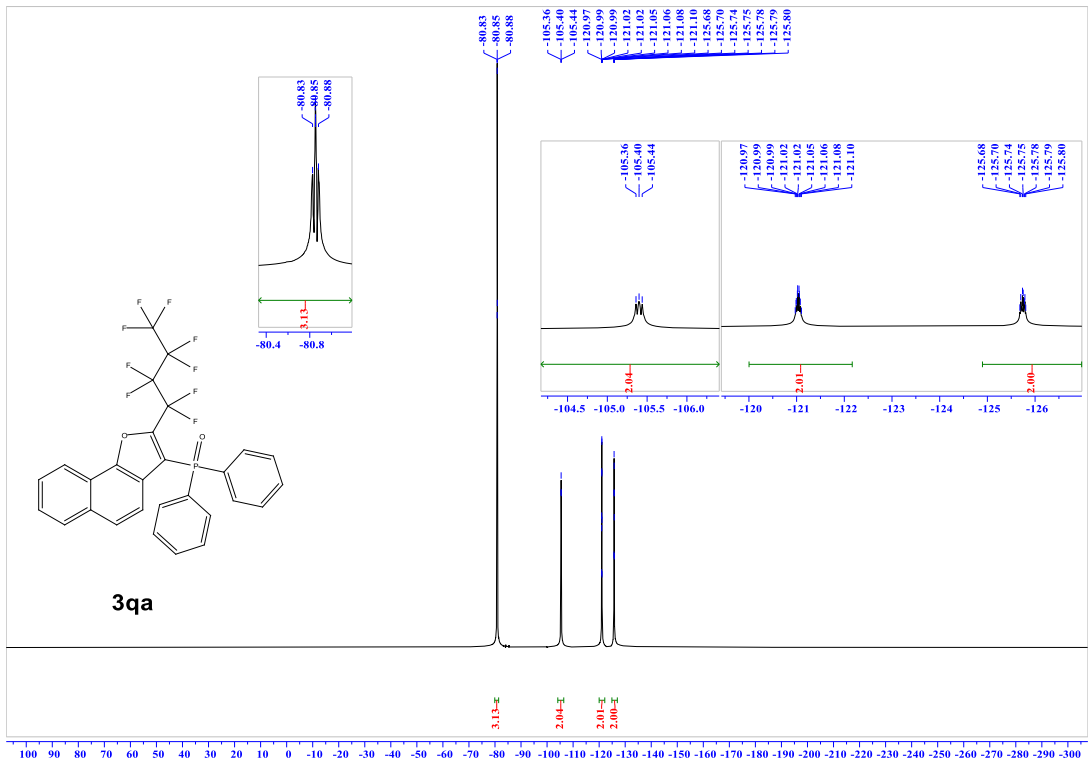

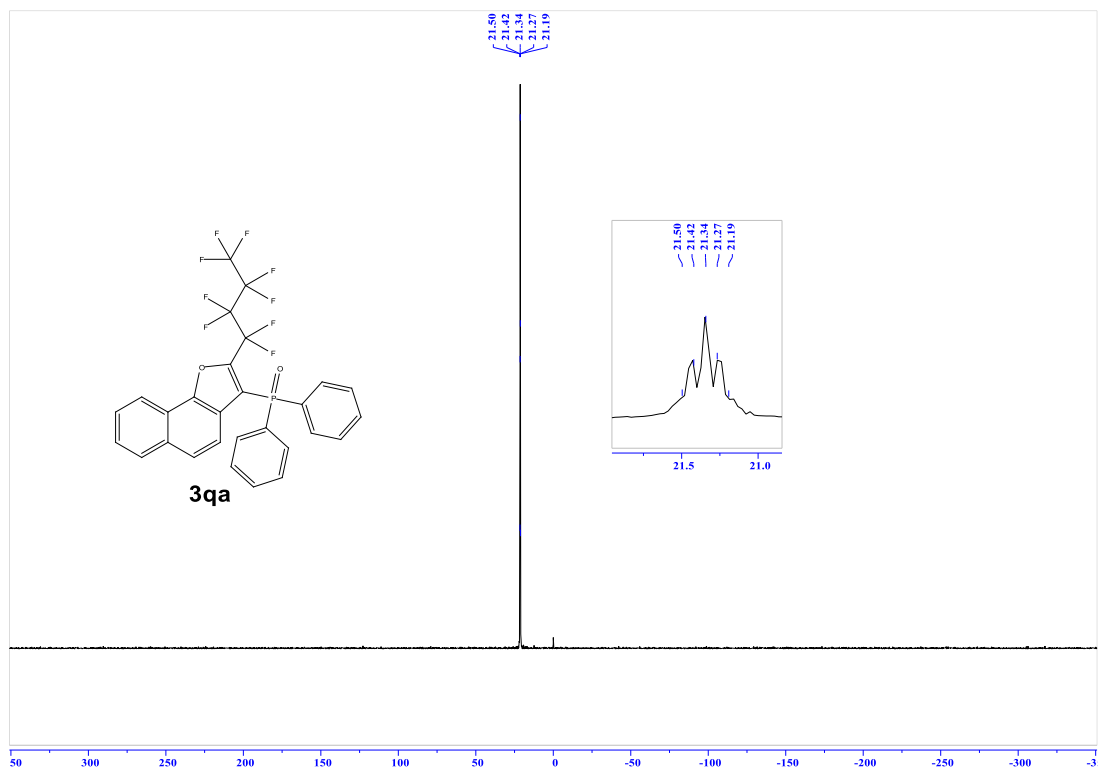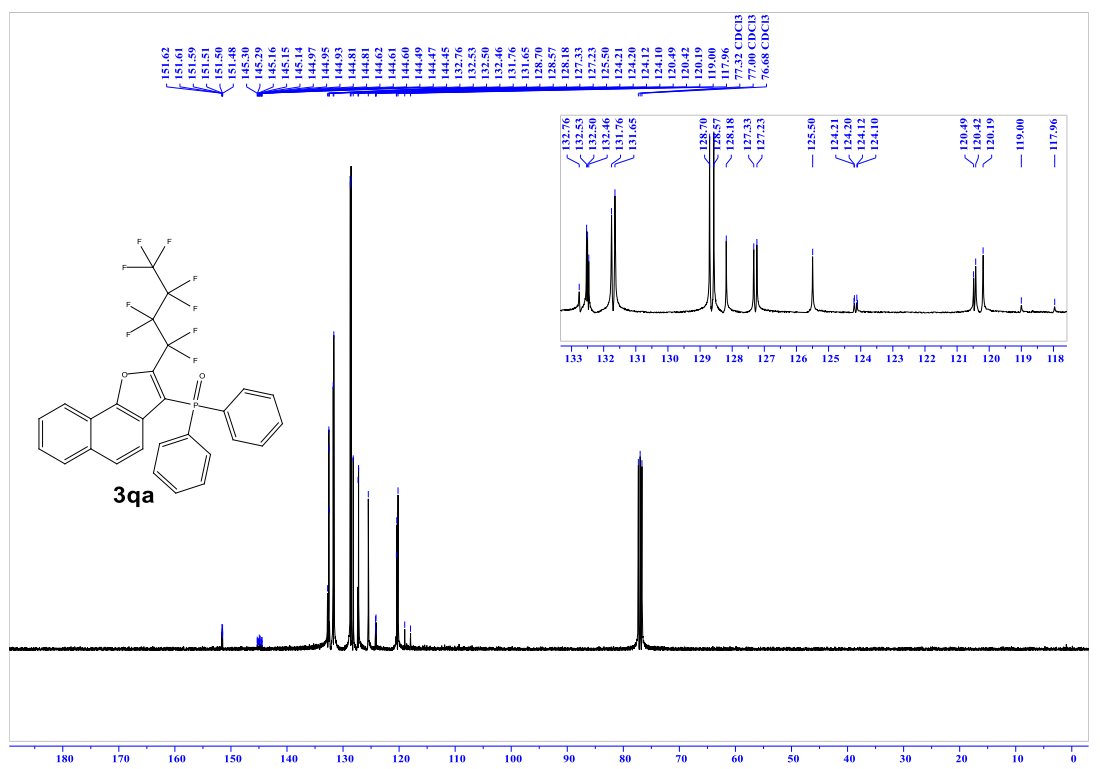

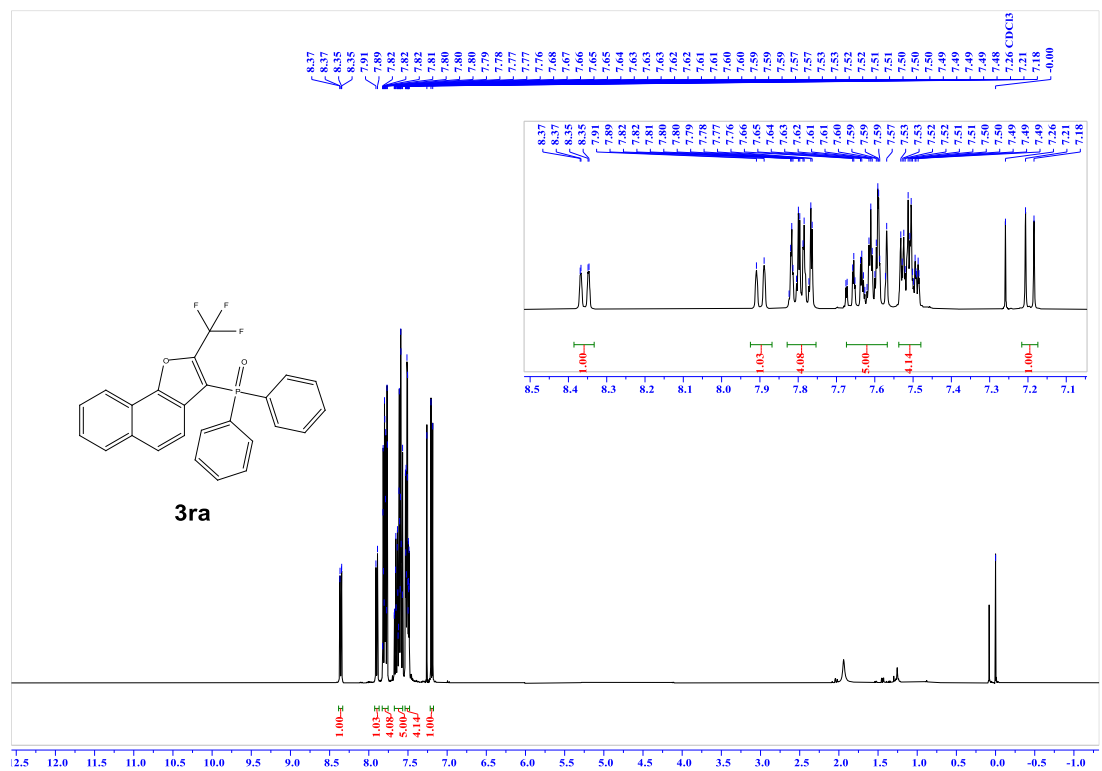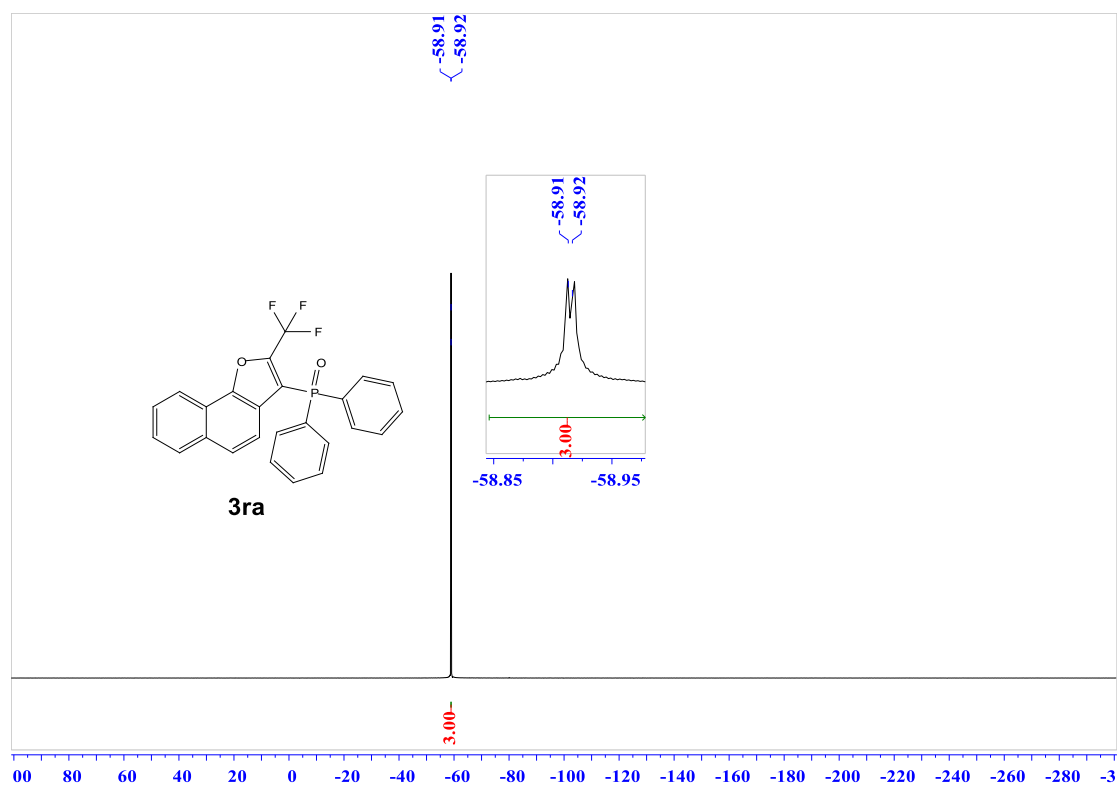



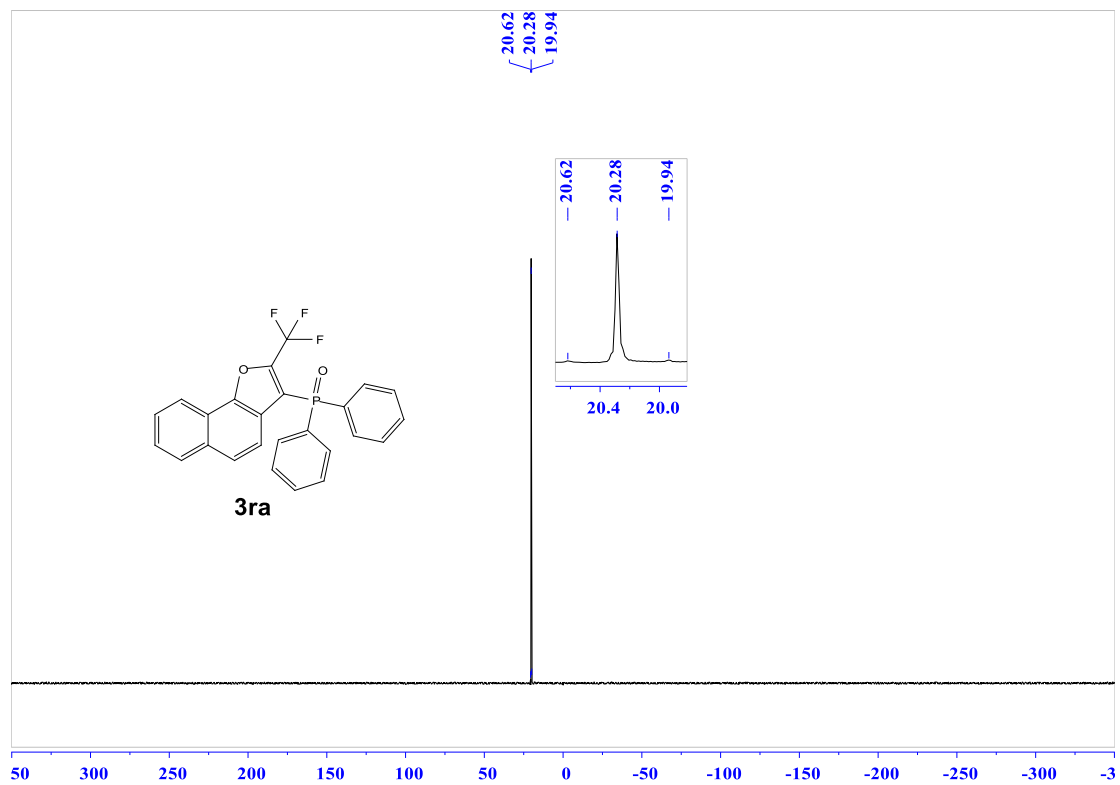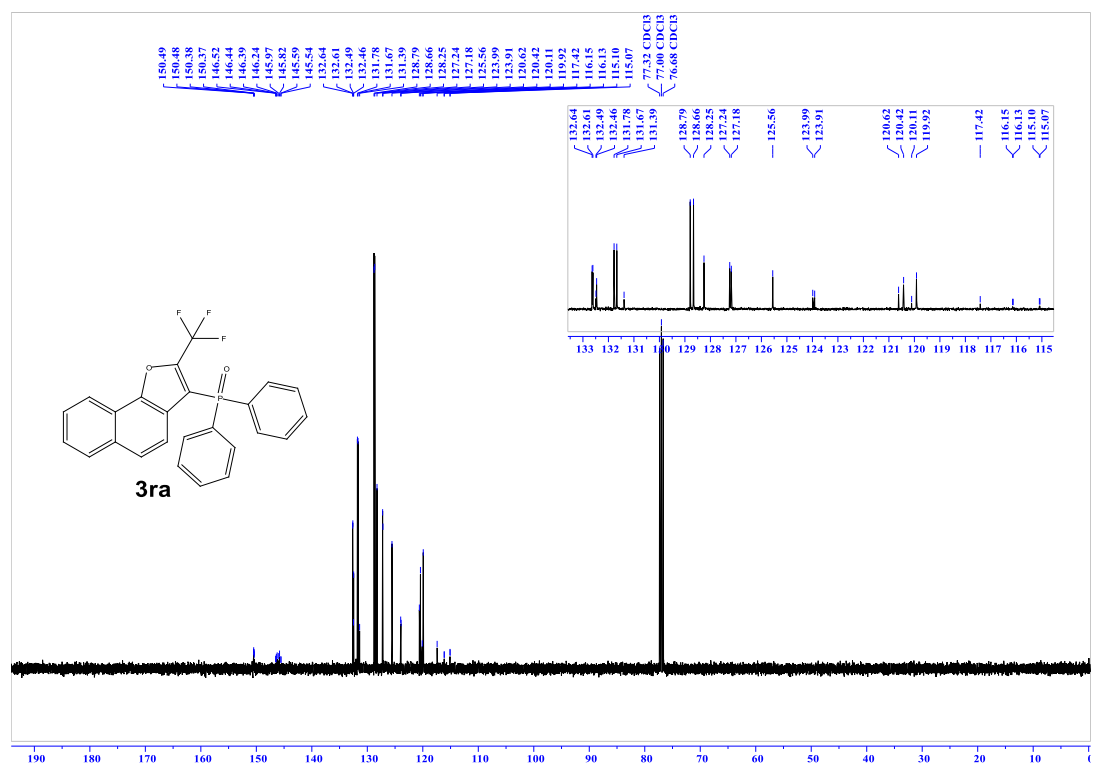

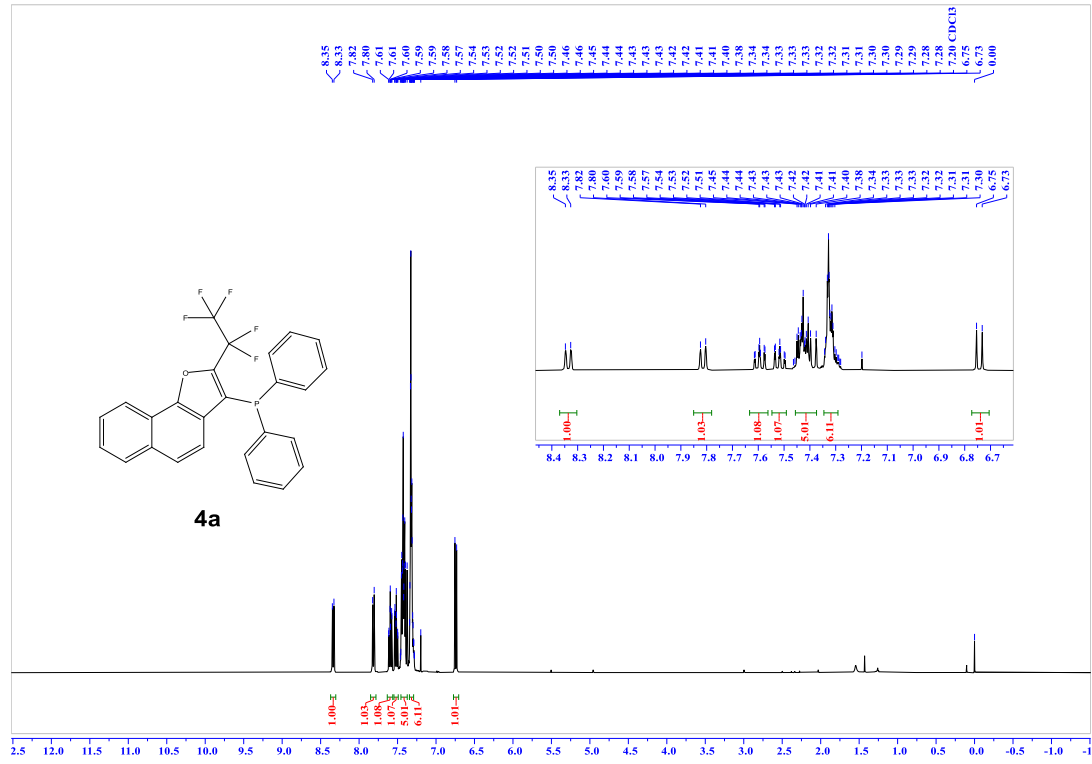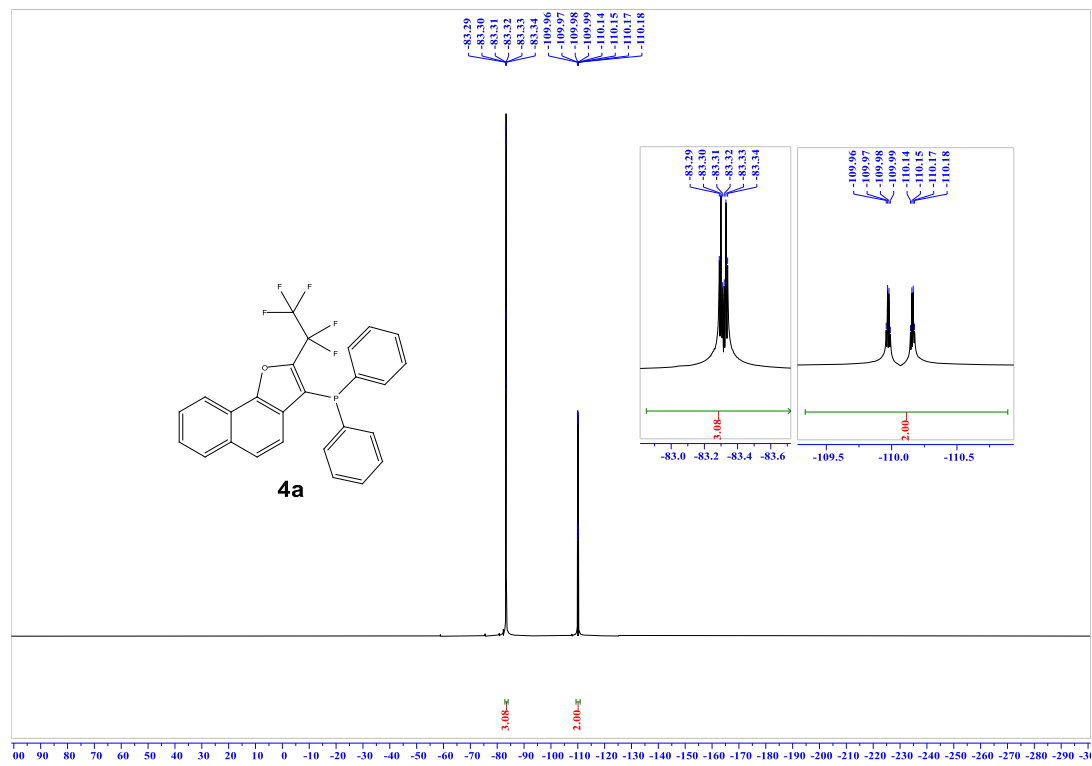

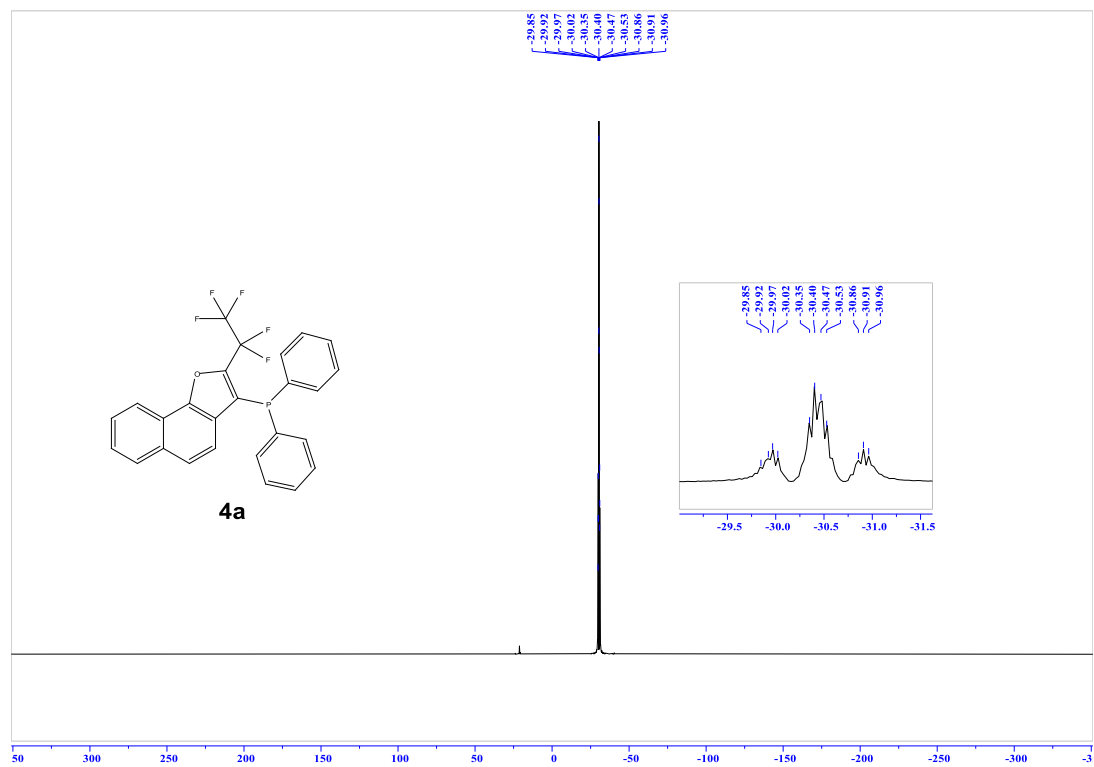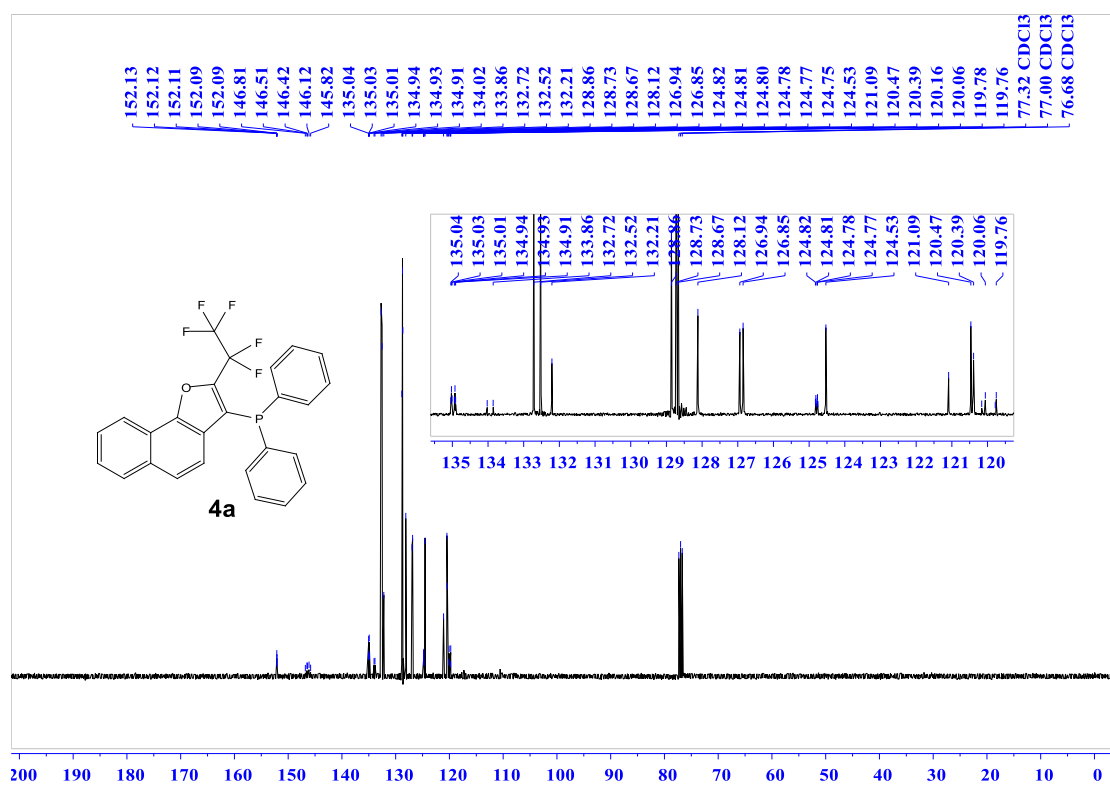

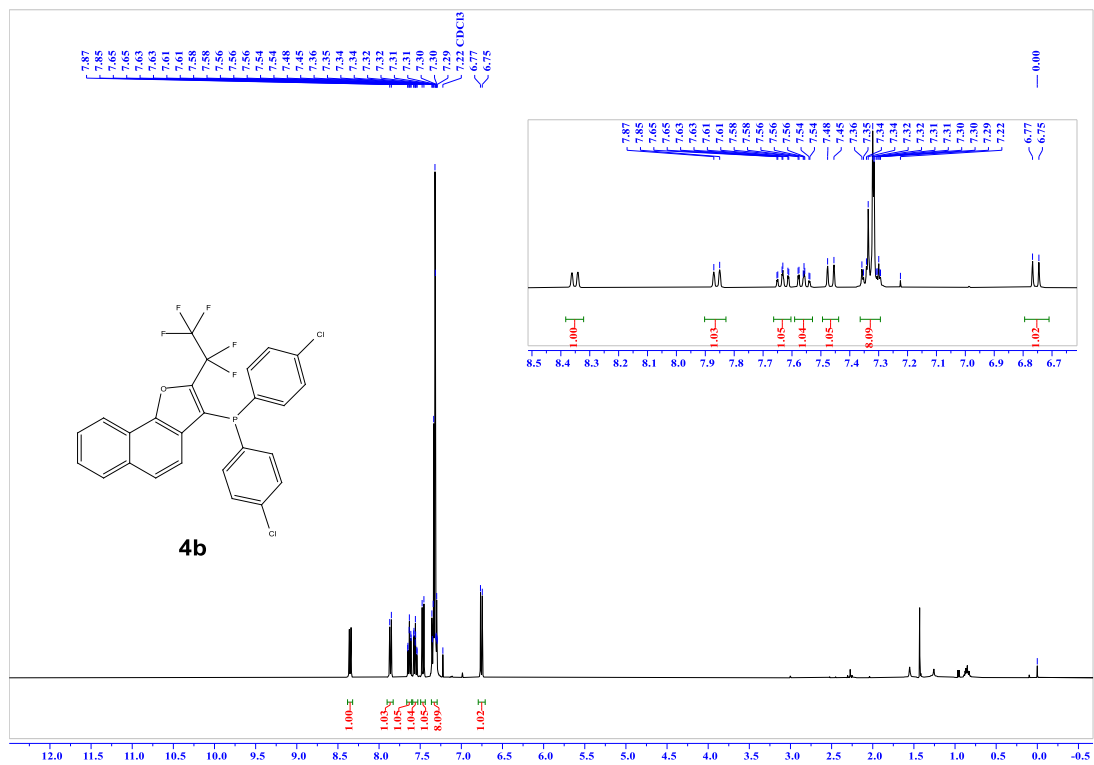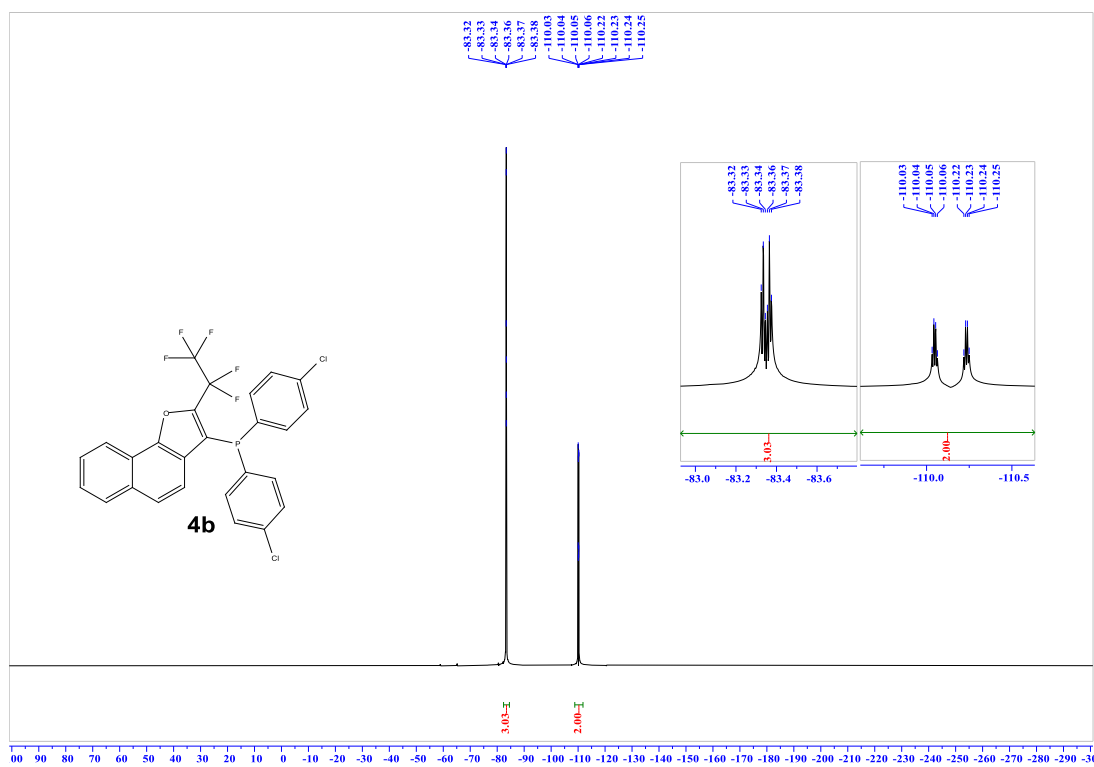

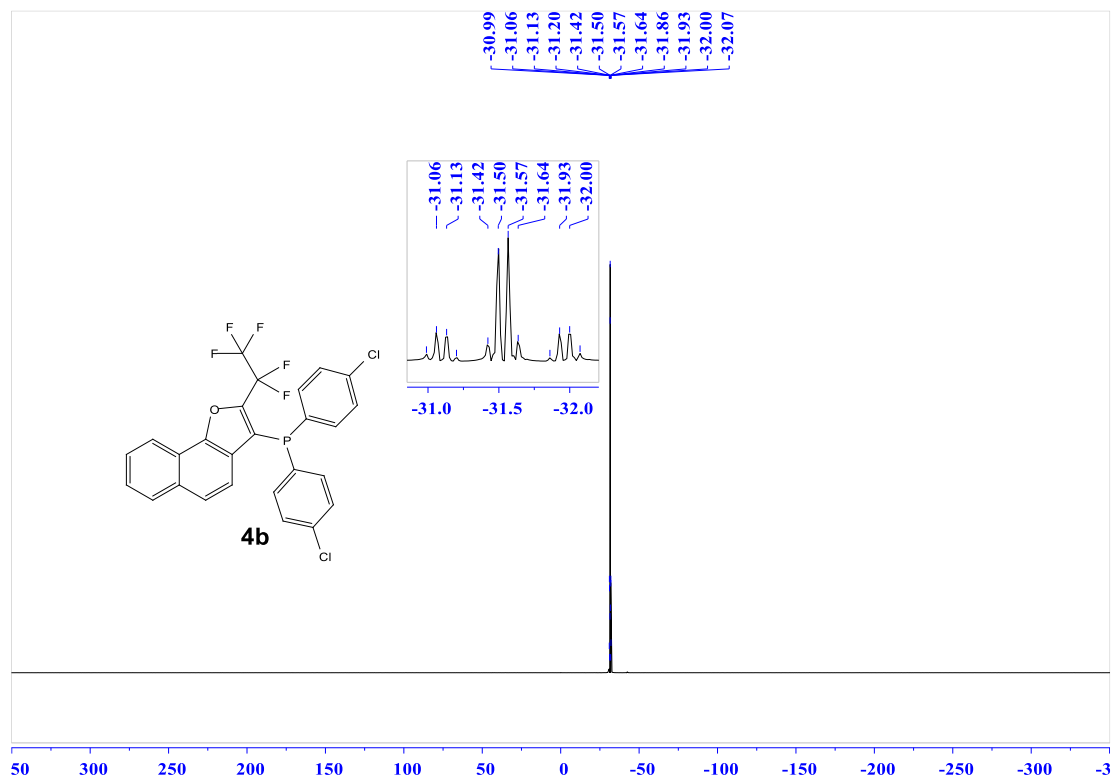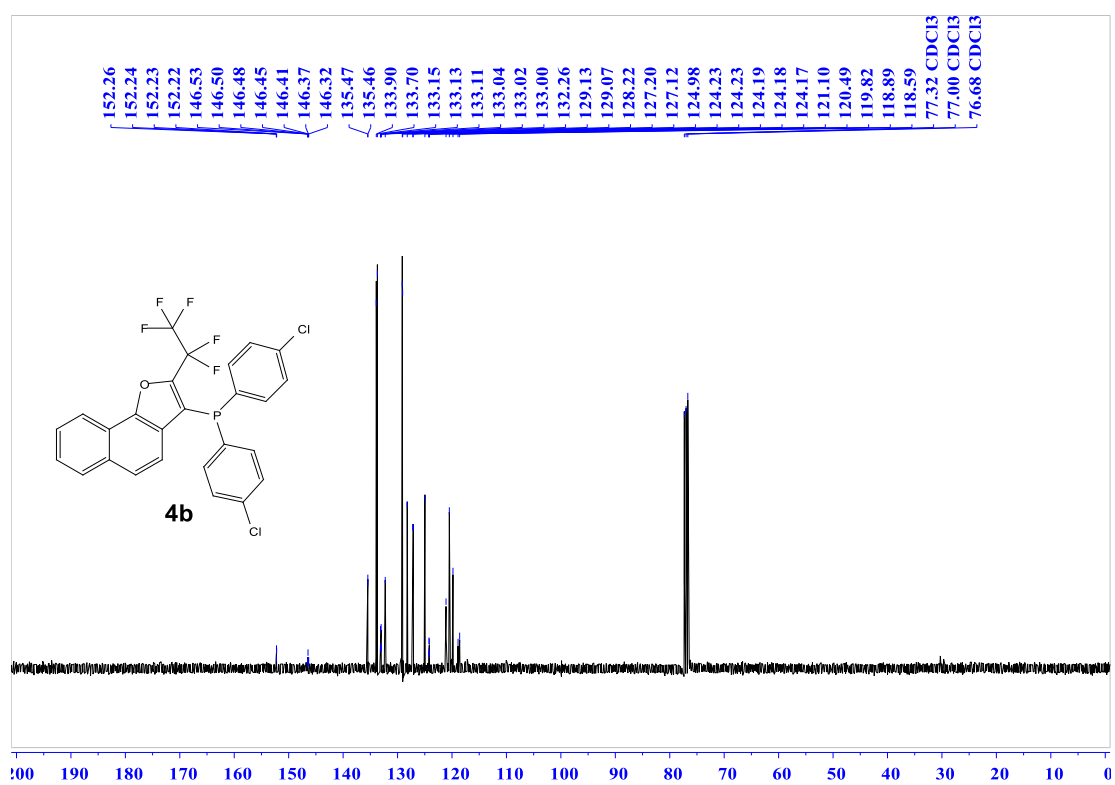

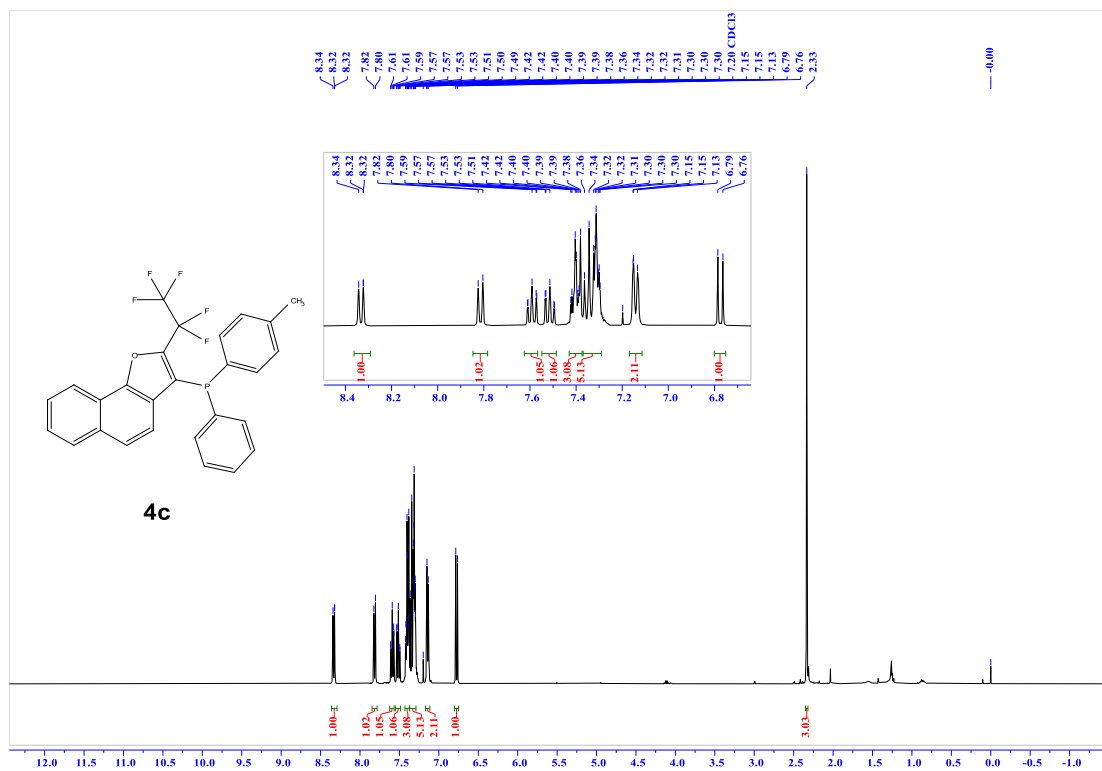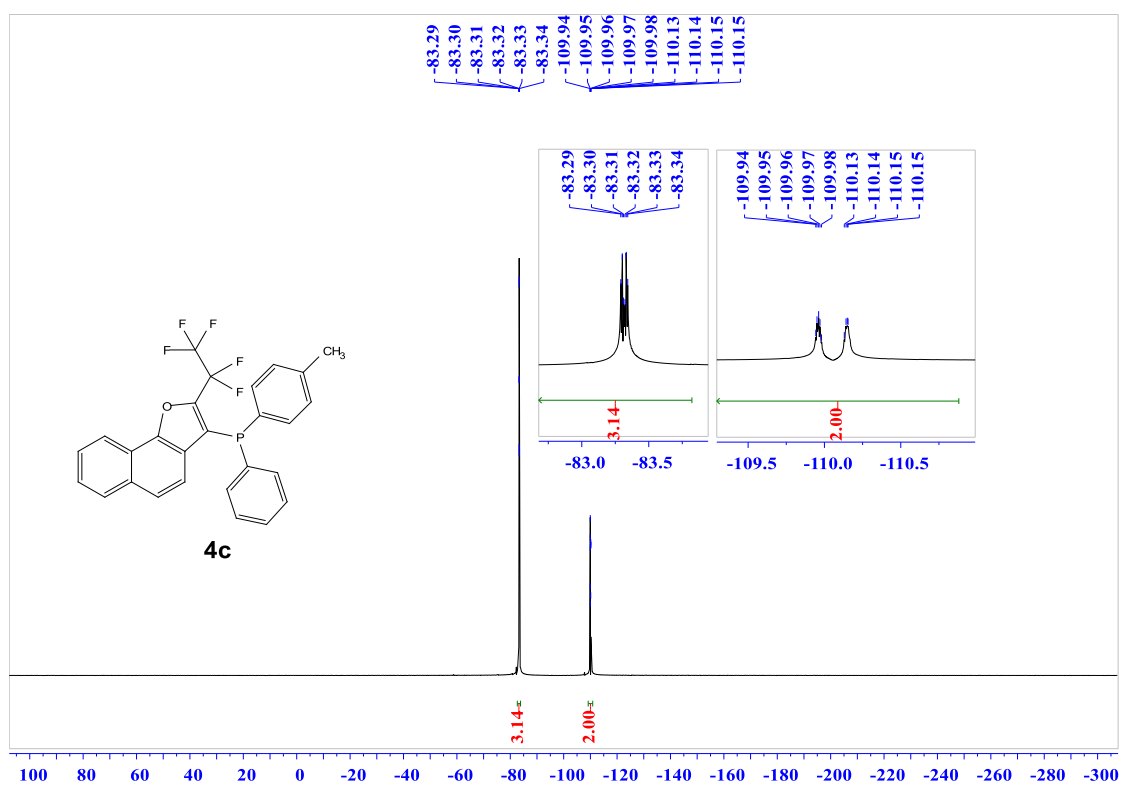

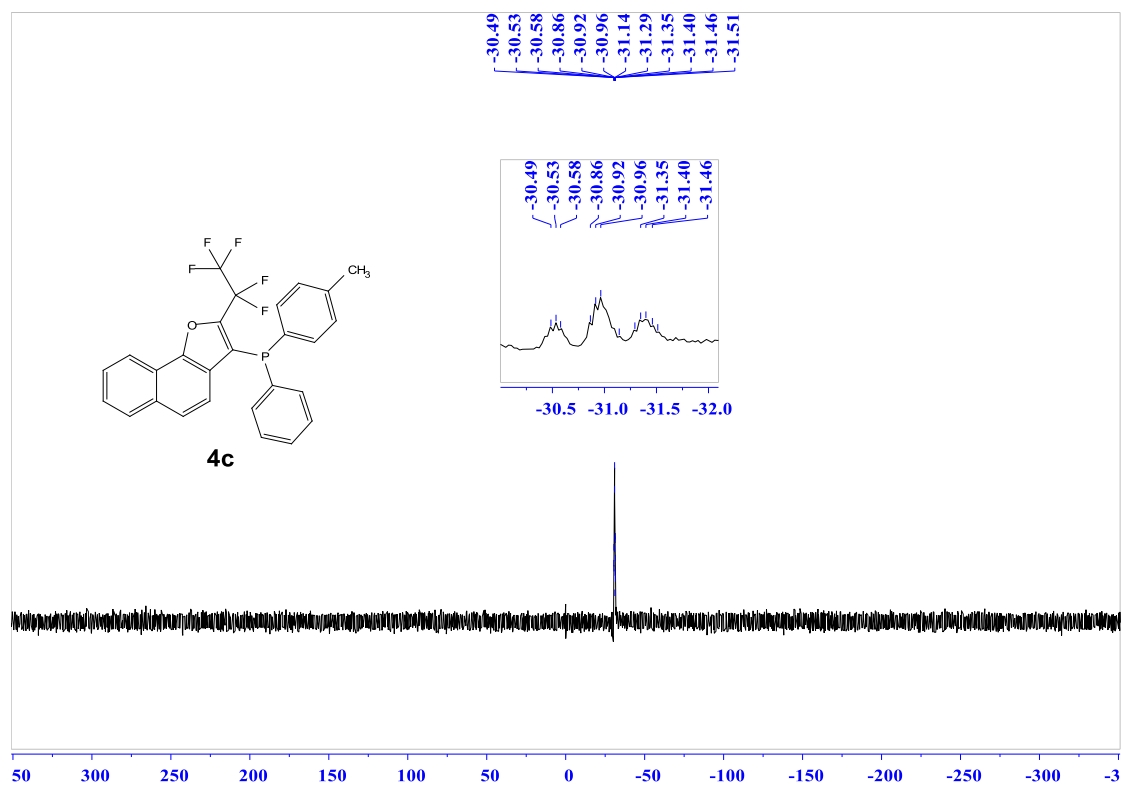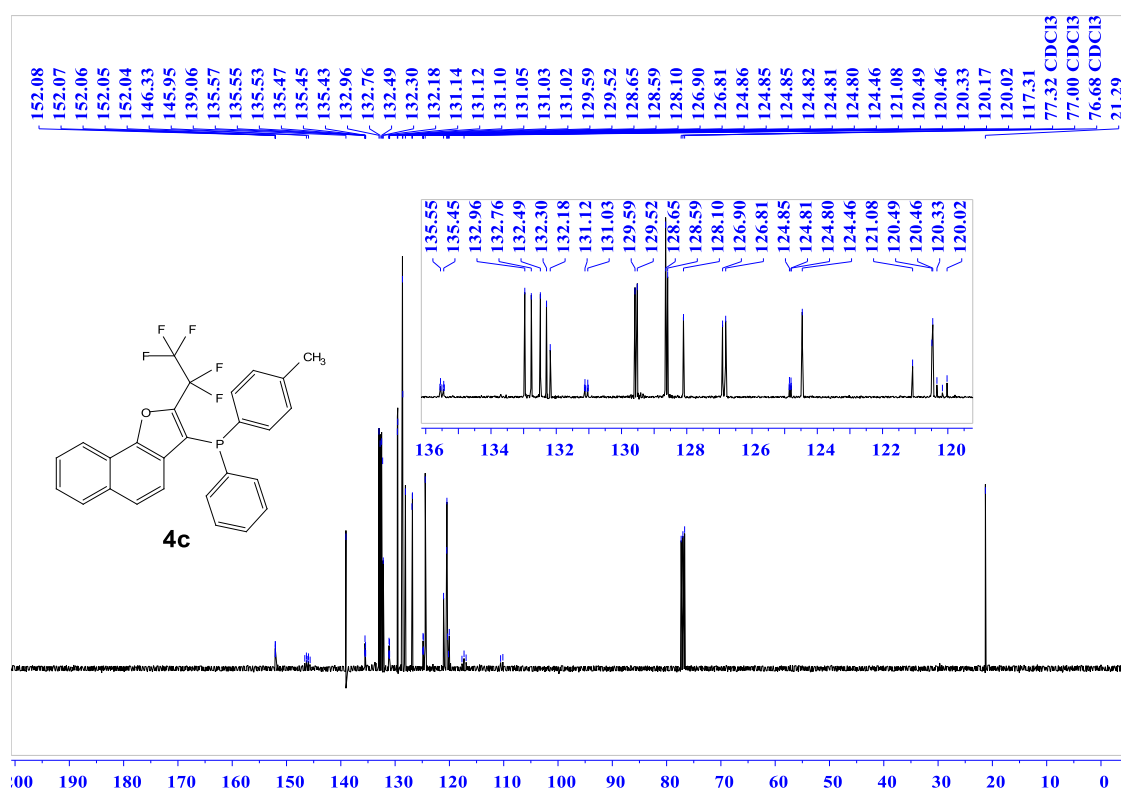

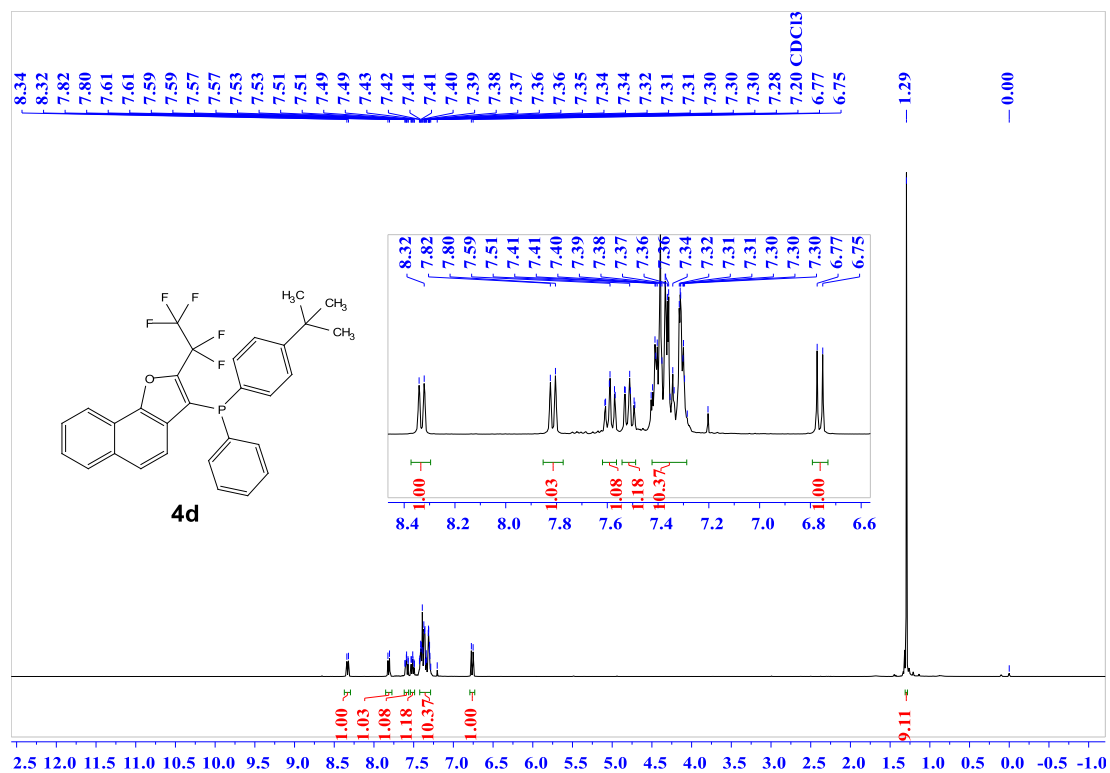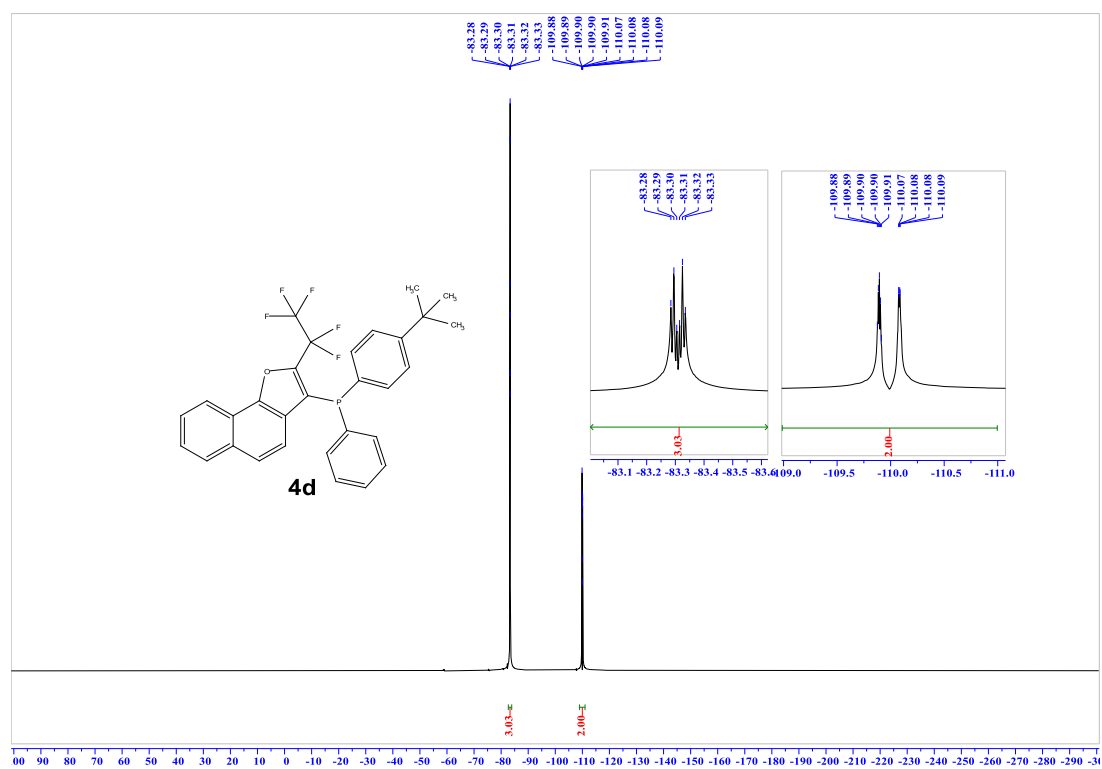



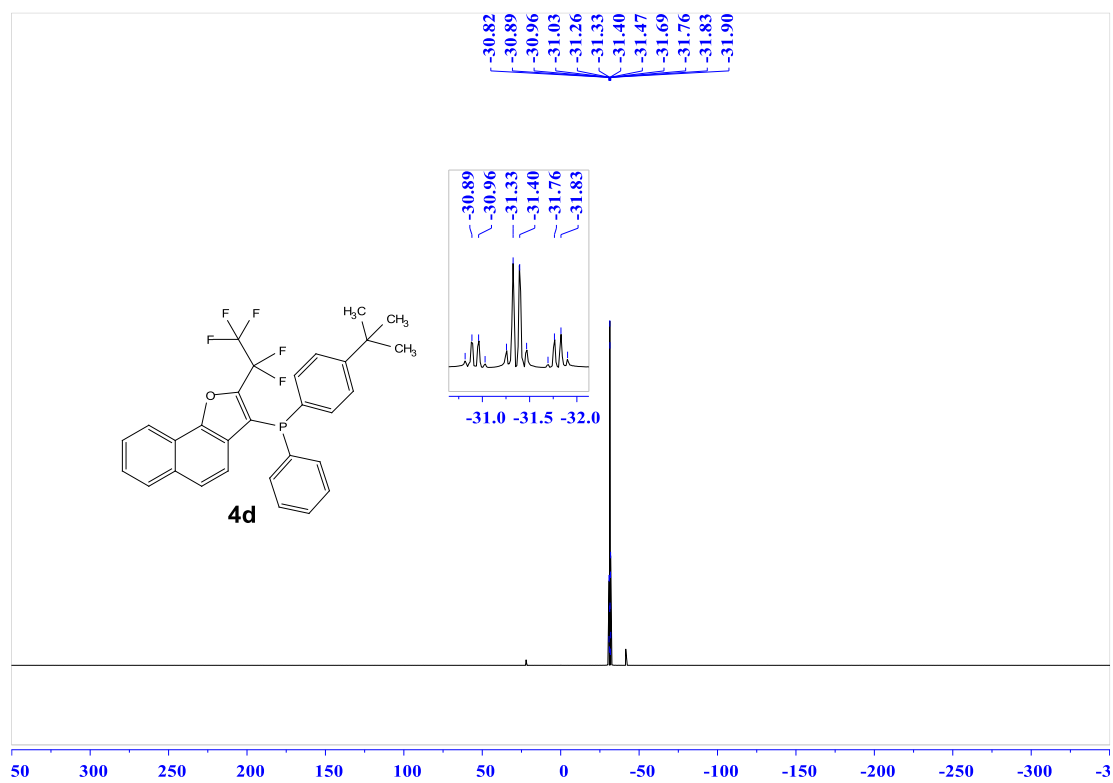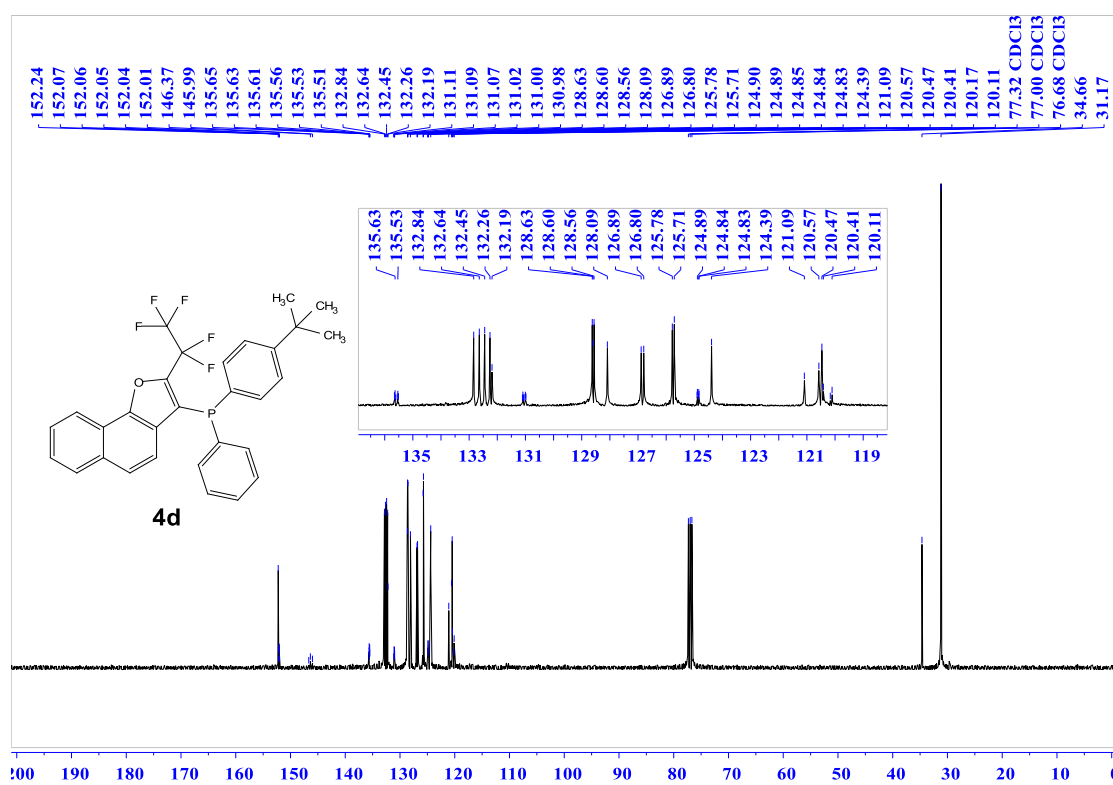

Supplement: d0qo01631d1.pdf [file d0qo01631d1.pdf]
